# Supplementary material for: Dietary determinants of serum total cholesterol among middle-aged and older adults: a population-based cross-sectional study in Dar es Salaam, Tanzania
Source: PubMed Central journal article supplement — BMJ Open. 2017 Jun 6;7(5):e015028. doi: 10.1136/bmjopen-2016-015028 (PMC5663012; doi:10.1136/bmjopen-2016-015028), 2017-06-06
Supplement: bmjopen-2016-015028.draft_revisions.pdf [file bmjopen-2016-015028.draft_revisions.pdf]

# BMJ Open

## Dietary determinants of serum total cholesterol among middle-aged and older adults in Dar es Salaam, Tanzania: a population-based cross-sectional study

|                                 |                                                                                                                                                                                                                                                                                                                                                                                                                                                                                                                                                                                                                                                                                                                                                                                                                                                                                                                                                                                                          |
|---------------------------------|----------------------------------------------------------------------------------------------------------------------------------------------------------------------------------------------------------------------------------------------------------------------------------------------------------------------------------------------------------------------------------------------------------------------------------------------------------------------------------------------------------------------------------------------------------------------------------------------------------------------------------------------------------------------------------------------------------------------------------------------------------------------------------------------------------------------------------------------------------------------------------------------------------------------------------------------------------------------------------------------------------|
| Journal:                        | <i>BMJ Open</i>                                                                                                                                                                                                                                                                                                                                                                                                                                                                                                                                                                                                                                                                                                                                                                                                                                                                                                                                                                                          |
| Manuscript ID                   | bmjopen-2016-015028                                                                                                                                                                                                                                                                                                                                                                                                                                                                                                                                                                                                                                                                                                                                                                                                                                                                                                                                                                                      |
| Article Type:                   | Research                                                                                                                                                                                                                                                                                                                                                                                                                                                                                                                                                                                                                                                                                                                                                                                                                                                                                                                                                                                                 |
| Date Submitted by the Author:   | 03-Nov-2016                                                                                                                                                                                                                                                                                                                                                                                                                                                                                                                                                                                                                                                                                                                                                                                                                                                                                                                                                                                              |
| Complete List of Authors:       | Kakarmath, Sujay; Harvard T.H. Chan School of Public Health, Global Health and Population<br>Zack, Rachel; Harvard T.H. Chan School of Public Health, Epidemiology<br>Leyna, Germana; Muhimbili University of Health and Allied Sciences, Epidemiology & Biostatistics, School of Public Health<br>Fahimi, Saman; Harvard T.H. Chan School of Public Health, Global Health and Population<br>Liu, Enju; Harvard T.H. Chan School of Public Health, Global Health and Population<br>Fawzi, Wafaie; Harvard T.H. Chan School of Public Health, Global Health and Population, Epidemiology, Nutrition<br>Lukmanji, Zohra; World Food Program; Tumaini Hospital<br>Killewo, Japhet; Muhimbili University of Health and Allied Sciences, Epidemiology & Biostatistics, School of Public Health<br>Sacks, Frank; Harvard T.H. Chan School of Public Health, Nutrition, Genetics and Complex Diseases<br>Danaei, Goodarz; Harvard T.H. Chan School of Public Health, Global Health and Population, Epidemiology |
| <b>Primary Subject Heading</b>: | Nutrition and metabolism                                                                                                                                                                                                                                                                                                                                                                                                                                                                                                                                                                                                                                                                                                                                                                                                                                                                                                                                                                                 |
| Secondary Subject Heading:      | Epidemiology, Public health, Global health, Cardiovascular medicine                                                                                                                                                                                                                                                                                                                                                                                                                                                                                                                                                                                                                                                                                                                                                                                                                                                                                                                                      |
| Keywords:                       | cholesterol, palm oil, diet, Nutrition < TROPICAL MEDICINE, Tanzania, sub-Saharan Africa                                                                                                                                                                                                                                                                                                                                                                                                                                                                                                                                                                                                                                                                                                                                                                                                                                                                                                                 |
|                                 |                                                                                                                                                                                                                                                                                                                                                                                                                                                                                                                                                                                                                                                                                                                                                                                                                                                                                                                                                                                                          |

SCHOLARONE™  
Manuscripts

1  
2  
3  
4 **Dietary determinants of serum total cholesterol among middle-aged and older**  
5 **adults in Dar es Salaam, Tanzania: a population-based cross-sectional study**  
6  
7  
8

9 **Authors:** Sujay Kakarmath MBBS Master's student<sup>a</sup>, Rachel M Zack MSc Doctoral  
10 student<sup>b</sup>, Germana H Leyna MD PhD Lecturer<sup>c</sup>, Saman Fahimi MD PhD Postdoctoral  
11 Research Fellow<sup>a</sup>, Enju Liu MD PhD Research Scientist<sup>a</sup>, Wafaie W Fawzi DrPH  
12 MBBS MPH MS Professor<sup>a,b,d</sup>, Zohra Lukmanji MSc Nutrition Consultant<sup>e</sup>, Japhet  
13 Killewo MBChB DPH MSc PhD Professor<sup>c</sup>, Frank Sacks ScD MD Professor<sup>d</sup>, Goodarz  
14 Danaei ScD MD MS Assistant Professor<sup>a,b</sup>  
15

16  
17  
18 <sup>a</sup> Department of Global Health and Population, Harvard T.H. Chan School of Public  
19 Health, Boston, Massachusetts, USA

20  
21 <sup>b</sup> Department of Epidemiology, Harvard T.H. Chan School of Public Health, Boston,  
22 Massachusetts, USA

23  
24 <sup>c</sup> Department of Epidemiology & Biostatistics, School of Public Health, Muhimbili  
25 University of Health and Allied Sciences, Dar es Salaam, United Republic of Tanzania.

26  
27 <sup>d</sup> Department of Nutrition, Harvard T.H. Chan School of Public Health, Boston,  
28 Massachusetts, USA

29  
30 <sup>e</sup> World food program, Dar es Salaam and Tumaini Hospital, Dar es salaam, Tanzania  
31

32  
33 **Correspondence to:** Goodarz Danaei, MD, ScD

34  
35 677 Huntington Avenue, 1107, Boston MA 02115

36  
37 [gdanaei@hsph.harvard.edu](mailto:gdanaei@hsph.harvard.edu)

38  
39 Telephone Number: +1 617 432 5722

40  
41 **Word count:** 3230  
42  
43  
44  
45  
46  
47  
48  
49  
50  
51  
52  
53  
54  
55  
56  
57  
58  
59  
60

## ABSTRACT

**Objective:** To assess the dietary determinants of serum total cholesterol.

**Design:** Cross-sectional population-based study.

**Setting:** Peri-urban region of Dar es Salaam, Tanzania.

**Participants:** 356 adults aged 40 years and older from the Dar es Salaam Urban Cohort Hypertension Study (DUCS-HTN).

**Main outcome measure:** Serum total cholesterol measured using a point of care device.

**Results:** Mean serum total cholesterol level was 203 mg/dL (Interquartile range (IQR) 169 to 235 mg/dL) in women and 183 mg/dL (IQR 149 to 215 mg/dL) in men. After adjustment for major demographic, socioeconomic and lifestyle factors, participants who reported using palm oil as the major cooking oil had serum total cholesterol higher by 17 mg/dL (95% confidence interval 4 to 30 mg/dL) compared with those who reported using sunflower, groundnut, corn or other oils. Higher meat consumption (P for trend=0.03) and lower consumption of fruits and vegetables were also associated (P for trend=0.01) with higher serum total cholesterol.

**Conclusions:** Use of palm oil for cooking is associated with higher serum total cholesterol levels in Tanzania. Reduction of saturated fat content of edible oil may be explored as a population-based strategy for the primary prevention of cardiovascular diseases.

**Key words:** cholesterol, palm oil, diet, nutrition, Tanzania, Sub-Saharan Africa

## STRENGTHS AND LIMITATIONS OF THIS STUDY

- This is the first population-based study to report an association between using palm oil for cooking and serum total cholesterol in East Africa.
- A reliable point-of care- lipid testing system was used to measure serum total cholesterol that has good clinical agreement with laboratory reference methods.
- Potential confounders of the association between diet and serum total cholesterol were systematically measured and adjusted for, increasing the validity of findings.
- Only serum total cholesterol was measured instead of a full lipid panel, due to logistic and financial limitations.
- The assessment of diet using any method is prone to measurement error, which may have resulted in bias, although differential misreporting of cooking oil by cholesterol level is unlikely.

## INTRODUCTION

Sub-Saharan Africa is facing a burgeoning epidemic of non-communicable diseases (NCDs) due to changing demographic profiles, epidemiologic transition, urbanization, and lifestyle changes as a result of economic development as well as increasing survival of HIV patients.[1, 2] In 2015, one third of all estimated NCD deaths in Sub-Saharan Africa were due to cardiovascular diseases (CVD).[3] By 2030, the share of all deaths attributable to CVD is projected to increase by almost 40% in sub-Saharan Africa.[3]

Dyslipidemia is a well-known risk factor for ischemic heart disease (IHD), stroke, and other vascular diseases.[4, 5] In middle-aged adults, IHD mortality is lower by as much as 30 to 50% for every 1 mmol/L (38.6mg/dL) lower serum total cholesterol.[4] Sub-Saharan Africans have historically had a favorable lipid profile.[6] However, hyperlipidemia is becoming increasingly common in these countries, especially in urban areas.[7-9] It is estimated that thirty-four percent of ischemic heart disease deaths in Tanzania are attributable to dyslipidemia.[10]

Previous studies in Tanzania have reported an association between higher intake of meat and lower intake of fish and green vegetables with higher serum total cholesterol.[11-15] Two of these studies were conducted in Bantu populations whose diet differs substantially from that of other ethnic groups in Tanzania.[14, 15] The other studies either did not report the magnitude of the association,[12] or did not adjust for potential confounders of the relationship between diet and serum total cholesterol.[11, 13] A better understanding of dietary determinants of dyslipidemia in Tanzania will be valuable in designing population-level interventions to reduce the growing CVD burden. We conducted a cross-sectional population-based study to assess the determinants of serum total cholesterol in adults in Dar es Salaam.

## METHODS

### Study design and population

The Dar es Salaam Health and Demographic Surveillance System (HDSS) is a demographic surveillance system in Ukonga and Gongo la Mboto wards of Dar es Salaam, Tanzania with over 100,000 enumerated individuals living in 21,000 households followed since 2011/12. For the DUCS Hypertension Study (DUCS-HTN), we randomly selected one large and one small neighborhood in the HDSS and contacted adult residents aged 40 years and older, who had been registered in the HDSS database in 2011 or 2012. A random subsample of one-fifth of the eligible participants was selected for additional assessment of diet and measurement of serum total cholesterol. The size of this subsample was determined largely based upon the availability of resources. Pregnant women and those who were physically and mentally incapable of completing the interview and measurements were excluded. The participant selection flowchart is shown in figure 1. Face-to-face interviews and measurements were conducted in participant's home from March to June 2014 by six trained interviewers. All interviewers had previous experience conducting public health surveys. For this study, interviewers received five days of training and two days of field practice in a nearby neighborhood. At least three attempts were made to contact all potential participants. Written informed consent was obtained from all participants.

The study protocol was approved by the Institutional Review Board of the Harvard TH Chan School of Public Health and the Research and Publications Committee of Muhimbili University of Health and Allied Sciences.

### Measurements

Non-fasting serum total cholesterol was measured from 20 micro-liters of finger-prick capillary blood samples using Cardiochek PA devices (Polymer Technology Systems Inc, IN, USA).<sup>[16, 17]</sup> Data on diet was collected using a semi-quantitative food frequency questionnaire (FFQ). The FFQ assessed intake of 179 food and drink items over the past 30 days. A shorter 85-item version of this instrument has been previously used in Tanzania.<sup>[18]</sup> Nutrient intakes were calculated by multiplying the frequency of food consumption measured from FFQ by the nutrient content of the specified

1  
2  
3 portion size using the Tanzanian food composition table.[19] An additional question  
4 was asked to assess the main type of oil used for cooking.  
5

6  
7 All participants completed a socio-demographic and lifestyle questionnaire and had their  
8 height, weight, waist circumference, hip circumference, and blood pressure measured by  
9 trained interviewers. Body mass index was calculated as weight (kg) divided by height  
10 (m) squared, and categorized as normal (<25.0), overweight (25.0 to <30.0), and obese  
11 ( $\geq 30.0$ ).[20] Some demographic information (age, sex, neighborhood, components of  
12 wealth index) was taken from the HDSS baseline interview, which was conducted from  
13 2011 to 2012. Physical activity was assessed using the Global Physical Activity  
14 Questionnaire in the domains of work, transportation, and leisure,[21] and categorized  
15 into tertiles of Metabolic Equivalent (MET) hours per week. To measure socioeconomic  
16 status, we created a household wealth index by principal component analysis of  
17 household characteristics (floor material, roof material, wall material, electricity),  
18 household asset ownership (television, radio, shop, sewing machine, sofa, fan, iron, stove  
19 with oven, stove without oven, dining table, cupboard, watch, mobile phone, bike,  
20 motorcycle, cart, car, motorboat), and animal ownership (goats, sheep, chicken/ducks,  
21 pigs). The household wealth index was categorized into tertiles.  
22  
23  
24  
25  
26  
27  
28  
29  
30  
31

### 32 **Statistical analysis**

33  
34 Participants with implausible dietary data (total energy intake <500 or >5000  
35 kcal/day), and with missing data on serum total cholesterol and/or any of the potential  
36 covariates were excluded from the analysis.  
37  
38  
39

40 Mean differences and 95% confidence intervals in serum total cholesterol across  
41 categories of selected independent variables were estimated using multivariable linear  
42 regression. Variables were included in the model based on a-priori knowledge of  
43 lifestyle and socio-demographic determinants of diet and serum total cholesterol. Chi-  
44 square tests were used to assess binary variables, F-tests were used for categorical  
45 variables and tests of linear trend based on median value within each category for  
46 ordinal variables with a linear association with serum total cholesterol (i.e. age, wealth  
47 index, and food consumption categories). We adjusted for interviewer to remove the  
48 effect of any extraneous variation in measurement of subjective risk factors across  
49 interviewers.[22, 23] We examined interactions of potential determinants of serum  
50  
51  
52  
53  
54  
55  
56  
57  
58  
59  
60

total cholesterol with sex, but no interactions were statistically significant at 0.2 level, so we did not include these product terms in the final model.

All analyses were performed using STATA software version 13.1 (STATA Corporation, College Station, Texas).

## RESULTS

A total of 420 participants were interviewed for the biomarker subsample. Among these, data on serum total cholesterol and selected covariates was available for 399 participants. We excluded 43 participants due to implausible caloric intake, resulting in a sample of 356 participants (figure 1).

Slightly less than half (42%) of the participants (n=356) were men. Mean age of men was 55 years (SD 11), and that of women was 52 (SD 10). About 44% of the women (n=207) and 19% of men (n=149) were obese, and about one third of men and women were overweight. Mean energy intake per day was about 2500 kcal (table 1). About three-quarters of participants reported using palm oil as the major cooking oil and the rest reported mainly using sunflower oil (20.5%). Other less commonly used cooking oils were groundnut (0.6%), olive (0.6%), corn (0.3%), or other oils (0.6%). Thirty-six percent of men and 53% of women were hypercholesterolemic (i.e. had total cholesterol  $\geq 200$  mg/dL). Mean serum total cholesterol in women was 203 mg/dL (95% confidence interval 196 to 211 mg/dL) and was significantly higher than that of men at 183 mg/dL (95% confidence interval 175 to 192 mg/dL). Serum total cholesterol levels were higher in older age groups.



**Table 1.** Participants' characteristics in DUCS-HTN biomarker sub-study, 2014

| Variable                            | All (n=356) | Men (n=149) | Women (n=207) | Use palm oil (n=274) | Use other cooking oil (n=82) |
|-------------------------------------|-------------|-------------|---------------|----------------------|------------------------------|
| <b>Age</b>                          |             |             |               |                      |                              |
| 40-49                               | 152 (43)    | 57 (38)     | 95 (46)       | 123 (45)             | 29 (35)                      |
| 50-59                               | 117 (33)    | 45 (30)     | 72 (35)       | 82 (30)              | 35 (43)                      |
| 60 and above                        | 87 (24)     | 47 (32)     | 40 (19)       | 69 (25)              | 18 (22)                      |
| <b>Employment status</b>            |             |             |               |                      |                              |
| Unemployed                          | 85 (24)     | 14 (9)      | 71 (34)       | 70 (26)              | 15 (18)                      |
| Employed (includes self-retired)    | 244 (69)    | 115 (77)    | 129 (62)      | 183 (67)             | 61 (74)                      |
| Retired                             | 27 (8)      | 20 (13)     | 7 (3)         | 21 (8)               | 6 (7)                        |
| <b>Household wealth index</b>       |             |             |               |                      |                              |
| Tertile 1, Poorest                  | 119 (33)    | 50 (34)     | 69 (33)       | 109 (40)             | 10 (12)                      |
| Tertile 2                           | 119 (33)    | 54 (36)     | 65 (31)       | 90 (33)              | 29 (35)                      |
| Tertile 3, Wealthiest               | 118 (33)    | 45 (30)     | 73 (35)       | 75 (27)              | 43 (52)                      |
| <b>BMI (kg/m<sup>2</sup>)</b>       |             |             |               |                      |                              |
| Underweight (<18.50)                | 20 (6)      | 14 (9)      | 6 (3)         | 19 (7)               | 1 (1)                        |
| Normal weight (18.50-<25.00)        | 103 (29)    | 58 (39)     | 45 (22)       | 91 (33)              | 12 (15)                      |
| Overweight (25-<30.00)              | 115 (32)    | 49 (33)     | 66 (32)       | 81 (30)              | 34 (41)                      |
| Obese (≥ 30.00)                     | 118 (33)    | 28 (19)     | 90 (44)       | 83 (30)              | 35 (43)                      |
| <b>Physical activity</b>            |             |             |               |                      |                              |
| Tertile 1, (0-14 MET-hours/week)    | 128 (36)    | 47 (32)     | 81 (39)       | 96 (35)              | 32 (39)                      |
| Tertile 2, (15-112 MET-hours/week)  | 111 (31)    | 40 (27)     | 71 (34)       | 86 (31)              | 25 (30)                      |
| Tertile 3, (113-840 MET-hours/week) | 117 (33)    | 62 (42)     | 55 (27)       | 92 (34)              | 25 (30)                      |
| <b>Alcohol drinking<sup>a</sup></b> |             |             |               |                      |                              |

| Variable                                            | All (n=356)          | Men (n=149)          | Women (n=207)        | Use palm oil (n=274) | Use other cooking oil (n=82) |
|-----------------------------------------------------|----------------------|----------------------|----------------------|----------------------|------------------------------|
| Non-drinker                                         | 294 (83)             | 106 (71)             | 188 (91)             | 225 (82)             | 69 (84)                      |
| <b>Smoking</b>                                      |                      |                      |                      |                      |                              |
| Non-smoker                                          | 284 (81)             | 86 (59)              | 198 (97)             | 210 (78)             | 74 (90)                      |
| Former smoker                                       | 45 (13)              | 41 (28)              | 4 (2)                | 38 (14)              | 7 (9)                        |
| Current smoker                                      | 23 (7)               | 20 (13)              | 3 (1)                | 22 (8)               | 1 (1)                        |
| <b>DIETARY VARIABLES</b>                            |                      |                      |                      |                      |                              |
| <b>Total caloric intake</b> (kcal/day) <sup>b</sup> | 2414<br>(1703, 3216) | 2629<br>(1756, 3216) | 2329<br>(1617, 3209) | 2369<br>(1654, 3150) | 2775<br>(1861, 3606)         |
| <b>Palm oil as major cooking oil</b>                | 274 (77)             | 119 (80)             | 155 (75)             |                      |                              |
| <b>Meat intake</b>                                  |                      |                      |                      |                      |                              |
| <1 serving/week                                     | 42 (12)              | 22 (15)              | 20 (10)              | 36 (13)              | 6 (7)                        |
| 1-6 servings/week                                   | 177 (50)             | 56 (38)              | 121 (58)             | 145 (53)             | 32 (39)                      |
| ≥1 servings/day                                     | 137 (39)             | 71 (48)              | 66 (32)              | 93 (34)              | 44 (54)                      |
| <b>Fish intake</b>                                  |                      |                      |                      |                      |                              |
| < 1 serving/week                                    | 42 (12)              | 14 (9)               | 28 (14)              | 31 (11)              | 11 (13)                      |
| 1-7 servings/week                                   | 202 (57)             | 79 (53)              | 123 (59)             | 154 (56)             | 48 (59)                      |
| > 1 servings/day                                    | 112 (31)             | 56 (38)              | 56 (27)              | 89 (32)              | 23 (28)                      |
| <b>Dairy intake</b>                                 |                      |                      |                      |                      |                              |
| < 1 serving/week                                    | 164 (46)             | 65 (44)              | 99 (48)              | 136 (50)             | 28 (34)                      |
| 1-6 servings/week                                   | 137 (39)             | 67 (45)              | 70 (34)              | 99 (36)              | 38 (46)                      |
| ≥ 1 servings/day                                    | 55 (15)              | 17 (11)              | 38 (18)              | 39 (14)              | 16 (20)                      |
| <b>Fruit and vegetable</b>                          |                      |                      |                      |                      |                              |
| < 5 servings/day                                    | 123 (35)             | 49 (33)              | 74 (36)              | 101 (37)             | 22 (27)                      |
| 5-7 servings/day                                    | 70 (20)              | 27 (18)              | 43 (21)              | 54 (20)              | 16 (20)                      |

| Variable                                               | All (n=356)  | Men (n=149)  | Women (n=207) | Use palm oil (n=274) | Use other cooking oil (n=82) |
|--------------------------------------------------------|--------------|--------------|---------------|----------------------|------------------------------|
| >7 servings/day                                        | 163 (46)     | 73 (49)      | 90 (43)       | 119 (43)             | 44 (54)                      |
| <b>Nuts and legumes</b>                                |              |              |               |                      |                              |
| < 1 serving/week                                       | 29 (8)       | 8 (5)        | 21 (10)       | 17 (6)               | 12 (15)                      |
| 1-7 servings/week                                      | 206 (58)     | 90 (60)      | 116 (56)      | 162 (59)             | 44 (54)                      |
| > 1 servings/day                                       | 121 (34)     | 51 (34)      | 70 (34)       | 95 (35)              | ...                          |
| <b>Fat intake<sup>b</sup></b>                          |              |              |               |                      |                              |
| Total fat (grams/day)                                  | 87 (58, 121) | 90 (56, 124) | 86 (60, 119)  | 85 (54, 119)         | 98 (68, 125)                 |
| Saturated fat (grams/day)                              | 49 (33, 70)  | 53 (31, 74)  | 47 (34, 66)   | 49 (32, 69)          | 50 (39, 71)                  |
| Polyunsaturated fat                                    | 8 (5, 13)    | 9 (5, 12)    | 7 (4, 13)     | 7 (4, 12)            | 10 (6, 17)                   |
| <b>Cholesterol</b>                                     |              |              |               |                      |                              |
| Serum total cholesterol (mg/dl) <sup>c</sup>           | 195 (3)      | 183 (4)      | 203 (4)       | 199 (3)              | 181 (5)                      |
| Hypercholesterolemia <sup>d</sup>                      | 164 (46)     | 54 (36)      | 110 (53)      | 135 (49)             | 29 (35)                      |
| Cholesterol level was previously checked               | 30 (8)       | 7 (5)        | 23 (11)       |                      |                              |
| Notified by doctors that they had hypercholesterolemia | 13 (8)       | 1 (2)        | 12 (11)       |                      |                              |
| Now taking cholesterol lowering medications            | 9 (3)        | 1 (1)        | 8 (4)         |                      |                              |

Number (%) reported for all variables, except as specified b and c below

<sup>a</sup> According to report of drinking alcohol in the past 30 days

<sup>b</sup> Total caloric and fat intake, which is reported as median (interquartile range)

<sup>c</sup> Serum total cholesterol, reported as mean (standard error)

<sup>d</sup> Hypercholesterolemia defined as total cholesterol  $\geq$  200mg/dL

Those who reported using palm oil as the major cooking oil had serum total cholesterol levels higher by 14 mg/dL (95% confidence interval 1 to 26 mg/dL) compared with those who reported using sunflower or other oils (table 2, figure 2. After adjustment for major demographic, socioeconomic and lifestyle factors, participants who used palm oil for cooking had 17mg/dl (95% confidence interval 4 to 30 mg/dL) higher serum total cholesterol. Serum total cholesterol was also higher in participants who ate more meat (P for trend 0.026). Specifically, those who ate more than one serving of meat per day had 16 mg/dL (95% confidence interval -4 to 37 mg/dL) higher serum total cholesterol compared with those who ate less than one serving per week. Consumption of more than seven servings of fruits and vegetables per day was associated with 13 mg/dL (95% confidence interval -28 to 3 mg/dL) lower serum total cholesterol, compared to consumption of fewer than five servings per day (P for trend 0.011). Adjusted for all other covariates, a combination of using palm oil for cooking, eating more than one serving of meat per day and fewer than one five servings of fruits and vegetables per day was associated with 46 mg/dL (95% confidence interval 17 to 75 mg/dL) (figure 2)

**Table 2.** Adjusted mean differences for serum total cholesterol (mg/dL) for socio-demographic, dietary and lifestyle characteristics; DUCS-HTN biomarker sub-study (n=356)

| Variable                         | Interviewer-adjusted mean difference (95% CI) | P Value <sup>a</sup> | Fully-adjusted <sup>b</sup> mean difference (95% CI) | P Value <sup>a</sup> |
|----------------------------------|-----------------------------------------------|----------------------|------------------------------------------------------|----------------------|
| <b>Major cooking oil</b>         |                                               |                      |                                                      |                      |
| Sunflower, groundnut or corn oil | Reference                                     |                      | Reference                                            |                      |
| Palm oil                         | 14 (1, 26)                                    | 0.031                | 17 (4, 30)                                           | 0.011                |
| <b>Age</b>                       |                                               | 0.145                |                                                      | 0.064                |
| 40-49                            | Reference                                     |                      | Reference                                            |                      |
| 50-59                            | 3 (-9, 15)                                    |                      | 7 (-5, 20)                                           |                      |
| 60 and above                     | 10 (-3, 23)                                   |                      | 15 (0, 31)                                           |                      |
| <b>Sex</b>                       |                                               |                      |                                                      |                      |
| Male                             | Reference                                     |                      | Reference                                            |                      |
| Female                           | 22 (11, 32)                                   | <0.001               | 28 (16, 39)                                          | <0.001               |
| <b>Employment status</b>         |                                               | 0.503                |                                                      | 0.616                |
| Unemployed                       | Reference                                     |                      | Reference                                            |                      |
| Employed <sup>c</sup>            | -7 (-20, 5)                                   |                      | 7 (-8, 22)                                           |                      |
| Retired                          | -2 (-24, 21)                                  |                      | 9 (-15, 33)                                          |                      |

| Variable                                   | Interviewer-adjusted mean difference (95% CI) | P Value <sup>a</sup> | Fully-adjusted <sup>b</sup> mean difference (95% CI) | P Value <sup>a</sup> |
|--------------------------------------------|-----------------------------------------------|----------------------|------------------------------------------------------|----------------------|
| <b>Household Wealth Index</b>              |                                               | 0.616                |                                                      | 0.814                |
| 1, Poorest                                 | Reference                                     |                      | Reference                                            |                      |
| 2                                          | -9 (-22, 4)                                   |                      | -7 (-20, 6)                                          |                      |
| 3, Wealthiest                              | -2 (-15, 11)                                  |                      | 0 (-14, 14)                                          |                      |
| <b>Meat intake</b>                         |                                               | 0.559                |                                                      | 0.026                |
| <1 serving/week                            | Reference                                     |                      | Reference                                            |                      |
| 1-6 servings/week                          | -1 (-19, 16)                                  |                      | -1 (-19, 17)                                         |                      |
| ≥1 servings/day                            | 3 (-16, 21)                                   |                      | 16 (-4, 37)                                          |                      |
| <b>Fruit and vegetable intake</b>          |                                               | 0.023                |                                                      | 0.011                |
| < 5 servings/day                           | Reference                                     |                      | Reference                                            |                      |
| 5-7 servings/day                           | -8 (-23, 7)                                   |                      | -7 (-22, 9)                                          |                      |
| > 7 servings/day                           | -16 (-30, -2)                                 |                      | -13 (-28, 3)                                         |                      |
| <b>Fish intake</b>                         |                                               | 0.579                |                                                      | 0.639                |
| < 1 serving/week                           | Reference                                     |                      | Reference                                            |                      |
| 1-7 servings/week                          | -10 (-28, 7)                                  |                      | -7 (-25, 11)                                         |                      |
| >1 servings/day                            | -11 (-32, 10)                                 |                      | -7 (-29, 15)                                         |                      |
| <b>Dairy intake</b>                        |                                               | 0.853                |                                                      | 0.628                |
| < 1 serving/week                           | Reference                                     |                      | Reference                                            |                      |
| 1-6 servings/week                          | -9 (-22, 4)                                   |                      | -8 (-21, 6)                                          |                      |
| ≥ 1 servings/day                           | -1 (-17, 15)                                  |                      | -2 (-19, 15)                                         |                      |
| <b>Total energy intake (Per 1000 kcal)</b> | -5 (-11, 1)                                   | 0.095                | -5 (-12, 2)                                          | 0.184                |
| <b>Physical activity tertile</b>           |                                               | 0.972                |                                                      | 0.406                |
| 1, least active                            | Reference                                     |                      | Reference                                            |                      |
| 2                                          | 2 (-12, 15)                                   |                      | 3 (-11, 17)                                          |                      |
| 3, most active                             | 1 (-14, 16)                                   |                      | 8 (-8, 24)                                           |                      |
| <b>Alcohol consumption<sup>d</sup></b>     |                                               |                      |                                                      |                      |
| Non-drinker                                | Reference                                     |                      |                                                      |                      |
| Drinker                                    | -7 (-21, 7)                                   | 0.308                | -2 (-17, 12)                                         | 0.752                |

<sup>a</sup> F test for categorical variables (major cooking oil, sex, employment status, alcohol consumption); t test for continuous variables (total energy intake); test of trend based on median value in each category for ordinal categorical variables (age category, wealth tertile, food consumption and physical activity categories)

<sup>b</sup> Adjusted for covariates in column 1 as well as interviewer

<sup>c</sup> Self-employed, or government job, or job in private company

<sup>d</sup> According to report of drinking alcohol in the past 30 days

Only 11% of women and 5% of men reported having their cholesterol levels checked at least once in their lifetime (figure 3). Among those with hypercholesterolemia (n=164), 2% of men (1 of 54), and 11% of women (12 of 110) reported being notified by doctors about it, and about 2% of men and 7% of women reported taking cholesterol-lowering medications.

## DISCUSSION

In this cross-sectional study among middle-aged and older adults in Dar es Salaam, Tanzania, we found a high prevalence of dyslipidemia. About a third of men and half of women had serum total cholesterol levels greater than or equal to 200mg/dL. Serum total cholesterol was higher by 17mg/dL among those who used palm oil as the major cooking oil, and showed a significant increasing trend with higher consumption of meat (P=0.03) and lower consumption of fruits and vegetables (P=0.01).

Mean serum total cholesterol levels for men and women were similar to that reported in other studies done in other urban populations in Tanzania.[18, 24, 25] A repeated cross-sectional study reported an increase over time in the prevalence of hypercholesterolemia in Dar es Salaam with a prevalence of about 17% in men and 7% in women in 1987 versus 30% in men and 50% in women in 1998.[24] The prevalence of hypercholesterolemia in our sample was in agreement with this trend, and also higher than that reported by studies conducted between 2008-2014 in rural Uganda (3% men, 8% women),[9] peri-urban Nigeria (2% men, 6% women),[8] and blacks in urban South-Africa (25% men, 23% women),[26] but is lower than that reported in a study from Senegal (54% men, 61% women) that included both urban and rural participants.[27]

Our estimated association between palm oil use versus unsaturated vegetable oil use is consistent with findings from dietary observational studies and intervention trials. A recent meta-analysis of 30 dietary intervention trials comparing diets rich in palm oil

1  
2  
3 with diets rich in vegetable oils low in saturated fatty acids showed significantly higher  
4 total (0.35 mmol/L) and LDL (0.24 mmol/L) cholesterol, and slightly higher HDL  
5 cholesterol (0.02mmol/L) 2 to 16 weeks after intervention.[28] In addition, a large  
6 case-control study conducted in Costa Rica, found that palm oil use was independently  
7 associated with 33% higher odds of myocardial infarction as compared to soybean oil  
8 use,[29] suggesting that the potentially beneficial effects of palm oil through its high  
9 vitamin A and E and oleic acid content (about 40% of total fat), may not be sufficient to  
10 compensate for the deleterious effects of its high saturated fat content, as compared to  
11 soybean oil. Higher meat consumption has previously been reported to be related to  
12 higher serum total cholesterol in Tanzania by comparing rural, urban, and pastoral  
13 populations.[12, 13] Similar to our finding, they found that consumption of meat once  
14 per day was associated with 24 mg/dL higher serum total cholesterol levels, after  
15 adjusting for age, select dietary components and resting energy expenditure.  
16 Observational studies have reported lower LDL cholesterol by about 0.06 mmol/L for  
17 every additional serving of fruits or vegetables.[30-32] The magnitude of 13 mg/dL  
18 reduction in serum total cholesterol that we found for six or more servings of fruits and  
19 vegetables per day is consistent with the reductions in LDL-cholesterol seen in these  
20 studies. We did not find significant associations between serum total cholesterol and  
21 fish intake, as reported in previous studies.[12, 13] This could have been due to  
22 insufficient statistical power or measurement error in fish intake.  
23  
24  
25  
26  
27  
28  
29  
30  
31  
32  
33  
34  
35  
36  
37

38 Palm oil is obtained mostly from the middle section (pulp) of the fruits of the tropical  
39 plant *Elaeis guineensis*.[33] Compared with most other vegetable oils, it contains less  
40 unsaturated fat and more saturated fat (about 40 to 50% of total fat content) with the  
41 majority being palmitic acid.[33] However, compared with saturated fat from animal  
42 sources, palm oil may have a smaller impact on serum cholesterol because almost 70% of  
43 the palmitic acid in palm oil is located in the first and third position of the triglycerides,  
44 which is less absorbable than palmitic acid in the second position of the triglycerides  
45 which is the major position of palmitic acid in animal fats.[34, 35] Despite these  
46 biological differences, evidence from both observational and experimental studies, as  
47 summarized above, points to harmful effects of palm oil on serum cholesterol and CVD  
48 when substituted for unsaturated fatty acids.  
49  
50  
51  
52  
53  
54  
55  
56  
57  
58  
59  
60

1  
2  
3  
4  
5 Our study has several limitations. First, due to logistic and financial limitations, we  
6 measured serum total cholesterol instead of a full lipid panel. However, data from recent  
7 meta-analysis of randomized trials suggests that the effect of substituting palm oil for  
8 vegetable oils low in saturated fat on LDL cholesterol levels is far greater than that on  
9 HDL.[28] Second, although the FFQ specified portion size, the assessment of diet  
10 using any method is prone to measurement error which may have resulted in bias.  
11 However, it is quite unlikely that participants with higher cholesterol levels  
12 differentially misreport using palm oil in cooking. There are some important strengths  
13 of this study. To our knowledge, this is the first population-based study to report an  
14 association between using palm oil for cooking and serum total cholesterol in East  
15 Africa. We used a reliable point-of-care- lipid testing system that has good clinical  
16 agreement with laboratory reference methods for total cholesterol.[17] We  
17 systematically collected data on and adjusted for potential confounders of the  
18 association between diet and serum total cholesterol, increasing the validity of our  
19 findings. Our findings are generalizable to other peri-urban areas in Tanzania, and  
20 possibly other East African countries.  
21  
22  
23  
24  
25  
26  
27  
28  
29  
30  
31  
32

33 Were our findings to be replicated in other studies in East Africa using different study  
34 designs, they could have important implications for nutritional policies aimed at CVD  
35 prevention. Palm oil is now the major edible oil in Tanzania. More than half of the palm  
36 oil is imported,[36] and it is the second most imported agricultural commodity.[37] In  
37 our study population, about three-quarters of participants used palm oil as the major  
38 cooking oil with 92% of participants (n=119) in the lowest tertile of wealth using palm  
39 oil. Policy interventions to address composition of dietary fat have previously been  
40 implemented in Seychelles and Mauritius.[38, 39] In the early 1990s, Seychelles  
41 implemented a nationwide program that included increasing use of unsaturated  
42 vegetable oils, which may have contributed to the fairly high rate of decline in age-  
43 standardized CVD mortality of 44% in men and 28% in women over a 22-year  
44 period.[38,40, 41] A national NCD prevention program was also implemented in  
45 Mauritius in the late 1980s to reduce saturated fat content of cooking oil by changing  
46 the government subsidized 'ration oil' from palm oil to soybean oil. The magnitude of  
47  
48  
49  
50  
51  
52  
53  
54  
55  
56  
57  
58  
59  
60



1  
2  
3 reduction in serum total cholesterol of 0.8mmol/L (31 mg/dL) over a period of 5  
4 years,[39, 42], is compatible with the estimated impact of replacing palm oil with  
5 unsaturated vegetable oil estimated in a recent meta-analysis of dietary intervention  
6 trials.[43]  
7  
8  
9

10  
11 Similar policies can be considered to reduce palm oil intake in Tanzania. However, it  
12 should be noted that edible oils are viewed as necessities,[44] and increasing their price  
13 (e.g. by taxation) without providing healthier alternatives at comparable prices may  
14 have unintended adverse consequences on overall energy consumption or food  
15 security.[45-47] Reducing saturated fat in edible oil by mixing it with other  
16 unsaturated oils has been proposed as a potential intervention in Costa Rica, Singapore  
17 and India.[29, 48, 49] and could be a feasible short-term intervention in Tanzania. The  
18 long-term focus should be on incentivizing the production, import and use of healthier  
19 oils. Our results also indicate that policies to increase fruit and vegetable intake, and to  
20 reduce meat intake would be beneficial in lowering serum cholesterol. In the meantime,  
21 there is an urgent need to improve the capacity of the healthcare system in Tanzania to  
22 improve the diagnosis and treatment of dyslipidemias as recommended by the  
23 WHO.[50] Some of the first steps in this regard are: training of healthcare  
24 professionals, developing and adopting clinical guidelines for diagnosis and treatment of  
25 dyslipidemia and provision of appropriate lab equipment to district and local hospitals.  
26  
27  
28  
29  
30  
31  
32  
33  
34  
35  
36  
37  
38  
39  
40  
41  
42  
43  
44  
45  
46  
47  
48  
49  
50  
51  
52  
53  
54  
55  
56  
57  
58  
59  
60

## WHAT THIS PAPER ADDS

### What is already known on this subject

- Dyslipidemia is a well-known risk factor for cardiovascular diseases and is becoming increasingly common in Sub-Saharan Africa, especially in urban areas.
- Diet is an established lifestyle determinant of cardiovascular diseases, and diet modification can be an effective primary prevention strategy.
- Evidence on the dietary determinants of dyslipidemia in sub-Saharan Africa is limited and unclear with regard to the magnitude of the association.

### What this study adds

- This cross-sectional study in a peri-urban Tanzanian population suggests that the prevalence of undiagnosed and untreated dyslipidemia is quite high among middle aged and older adults.
- Use of cooking oil low in saturated fat, reducing meat consumption to less than 1 serving per week, and increasing fruit and vegetable consumption to 7 or more servings per day may lower mean serum total cholesterol levels up to 46 mg/dL.

**CONTRIBUTORS** GD, JK, GHL and RMZ conceived and designed the study. GD obtained the funding. SSK and SF analyzed the data. GD and SSK interpreted the data and drafted the article, which was revised critically for substantive content by all authors, who approved the final version for publication. GD, SSK, SF and RMZ had full access to all of the data (including statistical reports and tables) in the study and can take responsibility for the integrity of the data and the accuracy of the data analysis. GD is the study guarantor.

## ACKNOWLEDGEMENTS

We thank participants, interviewers, data entry clerks, administrative and support staff, who generously contributed time and effort for this study, and Patrick Kazonda for meticulous data management.

1  
2  
3 **FUNDING:** National Institute of Ageing through the Program on Global Demography  
4 of Ageing (PGDA 116508). SSK was supported by the Bernard Lown Scholars in  
5 Cardiovascular Health Program. RMZ was supported by an NIH T32 training grant  
6 (CA 09001). The sponsors had no influence on the design and conduct of the study;  
7 collection, management, analysis, and interpretation of the data; and preparation,  
8 review, or approval of the manuscript.  
9  
10  
11  
12

13  
14  
15 **COMPETING INTERESTS:** All authors have completed the ICMJE uniform  
16 disclosure form at [www.icmje.org/coi\\_disclosure.pdf](http://www.icmje.org/coi_disclosure.pdf) (available on request from the  
17 corresponding author) and declare: no support from companies for the submitted work;  
18 no relationships with companies that might have an interest in the submitted work in  
19 the previous three years; their spouses, partners, or children have no financial  
20 relationships that may be relevant to the submitted work; no non-financial interests that  
21 may be relevant to the submitted work.  
22  
23  
24  
25  
26  
27

28 **ETHICAL APPROVAL:** The study protocol was approved by the Institutional Review  
29 Board of the Harvard TH Chan School of Public Health and the Research and  
30 Publications Committee of Muhimbili University of Health and Allied Sciences. All  
31 participants gave informed consent.  
32  
33  
34  
35

36 **DATA SHARING:** No additional data available  
37

38 **TRANSPARENCY:** The lead authors affirm that the manuscript is an honest, accurate,  
39 and transparent account of the study being reported; that no important aspects of the  
40 study have been omitted; and that any discrepancies from the study as planned have  
41 been explained.  
42  
43  
44  
45  
46  
47  
48  
49  
50  
51  
52  
53  
54  
55  
56  
57  
58  
59  
60

## REFERENCES

1. Unwin N, Setel P, Rashid S et al. Noncommunicable diseases in sub-Saharan Africa: where do they feature in the health research agenda? *Bull World Health Organ* 2001;79(10):947-53.
2. Dalal S, Beunza JJ, Volmink J et al. Non-communicable diseases in sub-Saharan Africa: what we know now. *Int J Epidemiol.* 2011;40(4):885-901.
3. Mathers CD, Loncar D. Projections of global mortality and burden of disease from 2002 to 2030 [dataset]. *Plos Med.* 2006;3(11):e442.[cited 2016 March 02]. Available from: [http://www.who.int/healthinfo/global\\_burden\\_disease/projections/en/index.html](http://www.who.int/healthinfo/global_burden_disease/projections/en/index.html). Referenced in doi: 10.1371/journal.pmed.0030442.sd002
4. Mathers CD, Stevens GA, Mascarenhas MN. Global health risks: mortality and burden of disease attributable to selected major risks. Geneva, CH: World Health Organization; 2009.70p.
5. Prospective Studies Collaboration. Blood cholesterol and vascular mortality by age, sex, and blood pressure: a meta-analysis of individual data from 61 prospective studies with 55 000 vascular deaths. *Lancet.* 2007;370(9602):1829-39.
6. Farzadfar F, Finucane MM, Danaei G et al. National, regional, and global trends in serum total cholesterol since 1980: systematic analysis of health examination surveys and epidemiological studies with 321 country-years and 3.0 million participants. *Lancet.* 2011;377(9765):578-86.
7. Pessinaba S, Mbaye A, Yabeta GA et al. Prevalence and determinants of hypertension and associated cardiovascular risk factors: data from a population-based, cross-sectional survey in Saint Louis, Senegal. *Cardiovasc J Afr.* 2013;24(5):180-3.
8. Oluyombo R, Olamoyegun MA, Olaifa O et al. Cardiovascular risk factors in semi-urban communities in southwest Nigeria: Patterns and prevalence. *J Epidemiol Glob Health.* 2015;5(2):167-74.
9. Asiki G, Murphy GA, Baisley K et al. Prevalence of dyslipidaemia and associated risk factors in a rural population in South-Western Uganda: a community based survey. *PloS One.* 2015;10(5):e0126166.
10. Forouzanfar MH, Alexander L, Anderson HR et al. Global, regional, and national comparative risk assessment of 79 behavioural, environmental and occupational, and metabolic risks or clusters of risks in 188 countries, 1990–2013: a systematic

1  
2  
3 analysis for the Global Burden of Disease Study 2013 [dataset]. *Lancet*.  
4 2015;386(10010):2287-323. [cited 2016 March 02]. Available from:  
5 <http://ghdx.healthdata.org/gbd-data-tool>  
6  
7

- 8 11. Njelekela M, Ikeda K, Mtabaji J et al. Dietary habits, plasma polyunsaturated fatty  
9 acids and selected coronary disease risk factors in Tanzania. *East Afr Med J*.  
10 2005;82(11):572-8.  
11  
12 12. Njelekela M, Sato T, Nara Y et al. Nutritional variation and cardiovascular risk  
13 factors in Tanzania--rural-urban difference. *S Afr Med J*. 2003;93(4):295-9.  
14  
15 13. Njelekela M, Kuga S, Nara Y et al. Prevalence of obesity and dyslipidemia in  
16 middle-aged men and women in Tanzania, Africa: relationship with resting energy  
17 expenditure and dietary factors. *J Nutr Sci Vitaminol (Tokyo)*. 2002;48(5):352-8.  
18  
19 14. Pauletto P, Puato M, Angeli MT et al. Blood pressure, serum lipids, and fatty acids  
20 in populations on a lake-fish diet or on a vegetarian diet in Tanzania. *Lipids*.  
21 1996;31Suppl:S309-12.  
22  
23 15. Marcovina SM, Kennedy H, Bon GB et al. Fish intake, independent of apo(a) size,  
24 accounts for lower plasma lipoprotein(a) levels in Bantu fishermen of Tanzania:  
25 The Lugalawa Study. *Arterioscler Thromb Vasc Biol*. 1999;19(5):1250-6.  
26  
27 16. Matteucci E, Bartola LD, Rossi L et al. Improving CardioCheck PA analytical  
28 performance: three-year study. *Clin Chem Lab Med*. 2014;52(9):1291-6.  
29  
30 17. dos Santos Ferreira CE, França CN, Correr CJ, Zucker ML et al. Clinical  
31 correlation between a point-of-care testing system and laboratory automation for  
32 lipid profile. *Clinica Chimica Acta*. 2015;446:263-6.  
33  
34 18. Njelekela MA, Mpembeni R, Muhihi A et al. Gender-related differences in the  
35 prevalence of cardiovascular disease risk factors and their correlates in urban  
36 Tanzania. *BMC Cardiovasc Disord*. 2009;9:30.  
37  
38 19. Lukmanji Z, Hertzmark E, Mlingi N et al. Tanzania food composition tables  
39 [Internet]. Dar es Salaam, TZ: Muhimbili University of Health and Allied  
40 Sciences; Tanzania Food and Nutrition Centre; Harvard School of Public Health;  
41 2008 [cited 2015 March 15]. Available from:  
42 <https://www.hsph.harvard.edu/nutritionsource/food-tables/>  
43  
44 20. World Health Organization. Obesity: Preventing and Managing the Global  
45 Epidemic. Report of a WHO Consultation. [Internet]. Geneva, CH: World Health  
46  
47  
48  
49  
50  
51  
52  
53  
54  
55  
56  
57  
58  
59  
60

- 1  
2  
3 Organization; 2000 [cited 2016 March 18].253p. WHO Technical Report Series,  
4 No 894. Available from [http://whqlibdoc.who.int/trs/WHO\\_TRS\\_894.pdf](http://whqlibdoc.who.int/trs/WHO_TRS_894.pdf)  
5  
6  
7 21. World Health Organization. Prevention of Noncommunicable Diseases  
8 Department. Global Physical Activity Questionnaire (GPAQ) Analysis Guide  
9 [Internet]. Geneva, CH: World Health Organization; 2014 [cited 2014 January  
10 07].23p. Available from:  
11 [http://www.who.int/chp/steps/resources/GPAQ\\_Analysis\\_Guide.pdf](http://www.who.int/chp/steps/resources/GPAQ_Analysis_Guide.pdf)  
12  
13  
14 22. Davis RE, Couper MP, Janz NK et al. Interviewer effects in public health surveys.  
15 *Health Educ Res.* 2010;25(1):14-26.  
16  
17 23. Himelein K. Interviewer effects in subjective survey questions: evidence from  
18 Timor-Leste. *Int J Public Opin Res.* 2015:edv031.  
19  
20 24. Njelekela M, Negishi H, Nara Y et al. Cardiovascular risk factors in Tanzania: a  
21 revisit. *Acta Trop.* 2001;79(3):231-9.  
22  
23 25. Njelekela MA, Negishi H, Nara Y et al. Obesity and lipid profiles in middle aged  
24 men and women in Tanzania. *East Afr Med J.* 2002;79(2):58-64.  
25  
26 26. Peer N, Steyn K, Lombard C et al. Alarming rise in prevalence of atherogenic  
27 dyslipidaemia in the black population of Cape Town: the Cardiovascular Risk in  
28 Black South Africans (CRIBSA) study. *Eur J Prev Cardiol.* 2014;21(12):1549-56.  
29  
30 27. Doupa D, Seck SM, Dia CA et al. Dyslipidemia, obesity and other cardiovascular  
31 risk factors in the adult population in Senegal. *Pan Afr Med J.* 2014;19:181.  
32  
33 28. Sun Y, Neelakantan N, Wu Y et al. Palm Oil Consumption Increases LDL  
34 Cholesterol Compared with Vegetable Oils Low in Saturated Fat in a Meta-  
35 Analysis of Clinical Trials. *J Nutr.* 2015;145(7):1549-58.  
36  
37 29. Kabagambe EK, Baylin A, Ascherio A et al. The type of oil used for cooking is  
38 associated with the risk of nonfatal acute myocardial infarction in Costa Rica. *J*  
39 *Nutr.* 2005;135(11):2674-9.  
40  
41 30. Fornés NS, Martins IS, Hernan M et al. Food frequency consumption and  
42 lipoproteins serum levels in the population of an urban area, Brazil. *Rev Saude*  
43 *Publica.* 2000;34(4):380-7.  
44  
45 31. Mirmiran P, Noori N, Zavareh MB et al. Fruit and vegetable consumption and risk  
46 factors for cardiovascular disease. *Metabolism.* 2009;58(4):460-8.  
47  
48  
49  
50  
51  
52  
53  
54  
55  
56  
57  
58  
59  
60

- 1  
2  
3 32. Djoussé L, Arnett DK, Coon H et al. Fruit and vegetable consumption and LDL  
4 cholesterol: the national heart, lung, and blood institute family heart study. *Am J*  
5 *Clin Nutr*. 2004;79(2):213-7.  
6  
7  
8 33. Edem DO. Palm oil: Biochemical, physiological, nutritional, hematological and  
9 toxicological aspects: A review. *Plant Foods Hum Nutr* 2002;57(3-4):319-41.  
10  
11  
12 34. Zhao H, Lu Z, Bie X et al. [Analysis of positional distribution of fatty acids in  
13 triacylglycerols from lard by high performance liquid chromatography]. *Se pu*.  
14 2005;23(2):142-5.  
15  
16  
17 35. Hunter JE. Studies on effects of dietary fatty acids as related to their position on  
18 triglycerides. *Lipids*. 2001;36(7):655-68.  
19  
20  
21 36. KPMG BPA Co.Ltd. Potential opportunities for investors [Internet].Tabora, TZ:  
22 KPMG International; 2011 [cited 2016 March 18]. 44p. Available from:  
23 <http://mci.ei.columbia.edu/files/2012/12/kpmg-tabora-report.pdf>  
24  
25  
26 37. Tanzania Data Portal [Internet]. Dar es Salaam, TZ: Tanzania National Bureau of  
27 Statistics. 2014 [cited 2016 March 23]. Available from:  
28 [http://tanzania.opendataforafrica.org/uelwzeb/tanzania-fao-stat-water-resources-](http://tanzania.opendataforafrica.org/uelwzeb/tanzania-fao-stat-water-resources-agriculture-production-and-trade)  
29 [agriculture-production-and-trade](http://tanzania.opendataforafrica.org/uelwzeb/tanzania-fao-stat-water-resources-agriculture-production-and-trade)  
30  
31  
32 38. Bovet P, Viswanathan B, Shamlaye C et al. Addressing non-communicable diseases  
33 in the Seychelles: towards a comprehensive plan of action. *Glob Health Promot*.  
34 2010;17(2 suppl):37-40.  
35  
36  
37 39. Dowse GK, Gareeboo H, Alberti KGM et al. Changes in population cholesterol  
38 concentrations and other cardiovascular risk factor levels after five years of the  
39 non-communicable disease intervention programme in Mauritius. *BMJ*.  
40 1995;311(7015):1255-9.  
41  
42  
43 40. Stringhini S, Sinon F, Didon J et al. Declining stroke and myocardial infarction  
44 mortality between 1989 and 2010 in a country of the African region. *Stroke*.  
45 2012;43(9):2283-8.  
46  
47  
48 41. Bovet P, Romain S, Shamlaye C et al. Divergent fifteen-year trends in traditional  
49 and cardiometabolic risk factors of cardiovascular diseases in the Seychelles.  
50 *Cardiovasc Diabetol*. 2009;8(1):34.  
51  
52  
53 42. Uusitalo U, Feskens EJ, Tuomilehto J et al. Fall in total cholesterol concentration  
54 over five years in association with changes in fatty acid composition of cooking oil  
55 in Mauritius: cross sectional survey. *BMJ*. 1996;313(7064):1044-6.  
56  
57  
58  
59  
60



- 1  
2  
3 43. Fattore E, Bosetti C, Brighenti F et al. Palm oil and blood lipid-related markers of  
4 cardiovascular disease: a systematic review and meta-analysis of dietary  
5 intervention trials. *Am J Clin Nutr.* 2014;99(6):1331-50.  
6  
7  
8 44. Weliwita A, Nyange D, Tsujii H. Food demand patterns in Tanzania: A censored  
9 regression analysis of microdata. *Sri Lankan J Agric Econ.* 2011;5.  
10  
11  
12 45. Basu S, Babiarz KS, Ebrahim S et al. Palm oil taxes and cardiovascular disease  
13 mortality in India: economic-epidemiologic model. *BMJ* 2013;347:f6048.  
14  
15 46. Wodon QT, Tsimpo C, Backiny-Yetna P et al. Potential impact of higher food  
16 prices on poverty: summary estimates for a dozen west and central African  
17 countries [Internet]. Washington, DC: World Bank; 2008 [cited 2016 March 18].  
18 33p. World Bank Policy Research Working Paper No. 4745. Available from:  
19 <http://documents.worldbank.org/>  
20  
21  
22 47. Wodon QT, Zaman H. Rising food prices in Sub-Saharan Africa: Poverty impact  
23 and policy responses [Internet]. Washington, DC: World Bank; 2008 [cited 2016  
24 March 18]. 28p. World Bank Policy Research Working Paper No. 4738. Available  
25 from: <http://documents.worldbank.org/>  
26  
27  
28 48. Downs SM, Thow A-M, Ghosh-Jerath S et al. The feasibility of multisectoral  
29 policy options aimed at reducing trans fats and encouraging its replacement with  
30 healthier oils in India. *Health Policy Plan.* 2014:czu031.  
31  
32  
33 49. Ho O. Switching to healthier fare just got easier for eateries. The Straits Times  
34 [Internet]. Ministry of Communications and Information, Government of  
35 Singapore. 2015 [cited 2016 March 23]. Available from:  
36 [https://www.gov.sg/~media/gov/files/media/20150119\\_st\\_switching\\_to\\_healthier\\_fare\\_just\\_got\\_easier\\_for\\_eateriesOf1c.pdf](https://www.gov.sg/~media/gov/files/media/20150119_st_switching_to_healthier_fare_just_got_easier_for_eateriesOf1c.pdf)  
37  
38  
39  
40 50. Bloom DE, Chisholm D, Jané-Llopis E et al. From burden to "best buys": reducing  
41 the economic impact of non-communicable disease in low-and middle-income  
42 countries [Internet]. Geneva, CH: World Health Organization; World Economic  
43 Forum; 2011 [cited 2016 March 18]. 12p. Available from:  
44 [http://www.who.int/nmh/publications/best\\_buys\\_summary/en/](http://www.who.int/nmh/publications/best_buys_summary/en/)  
45  
46  
47  
48  
49  
50  
51  
52  
53  
54  
55  
56  
57  
58  
59  
60



## Figure legends

**Figure 1.** Selection of study participants, DUCS-HTN biomarker sub-study, 2014

**Figure 2.** Association between diet and serum total cholesterol. Values were adjusted for age, sex, socioeconomic status, food consumption frequency, total energy intake, major cooking oil used, physical activity and alcohol consumption.

**Figure 3.** Diagnosis, awareness and treatment of hypercholesterolemia in men (Part A; n=54 for all percentages) and women (Part B; n=110 for all percentages) in the DUCS-HTN biomarker sub-study, 2014.

For peer review only

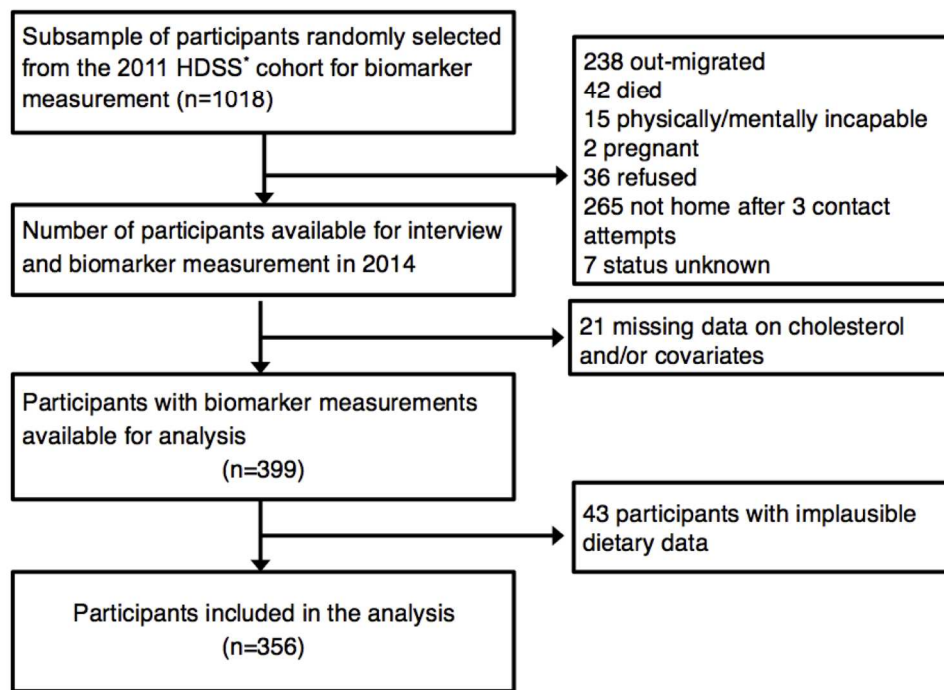

\*Dar es salaam Health and Demographic Surveillance System

170x135mm (300 x 300 DPI)

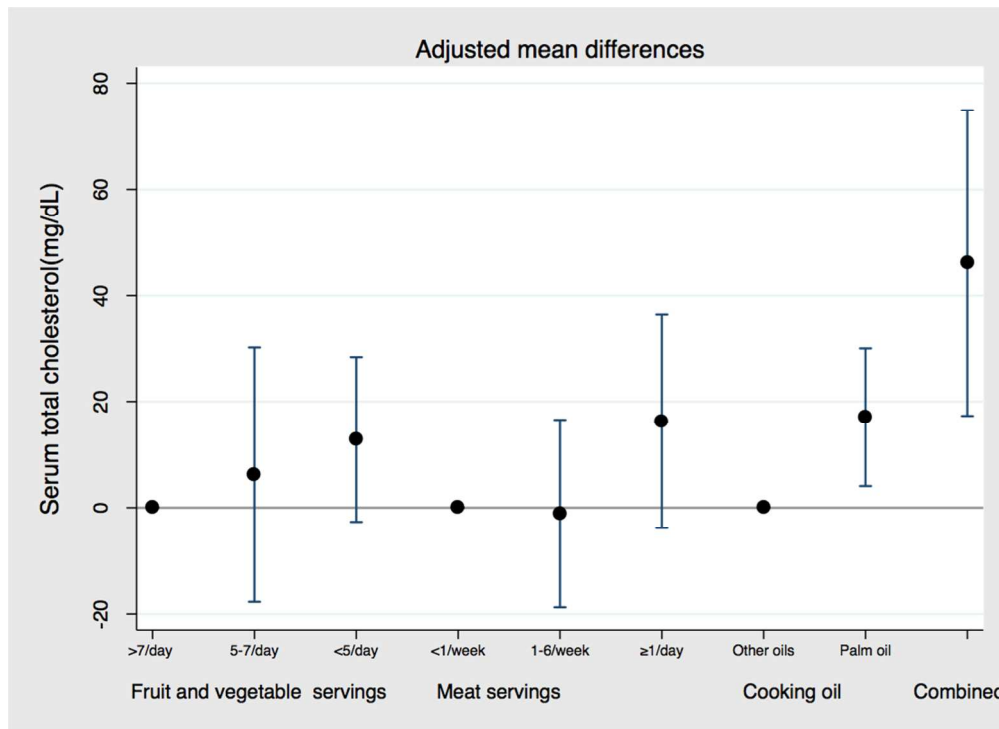

390x283mm (72 x 72 DPI)

Pre-view only

1  
2  
3  
4  
5  
6  
7  
8  
9  
10  
11  
12  
13  
14  
15  
16  
17  
18  
19  
20  
21  
22  
23  
24  
25  
26  
27  
28  
29  
30  
31  
32  
33  
34  
35  
36  
37  
38  
39  
40  
41  
42  
43  
44  
45  
46  
47  
48  
49  
50  
51  
52  
53  
54  
55  
56  
57  
58  
59  
60

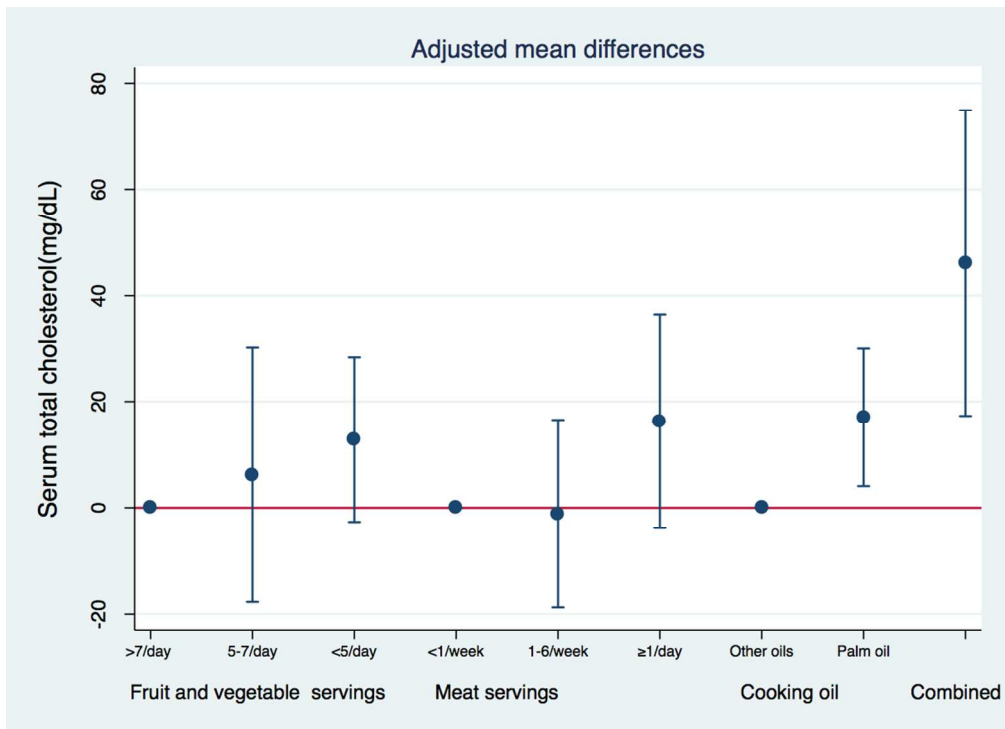

426x310mm (72 x 72 DPI)

Pre-view only

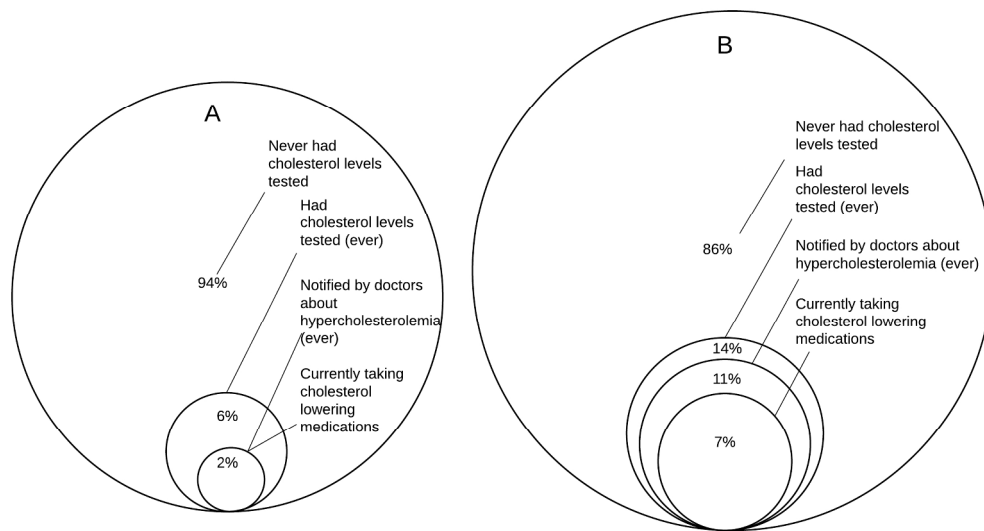

214x114mm (300 x 300 DPI)

review only

STROBE Statement—Checklist of items that should be included in reports of *cross-sectional studies*

|                              | Item No | Recommendation                                                                                                                                                                                                                                                                                                                                                                                                                                                      |
|------------------------------|---------|---------------------------------------------------------------------------------------------------------------------------------------------------------------------------------------------------------------------------------------------------------------------------------------------------------------------------------------------------------------------------------------------------------------------------------------------------------------------|
| <b>Title and abstract</b>    | 1       | (a) Indicate the study's design with a commonly used term in the title or the abstract <a href="#">[Within the title page 1 and method section of the abstract page 2]</a><br>(b) Provide in the abstract an informative and balanced summary of what was done and what was found <a href="#">[See results section of the abstract page 2]</a>                                                                                                                      |
| <b>Introduction</b>          |         |                                                                                                                                                                                                                                                                                                                                                                                                                                                                     |
| Background/rationale         | 2       | Explain the scientific background and rationale for the investigation being reported <a href="#">[page 4]</a>                                                                                                                                                                                                                                                                                                                                                       |
| Objectives                   | 3       | State specific objectives, including any prespecified hypotheses <a href="#">[page 4]</a>                                                                                                                                                                                                                                                                                                                                                                           |
| <b>Methods</b>               |         |                                                                                                                                                                                                                                                                                                                                                                                                                                                                     |
| Study design                 | 4       | Present key elements of study design early in the paper <a href="#">[page 5]</a>                                                                                                                                                                                                                                                                                                                                                                                    |
| Setting                      | 5       | Describe the setting, locations, and relevant dates, including periods of recruitment, exposure, follow-up, and data collection <a href="#">[page 5]</a>                                                                                                                                                                                                                                                                                                            |
| Participants                 | 6       | (a) Give the eligibility criteria, and the sources and methods of selection of participants <a href="#">[page 5]</a>                                                                                                                                                                                                                                                                                                                                                |
| Variables                    | 7       | Clearly define all outcomes, exposures, predictors, potential confounders, and effect modifiers. Give diagnostic criteria, if applicable <a href="#">[page 5-6]</a>                                                                                                                                                                                                                                                                                                 |
| Data sources/<br>measurement | 8*      | For each variable of interest, give sources of data and details of methods of assessment (measurement). Describe comparability of assessment methods if there is more than one group <a href="#">[page 5-6]</a>                                                                                                                                                                                                                                                     |
| Bias                         | 9       | Describe any efforts to address potential sources of bias <a href="#">[page 6]</a>                                                                                                                                                                                                                                                                                                                                                                                  |
| Study size                   | 10      | Explain how the study size was arrived at <a href="#">[page 5]</a>                                                                                                                                                                                                                                                                                                                                                                                                  |
| Quantitative variables       | 11      | Explain how quantitative variables were handled in the analyses. If applicable, describe which groupings were chosen and why <a href="#">[page 6]</a>                                                                                                                                                                                                                                                                                                               |
| Statistical methods          | 12      | (a) Describe all statistical methods, including those used to control for confounding <a href="#">[page 6-7]</a><br>(b) Describe any methods used to examine subgroups and interactions <a href="#">[page 7]</a><br>(c) Explain how missing data were addressed <a href="#">[page 6]</a><br>(d) If applicable, describe analytical methods taking account of sampling strategy <a href="#">[N/A]</a><br>(e) Describe any sensitivity analyses <a href="#">[N/A]</a> |
| <b>Results</b>               |         |                                                                                                                                                                                                                                                                                                                                                                                                                                                                     |
| Participants                 | 13*     | (a) Report numbers of individuals at each stage of study—eg numbers potentially eligible, examined for eligibility, confirmed eligible, included in the study, completing follow-up, and analysed <a href="#">[page 7 and Figure 1]</a><br>(b) Give reasons for non-participation at each stage <a href="#">[Figure 1]</a><br>(c) Consider use of a flow diagram <a href="#">[Figure 1]</a>                                                                         |
| Descriptive data             | 14*     | (a) Give characteristics of study participants (eg demographic, clinical, social) and information on exposures and potential confounders <a href="#">[page 7]</a><br>(b) Indicate number of participants with missing data for each variable of interest <a href="#">[Figure 1]</a>                                                                                                                                                                                 |
| Outcome data                 | 15*     | Report numbers of outcome events or summary measures <a href="#">[page 7-8 and Figure 3]</a>                                                                                                                                                                                                                                                                                                                                                                        |
| Main results                 | 16      | (a) Give unadjusted estimates and, if applicable, confounder-adjusted estimates and their precision (eg, 95% confidence interval). Make clear which confounders were adjusted for and why they were included <a href="#">[page 12 and Table 2]</a>                                                                                                                                                                                                                  |

(b) Report category boundaries when continuous variables were categorized [table 1]

(c) If relevant, consider translating estimates of relative risk into absolute risk for a meaningful time period [N/A]

|                          |    |                                                                                                                                                                                         |
|--------------------------|----|-----------------------------------------------------------------------------------------------------------------------------------------------------------------------------------------|
| Other analyses           | 17 | Report other analyses done—eg analyses of subgroups and interactions, and sensitivity analyses [N/A]                                                                                    |
| <b>Discussion</b>        |    |                                                                                                                                                                                         |
| Key results              | 18 | Summarise key results with reference to study objectives [page 14]                                                                                                                      |
| Limitations              | 19 | Discuss limitations of the study, taking into account sources of potential bias or imprecision. Discuss both direction and magnitude of any potential bias [page 16]                    |
| Interpretation           | 20 | Give a cautious overall interpretation of results considering objectives, limitations, multiplicity of analyses, results from similar studies, and other relevant evidence [page 14,16] |
| Generalisability         | 21 | Discuss the generalisability (external validity) of the study results [page 17]                                                                                                         |
| <b>Other information</b> |    |                                                                                                                                                                                         |
| Funding                  | 22 | Give the source of funding and the role of the funders for the present study and, if applicable, for the original study on which the present article is based [page 20]                 |

\*Give information separately for exposed and unexposed groups.

**Note:** An Explanation and Elaboration article discusses each checklist item and gives methodological background and published examples of transparent reporting. The STROBE checklist is best used in conjunction with this article (freely available on the Web sites of PLoS Medicine at <http://www.plosmedicine.org/>, Annals of Internal Medicine at <http://www.annals.org/>, and Epidemiology at <http://www.epidem.com/>). Information on the STROBE Initiative is available at [www.strobe-statement.org](http://www.strobe-statement.org).

# BMJ Open

## Dietary determinants of serum total cholesterol among middle-aged and older adults: a population-based cross-sectional study in Dar es Salaam, Tanzania

|                                 |                                                                                                                                                                                                                                                                                                                                                                                                                                                                                                                                                                                                                                                                                                                                                                                                                                                                                                                                                                                                          |
|---------------------------------|----------------------------------------------------------------------------------------------------------------------------------------------------------------------------------------------------------------------------------------------------------------------------------------------------------------------------------------------------------------------------------------------------------------------------------------------------------------------------------------------------------------------------------------------------------------------------------------------------------------------------------------------------------------------------------------------------------------------------------------------------------------------------------------------------------------------------------------------------------------------------------------------------------------------------------------------------------------------------------------------------------|
| Journal:                        | <i>BMJ Open</i>                                                                                                                                                                                                                                                                                                                                                                                                                                                                                                                                                                                                                                                                                                                                                                                                                                                                                                                                                                                          |
| Manuscript ID                   | bmjopen-2016-015028.R1                                                                                                                                                                                                                                                                                                                                                                                                                                                                                                                                                                                                                                                                                                                                                                                                                                                                                                                                                                                   |
| Article Type:                   | Research                                                                                                                                                                                                                                                                                                                                                                                                                                                                                                                                                                                                                                                                                                                                                                                                                                                                                                                                                                                                 |
| Date Submitted by the Author:   | 24-Jan-2017                                                                                                                                                                                                                                                                                                                                                                                                                                                                                                                                                                                                                                                                                                                                                                                                                                                                                                                                                                                              |
| Complete List of Authors:       | Kakarmath, Sujay; Harvard T.H. Chan School of Public Health, Global Health and Population<br>Zack, Rachel; Harvard T.H. Chan School of Public Health, Epidemiology<br>Leyna, Germana; Muhimbili University of Health and Allied Sciences, Epidemiology & Biostatistics, School of Public Health<br>Fahimi, Saman; Harvard T.H. Chan School of Public Health, Global Health and Population<br>Liu, Enju; Harvard T.H. Chan School of Public Health, Global Health and Population<br>Fawzi, Wafaie; Harvard T.H. Chan School of Public Health, Global Health and Population, Epidemiology, Nutrition<br>Lukmanji, Zohra; World Food Program; Tumaini Hospital<br>Killewo, Japhet; Muhimbili University of Health and Allied Sciences, Epidemiology & Biostatistics, School of Public Health<br>Sacks, Frank; Harvard T.H. Chan School of Public Health, Nutrition, Genetics and Complex Diseases<br>Danaei, Goodarz; Harvard T.H. Chan School of Public Health, Global Health and Population, Epidemiology |
| <b>Primary Subject Heading</b>: | Nutrition and metabolism                                                                                                                                                                                                                                                                                                                                                                                                                                                                                                                                                                                                                                                                                                                                                                                                                                                                                                                                                                                 |
| Secondary Subject Heading:      | Epidemiology, Public health, Global health, Cardiovascular medicine                                                                                                                                                                                                                                                                                                                                                                                                                                                                                                                                                                                                                                                                                                                                                                                                                                                                                                                                      |
| Keywords:                       | cholesterol, palm oil, diet, Nutrition < TROPICAL MEDICINE, Tanzania, sub-Saharan Africa                                                                                                                                                                                                                                                                                                                                                                                                                                                                                                                                                                                                                                                                                                                                                                                                                                                                                                                 |
|                                 |                                                                                                                                                                                                                                                                                                                                                                                                                                                                                                                                                                                                                                                                                                                                                                                                                                                                                                                                                                                                          |

SCHOLARONE™  
Manuscripts



1  
2  
3  
4 1 **Dietary determinants of serum total cholesterol among middle-aged and older adults:**  
5  
6 2 **a population-based cross-sectional study in Dar es Salaam, Tanzania**  
7  
8 3

9  
10 4 **Authors:** Sujay Kakarmath MBBS Master's student<sup>a</sup>, Rachel M Zack MSc Doctoral  
11 student<sup>b</sup>, Germana H Leyna MD PhD Lecturer<sup>c</sup>, Saman Fahimi MD PhD Postdoctoral  
12 Research Fellow<sup>a</sup>, Enju Liu MD PhD Research Scientist<sup>a</sup>, Wafaie W Fawzi DrPH MBBS  
13 MPH MS Professor<sup>a,b,d</sup>, Zohra Lukmanji MSc Nutrition Consultant<sup>e</sup>, Japhet Killewo  
14 MBCHB DPH MSc PhD Professor<sup>c</sup>, Frank Sacks ScD MD Professor<sup>d</sup>, Goodarz Danaei ScD  
15 MD MS Assistant Professor<sup>a,b</sup>  
16  
17  
18

19  
20 10 <sup>a</sup> Department of Global Health and Population, Harvard T.H. Chan School of Public  
21 Health, Boston, Massachusetts, USA

22  
23 12 <sup>b</sup> Department of Epidemiology, Harvard T.H. Chan School of Public Health, Boston,  
24 Massachusetts, USA

25  
26 14 <sup>c</sup> Department of Epidemiology and Biostatistics, School of Public Health, Muhimbili  
27 University of Health and Allied Sciences, Dar es Salaam, United Republic of Tanzania.

28  
29 16 <sup>d</sup> Department of Nutrition, Harvard T.H. Chan School of Public Health, Boston,  
30 Massachusetts, USA

31  
32 18 <sup>e</sup> World food program, Dar es Salaam and Tumaini Hospital, Dar es Salaam, Tanzania  
33  
34  
35  
36

37 20 **Correspondence to:** Goodarz Danaei

38  
39 21 677 Huntington Avenue, 1107, Boston MA 02115

40  
41 22 [gdanaei@hsph.harvard.edu](mailto:gdanaei@hsph.harvard.edu)

42  
43 23 Telephone Number:+1 617 432 5722

44  
45 24 **Word count:** 3397  
46  
47  
48  
49  
50  
51  
52  
53  
54  
55  
56  
57  
58  
59  
60

## 1 ABSTRACT

2  
3 **Objective:** To assess the dietary determinants of serum total cholesterol.

4 **Design:** Cross-sectional population-based study.

5 **Setting:** Peri-urban region of Dar es Salaam, Tanzania.

6 **Participants:** 347 adults aged 40 years and older from the Dar es Salaam Urban Cohort  
7 Hypertension Study (DUCS-HTN).

8 **Main outcome measure:** Serum total cholesterol measured using a point-of-care device.

9 **Results:** Mean serum total cholesterol level was 204 mg/dL (Interquartile range (IQR)  
10 169 to 236 mg/dL) in women and 185 mg/dL (IQR 152 to 216 mg/dL) in men. After  
11 adjusting for demographic, socioeconomic, lifestyle and dietary factors, participants  
12 who reported using palm oil as the major cooking oil had serum total cholesterol higher  
13 by 15 mg/dL (95% confidence interval 1 to 29 mg/dL) compared with those who  
14 reported using sunflower oil. Consumption of one or more servings of meat per day (P  
15 for trend= 0.017) and less than five servings of fruits and vegetables per day (P for  
16 trend= 0.024) were also associated with higher serum total cholesterol. A combination  
17 of using palm oil for cooking, eating more than one serving of meat per day and fewer  
18 than five servings of fruits and vegetables per day was associated with 46 mg/dL (95%  
19 confidence interval 16 to 76 mg/dL) higher serum total cholesterol.

20 **Conclusions:** Using palm oil for cooking was associated with higher serum total  
21 cholesterol levels in this peri-urban population in Dar es Salaam. Reduction of saturated  
22 fat content of edible oil may be considered as a population-based strategy for primary  
23 prevention of cardiovascular diseases.

24 **Key words:** cholesterol, palm oil, diet, nutrition, Tanzania, Sub-Saharan Africa

## 25 26 27 28 29 **STRENGTHS AND LIMITATIONS OF THIS STUDY**

- 1
- 2
- 3
- 4
- 5
- 6
- 7
- 8
- 9
- 10
- 11
- 12
- 13
- 14
- 15
- 16
- 17
- 18
- 19
- 20
- 21
- 22
- 23
- 24
- 25
- 26
- 27
- 28
- 29
- 30
- 31
- 32
- 33
- 34
- 35
- 36
- 37
- 38
- 39
- 40
- 41
- 42
- 43
- 44
- 45
- 46
- 47
- 48
- 49
- 50
- 51
- 52
- 53
- 54
- 55
- 56
- 57
- 58
- 59
- 60
- 1 • This is the first population-based study to report an association between using palm
  - 2 oil for cooking and serum total cholesterol in East Africa.
  - 3 • A reliable point-of care lipid testing system was used to measure serum total
  - 4 cholesterol that has good clinical agreement with laboratory reference methods.
  - 5 • Potential confounders of the association between diet and serum total cholesterol
  - 6 were systematically measured and adjusted for.
  - 7 • Only serum total cholesterol was measured instead of a full lipid panel, due to logistic
  - 8 and financial limitations.
  - 9 • The relatively small sample size may have resulted in insufficient statistical power to
  - 10 detect some associations.
  - 11 • The assessment of diet using any method is prone to measurement error, which may
  - 12 have resulted in bias, although differential misreporting of cooking oil by cholesterol
  - 13 level is unlikely.

## 1 INTRODUCTION

2  
3  
4  
5  
6  
7 Sub-Saharan Africa is facing a burgeoning epidemic of non-communicable diseases  
8 (NCDs) due to changing demographic profiles, epidemiologic transition, urbanization,  
9 and lifestyle changes as a result of economic development as well as increasing survival  
10 of HIV patients.[1, 2] In 2015, one third of all estimated NCD deaths in sub-Saharan  
11 Africa were due to cardiovascular diseases (CVD).[3] By 2030, the share of all deaths  
12 attributable to CVD is projected to increase by nearly 40% in this region.[3]

13  
14  
15  
16  
17  
18  
19  
20  
21  
22  
23  
24  
25  
26  
27  
28  
29  
30  
31  
32  
33  
34  
35  
36  
37  
38  
39  
40  
41  
42  
43  
44  
45  
46  
47  
48  
49  
50  
51  
52  
53  
54  
55  
56  
57  
58  
59  
60  
9 Dyslipidaemia is a well-known risk factor for ischemic heart disease (IHD), stroke, and  
10 other vascular diseases.[4, 5] In middle-aged adults, IHD mortality is lower by as much  
11 as 30 to 50% for every 1 mmol/L (38.6mg/dL) lower serum total cholesterol.[5] Sub-  
12 Saharan Africans have historically had a favorable lipid profile [6] but hyperlipidaemia is  
13 becoming increasingly common in these countries, especially in urban areas.[7-9] It is  
14 estimated that thirty-four percent of ischemic heart disease deaths in Tanzania are  
15 attributable to dyslipidaemia.[10]

16 A few studies have already explored the relationship between diet and serum total  
17 cholesterol in eastern sub-Saharan Africa and reported an association between higher  
18 intake of meat and lower intake of fish and green vegetables with higher serum total  
19 cholesterol. [11-15] However, two of these studies compared rural and coastal Bantu  
20 populations that are known to have, respectively, vegetarian and fish-based diets and  
21 did not measure diet in each participant and based their conclusions on known dietary  
22 differences between ethnic populations. [14, 15] Another study included participants  
23 from rural, urban and pastoral regions of Tanzania but did not report the magnitude of  
24 the association[12] The other two studies conducted in urban Tanzania did not adjust  
25 for potential confounders of the relationship between diet and serum total  
26 cholesterol.[11, 13] There are a few studies from other parts of sub-Saharan Africa that  
27 have looked at the association between diet and serum cholesterol. A study conducted  
28 in a rural population in Uganda found that eating fewer than 5 servings of fruits and

1  
2  
3 1 vegetables daily was associated with higher odds of low HDL cholesterol among men,  
4 2 but lower odds among women.[16] Another study in urban Uganda found lower mean  
5 3 serum total cholesterol in lacto-ovo-vegetarians compared to non-vegetarians.[17]  
6 4  
7 5 Another potential dietary determinant of serum cholesterol is the type of oil used in  
8 6 cooking.[18,19] Using cooking oils with higher saturated fat content such as coconut  
9 7 and palm oil has been associated with higher serum total cholesterol levels in clinical  
10 8 trials and observational studies.[20, 21] Population-level differences in CVD morbidity  
11 9 and mortality is associated with differences in type of cooking oil in eastern  
12 10 European,[22] Costa Rica,[23] and Singapore.[24] Mauritius, Seychelles and Singapore  
13 11 have already implemented policy schemes to reduce saturated fat content of cooking oil  
14 12 as population-level interventions to reduce burden of CVD.[25-27]  
15 13 A thorough understanding of the role of dietary determinants of serum cholesterol will  
16 14 be invaluable in designing population-level interventions to address the growing CVD  
17 15 burden especially considering that treatment for dyslipidaemia is either unavailable or  
18 16 prohibitively expensive for most patients in low-income countries.[28] Tanzanian diet  
19 17 consists predominantly of carbohydrates (mainly maize, sweet potatoes, cassava and  
20 18 rice) consumed with green leafy vegetables, beans or peas and occasionally with meat  
21 19 or fish.[29] Palm oil is the major cooking oil, followed by sunflower oil.

22 20 We conducted a cross-sectional population-based study to assess the association of  
23 21 type of cooking oil (palm vs sunflower oil) and diet (meat, fish, fruit and vegetable  
24 22 consumption) with serum total cholesterol in an adult population in a peri-urban area of  
25 23 Dar es Salaam. We hypothesized that use of palm oil for cooking and higher intake of  
26 24 meat and lower intake of fruits and vegetables will be associated with higher serum  
27 25 total cholesterol.

## 28 26 **METHODS**

### 29 27 **Study design and population**

1 The Dar es Salaam Health and Demographic Surveillance System (HDSS) is a  
2 demographic surveillance system in Ukonga and Gongo la Mboto wards of Dar es  
3 Salaam, Tanzania with over 100,000 enumerated individuals living in 21,000 households  
4 followed since 2011/12. For the Dar es Salaam Urban Cohort Hypertension Study (DUCS-  
5 HTN), we randomly selected one large and one small neighborhood in the HDSS and  
6 contacted all adult residents aged 40 years and older, who had been registered in the  
7 HDSS database in 2011 or 2012. A random subsample of one-fifth of the eligible  
8 participants was selected for additional assessment of diet and measurement of serum  
9 total cholesterol. The size of this subsample was determined largely based upon the  
10 availability of resources. Pregnant women and those who were physically and mentally  
11 incapable of completing the interview and measurements were excluded. The  
12 participant selection flowchart is shown in Figure 1. Face-to-face interviews and  
13 measurements were conducted in participant's home from March to June 2014 by six  
14 trained interviewers. All interviewers had previous experience conducting public health  
15 surveys. For this study, interviewers received five days of training and two days of field  
16 practice in a nearby neighborhood. At least three attempts were made to contact all  
17 potential participants. Written informed consent was obtained from all participants.  
18 The study protocol was approved by the Institutional Review Board of the Harvard TH  
19 Chan School of Public Health and the Research and Publications Committee of  
20 Muhimbili University of Health and Allied Sciences.

## 21 **Measurements**

22 Non-fasting serum total cholesterol was measured from 30 micro-liters of finger-prick  
23 capillary blood samples using Cardiochek PA devices (Polymer Technology Systems Inc,  
24 IN, USA).[30, 31] The coefficient of variation for this device has been determined to be  
25 in the range of 1.3 to 2.9%.[30]

26 Data on diet was collected using a semi-quantitative food frequency questionnaire  
27 (FFQ). The FFQ assessed intake of 179 food and drink items over the past 30 days. A  
28 shorter 85-item version of this instrument has been previously used in Tanzania.[32]

1 Nutrient intakes were calculated by multiplying the frequency of food consumption  
2 measured from FFQ by the nutrient content of the specified portion size using the  
3 Tanzanian food composition table.[33] Meat intake was defined to include all red and  
4 white meat consumption, excluding fish consumption. Fruit and vegetable intake was  
5 defined to include consumption of all fruits and vegetables, except for root vegetables  
6 and fruit juice. An additional question was asked to assess the main type of cooking oil:  
7 “What is the kind of oil used most often in your home for frying food?”. Frying is the  
8 most common cooking technique involving oil use in this region. The reference to a  
9 cooking technique was made to distinguish it from other oils that may be used in a  
10 household, such as fuels.

11 All participants completed a socioeconomic, demographic and lifestyle questionnaire  
12 and had their height, weight, waist circumference, hip circumference, and blood  
13 pressure measured by trained interviewers. Some demographic information (age, sex,  
14 neighborhood, components of wealth index) was taken from the HDSS baseline  
15 interview. Body mass index was calculated as weight (kg) divided by height (m) squared,  
16 and categorized as underweight (<18.5), normal (18.5 to <25.0), overweight (25.0 to  
17 <30.0), and obese ( $\geq 30.0$ ).[34] Physical activity was assessed using the Global Physical  
18 Activity Questionnaire in the domains of work, transportation, and leisure,[35] and  
19 categorized into tertiles of Metabolic Equivalent (MET) hours per week. To measure  
20 socioeconomic status, we created a household wealth index using a principal  
21 component analysis of household characteristics (floor material, roof material, wall  
22 material, electricity), household assets (television, radio, shop, sewing machine, sofa,  
23 fan, iron, stove with oven, stove without oven, dining table, cupboard, watch, mobile  
24 phone, bike, motorcycle, cart, car, motorboat), and animal ownership (goats, sheep,  
25 chicken/ducks, pigs).[36] The household wealth index was categorized into tertiles.

## 26 **Statistical analysis**

27 We excluded participants with implausible dietary data (total energy intake <500 or  
28 >5000 kcal/day), and with missing data on serum total cholesterol, diet and/or any of  
29 the potential covariates.

1 Chi-square tests were used to assess binary variables, F-tests were used for categorical  
2 variables and tests of linear trend based on median value within each category for  
3 ordinal variables with a linear association with serum total cholesterol (i.e. age, wealth  
4 index, and food consumption categories). Mean differences and 95% confidence  
5 intervals in serum total cholesterol across categories of dietary factors, including  
6 cooking oil were estimated using multivariable linear regression. Potential confounders  
7 were included in the model based on a-priori knowledge of lifestyle and socio-  
8 demographic determinants of diet and serum total cholesterol. The fully adjusted model  
9 included age, sex, total energy intake, physical activity, alcohol consumption, wealth  
10 index and employment status as covariates. We also adjusted for interviewer to remove  
11 the effect of any extraneous variation in measurement of subjective risk factors across  
12 interviewers. [37, 38] We examined interactions of potential determinants of serum  
13 total cholesterol with sex, but no interactions were statistically significant at 0.2 level,  
14 therefore we did not include these product terms in the final model. We conducted  
15 sensitivity analyses by excluding 16 participants who reported either being previously  
16 diagnosed with hypercholesterolaemia, or currently taking cholesterol-lowering  
17 medications or being advised by a health professional to modify diet to lower  
18 cholesterol.

19 All analyses were performed using STATA software version 13.1 (STATA Corporation,  
20 College Station, Texas).

## 21 22 **RESULTS**

23 A total of 420 participants were enrolled for the random subsample with diet and  
24 cholesterol measurements. Among these, data on serum total cholesterol and selected  
25 covariates was available for 399 participants. We excluded 43 participants due to  
26 implausible caloric intake. In addition, after descriptive analyses we excluded 9 (2%)  
27 participants who reported using cooking oils other than palm or sunflower oil. The final  
28 analytic sample included 347 participants (FIGURE 1).

29 Forty-two percent of the participants (n=347) were men (TABLE 1). Mean age of men



1 was 55 years (SD 11), and that of women was 52 (SD 10). 44% of the women (n=202)  
2 and 19% of men (n=145) were obese, and one third of men and women were  
3 overweight. Mean energy intake per day was 2413 kcal. Thirty-seven percent of men  
4 and 54% of women were hypercholesterolemic (i.e. had total cholesterol  $\geq$ 200 mg/dL).  
5 Mean serum total cholesterol in women was 204 mg/dL (95% confidence interval 197 to  
6 211 mg/dL) and was significantly higher than that of men at 185 mg/dL (177 to 193  
7 mg/dL). Serum total cholesterol levels were higher in older age groups.  
8 79% of participants reported using palm oil as the major cooking oil and the rest  
9 reported using sunflower oil (TABLE 1). Those who reported using palm oil were most  
10 likely to be in the poorest tertile of wealth, whereas those who reported using  
11 sunflower oil were most likely to be in the wealthiest tertile ( $p<0.001$ ). Those who  
12 reported using sunflower oil had a higher energy intake ( $p=0.04$ ), and reported  
13 consuming meat ( $p=0.004$ ) and dairy ( $p=0.02$ ) more frequently than those who reported  
14 using palm oil. Mean serum total cholesterol in those who reported using palm oil was  
15 199 mg/dL (193 to 205) and was significantly higher than those who reported using  
16 sunflower oil 184 mg/dL (173 to 195).

1 **Table 1.** Participants' characteristics in DUCS-HTN biomarker sub-study, 2014

| Variable                               | All (n=347) | Men (n=145) | Women (n=202) | Use palm oil (n=274) | Use sunflower oil (n=73) |
|----------------------------------------|-------------|-------------|---------------|----------------------|--------------------------|
| <b>Age</b>                             |             |             |               |                      |                          |
| 40-49                                  | 150 (43)    | 56 (39)     | 94 (47)       | 123 (45)             | 27 (37)                  |
| 50-59                                  | 113 (33)    | 43 (30)     | 70 (35)       | 82 (30)              | 31 (42)                  |
| 60 and above                           | 84 (24)     | 46 (32)     | 38 (19)       | 69 (25)              | 15 (21)                  |
| <b>Employment status</b>               |             |             |               |                      |                          |
| Unemployed                             | 83 (24)     | 14 (10)     | 69 (34)       | 70 (26)              | 13 (18)                  |
| Employed (includes self-employed)      | 238 (69)    | 112 (77)    | 126 (62)      | 183 (67)             | 55 (75)                  |
| Retired                                | 26 (7)      | 19 (13)     | 7 (3)         | 21 (8)               | 5 (7)                    |
| <b>Household wealth index</b>          |             |             |               |                      |                          |
| Tertile 1, Poorest                     | 115 (33)    | 49 (34)     | 66 (33)       | 109 (40)             | 6 (8)                    |
| Tertile 2                              | 117 (34)    | 53 (37)     | 64 (32)       | 90 (33)              | 27 (37)                  |
| Tertile 3, Wealthiest                  | 115 (33)    | 43 (30)     | 72 (36)       | 75 (27)              | 40 (55)                  |
| <b>BMI (kg/m<sup>2</sup>)</b>          |             |             |               |                      |                          |
| Underweight (<18.50)                   | 19 (5)      | 13 (9)      | 6 (3)         | 19 (7)               | 0 (0)                    |
| Normal weight (18.50-<25.00)           | 100 (29)    | 56 (39)     | 44 (22)       | 91 (33)              | 9 (12)                   |
| Overweight (25-<30.00)                 | 112 (32)    | 48 (33)     | 64 (32)       | 81 (30)              | 31 (42)                  |
| Obese (≥ 30.00)                        | 116 (33)    | 28 (19)     | 88 (44)       | 83 (30)              | 33 (45)                  |
| <b>Physical activity</b>               |             |             |               |                      |                          |
| Tertile 1,<br>(0-14 MET-hours/week)    | 123 (35)    | 46 (32)     | 77 (38)       | 96 (35)              | 27 (37)                  |
| Tertile 2,<br>(15-112 MET-hours/week)  | 108 (31)    | 38 (27)     | 70 (35)       | 86 (31)              | 22 (30)                  |
| Tertile 3,<br>(113-840 MET-hours/week) | 116 (33)    | 61 (42)     | 55 (27)       | 92 (34)              | 24 (33)                  |

| Variable                             | All (n=347) | Men (n=145) | Women (n=202) | Use palm oil (n=274) | Use sunflower oil (n=73) |
|--------------------------------------|-------------|-------------|---------------|----------------------|--------------------------|
| <b>Alcohol drinking<sup>a</sup></b>  |             |             |               |                      |                          |
| Non-drinker                          | 286 (82)    | 103 (71)    | 183 (91)      | 225 (82)             | 61 (84)                  |
| <b>Smoking</b>                       |             |             |               |                      |                          |
| Non-smoker                           | 278 (81)    | 85 (59)     | 193 (97)      | 210 (78)             | 68 (93)                  |
| Former smoker                        | 43 (13)     | 39 (27)     | 4 (2)         | 38 (14)              | 5 (7)                    |
| Current smoker                       | 22 (6)      | 19 (13)     | 3 (2)         | 22 (8)               | 0 (0)                    |
| <b>DIETARY VARIABLES</b>             |             |             |               |                      |                          |
| <b>Palm oil as major cooking oil</b> | 274 (79)    | 119 (82)    | 155 (77)      |                      |                          |
| <b>Meat intake</b>                   |             |             |               |                      |                          |
| <1 serving/week                      | 41 (12)     | 21 (14)     | 20 (10)       | 36 (13)              | 5 (7)                    |
| 1-6 servings/week                    | 173 (50)    | 55 (38)     | 118 (58)      | 145 (53)             | 28 (38)                  |
| ≥1 servings/day                      | 133 (38)    | 69 (48)     | 64 (32)       | 93 (34)              | 40 (55)                  |
| <b>Fish intake</b>                   |             |             |               |                      |                          |
| < 1 serving/week                     | 41 (12)     | 13 (9)      | 28 (14)       | 31 (11)              | 10 (14)                  |
| 1-7 servings/week                    | 196 (56)    | 76 (52)     | 120 (59)      | 154 (56)             | 42 (58)                  |
| > 1 servings/day                     | 110 (32)    | 56 (39)     | 54 (27)       | 89 (32)              | 21 (29)                  |
| <b>Dairy intake</b>                  |             |             |               |                      |                          |
| < 1 serving/week                     | 159 (46)    | 63 (43)     | 96 (48)       | 136 (50)             | 23 (32)                  |
| 1-6 servings/week                    | 133 (38)    | 65 (45)     | 68 (34)       | 99 (36)              | 34 (47)                  |
| ≥ 1 servings/day                     | 55 (16)     | 17 (12)     | 38 (19)       | 39 (14)              | 16 (22)                  |
| <b>Fruit and vegetable</b>           |             |             |               |                      |                          |
| < 5 servings/day                     | 121 (35)    | 49 (34)     | 72 (36)       | 101 (37)             | 20 (27)                  |
| 5-7 servings/day                     | 68 (20)     | 26 (20)     | 42 (21)       | 54 (20)              | 14 (19)                  |

| Variable                                          | All (n=347)          | Men (n=145)          | Women (n=202)        | Use palm oil (n=274) | Use sunflower oil (n=73) |
|---------------------------------------------------|----------------------|----------------------|----------------------|----------------------|--------------------------|
| >7 servings/day                                   | 158 (46)             | 70 (48)              | 88 (44)              | 119 (43)             | 39 (53)                  |
| <b>Nuts and legumes</b>                           |                      |                      |                      |                      |                          |
| < 1 serving/week                                  | 27 (8)               | 7 (5)                | 20 (10)              | 17 (6)               | 10 (14)                  |
| 1-7 servings/week                                 | 200 (58)             | 87 (60)              | 113 (56)             | 162 (59)             | 38 (52)                  |
| > 1 servings/day                                  | 120 (35)             | 51 (35)              | 69 (34)              | 95 (35)              | 25 (34)                  |
| <b>Total energy intake (kcal/day)<sup>b</sup></b> | 2413<br>(1701, 3215) | 2629<br>(1780, 3216) | 2313<br>(1617, 3207) | 2369<br>(1654, 3150) | 2743<br>(1865, 3606)     |
| <b>Fat intake<sup>b</sup></b>                     |                      |                      |                      |                      |                          |
| Total fat (% of energy)                           | 17 (15, 20)          | 17 (15, 21)          | 17 (15, 20)          | 17 (14, 20)          | 20 (15, 22)              |
| Saturated fat (% energy)                          | 10 (8, 13)           | 10 (8, 13)           | 10 (8, 12)           | 10 (8, 13)           | 10 (8, 11)               |
| Monounsaturated fat (% of energy)                 | 4 (3, 5)             | 4 (3, 5)             | 4 (3, 5)             | 4 (3, 5)             | 4 (4, 5)                 |
| Polyunsaturated fat (% of energy)                 | 2 (1, 2)             | 2 (1, 2))            | 2 (1, 2)             | 1 (1, 2)             | 2 (1, 2)                 |
| <b>Cholesterol</b>                                |                      |                      |                      |                      |                          |
| Serum total cholesterol (mg/dl) <sup>c</sup>      | 196 (3)              | 185 (4)              | 204 (4)              | 199 (3)              | 184 (6)                  |
| Hypercholesterolaemia <sup>d</sup>                | 164 (47)             | 54 (37)              | 110 (54)             | 135 (49)             | 29 (40)                  |
| Cholesterol level was previously checked          | 29 (18)              | 7 (13)               | 22 (20)              | 13 (10)              | 16 (55)                  |
| Previously diagnosed hypercholesterolaemia        | 13 (8)               | 1 (2)                | 12 (11)              | 5 (4)                | 8 (28)                   |
| Currently taking cholesterol lowering medications | 9 (5)                | 1 (2)                | 8 (7)                | 3 (2)                | 6 (21)                   |

1  
2  
3  
4  
5  
6  
7  
8  
9  
10  
11  
12  
13  
14  
15  
16  
17  
18  
19  
20  
21  
22  
23  
24  
25  
26  
27  
28  
29  
30  
31  
32  
33  
34  
35  
36  
37  
38  
39  
40  
41  
42  
43  
44  
45  
46  
47  
48  
49

1  
2  
3  
4

Number (%) reported for all variables, except as specified b and c below

<sup>a</sup> According to report of drinking alcohol in the past 30 days

<sup>b</sup> Total energy and fat intake, which is reported as median (interquartile range)

1  
2  
3  
4  
5  
6  
7  
8  
9  
10  
11  
12  
13  
14  
15  
16  
17  
18  
19  
20  
21  
22  
23  
24  
25  
26  
27  
28  
29  
30  
31  
32  
33  
34  
35  
36  
37  
38  
39  
40  
41  
42  
43  
44  
45  
46  
47  
48  
49

- 1 <sup>c</sup> Serum total cholesterol, reported as mean (standard error)
- 2 <sup>d</sup> Hypercholesterolaemia defined as total cholesterol  $\geq$  200 mg/dL

For peer review only

1 In the minimally adjusted model (with interviewer as the only covariate), those who  
2 reported using palm oil as the major cooking oil had serum total cholesterol levels  
3 higher by 11 mg/dL (-2 to 24 mg/dL) compared with those who reported using  
4 sunflower oil (TABLE 2). After adjusting for covariates, participants who used palm oil for  
5 cooking had 15 mg/dL (1 to 29 mg/dL) higher serum total cholesterol (FIGURE 2). The  
6 negative confounding was mostly due to the negative correlation between female  
7 gender and meat intake with palm oil use (both variables were positively correlated with  
8 serum total cholesterol). Serum total cholesterol was also higher in participants who ate  
9 meat more frequently (P for trend 0.017) after adjusting for potential confounders.  
10 Specifically, those who ate more than one serving of meat per day had 18 mg/dL (-3 to  
11 39 mg/dL) higher serum total cholesterol compared with those who ate less than one  
12 serving per week. In this relationship, higher total energy intake was the major  
13 confounder with a positive correlation with meat intake but negative correlation with  
14 serum total cholesterol. Consumption of more than seven servings of fruits and  
15 vegetables per day was associated with 13 mg/dL (-29 to 3 mg/dL) lower serum total  
16 cholesterol, compared to consumption of fewer than five servings per day (P for trend  
17 0.024). A combination of using palm oil for cooking, eating more than one serving of  
18 meat per day and fewer than five servings of fruits and vegetables per day was  
19 associated with 46 mg/dL (16 to 76 mg/dL) higher serum total cholesterol.

20  
21 We found similar associations after excluding 16 participants who reported either being  
22 previously diagnosed with hypercholesterolaemia, or currently taking cholesterol  
23 lowering medications or being advised by a health professional to modify diet to lower  
24 cholesterol. Those who used palm oil had 17 mg/dL (2 to 32 mg/dL) higher serum total  
25 cholesterol compared with those who used sunflower oil (TABLE 2).

26  
27  
28

1  
2  
3  
4  
5 **Table 2.** Adjusted mean differences for serum total cholesterol (mg/dL) by dietary factors; DUCS-HTN biomarker sub-study  
6  
7

| Variable                          | Interviewer-adjusted mean difference (95% CI) | P Value <sup>a</sup> | Fully-adjusted <sup>b</sup> mean difference (95% CI) (n=347) | P Value <sup>a</sup> | Fully-adjusted <sup>c</sup> mean difference after excluding 16 participants diagnosed or treated for dyslipidaemia (95% CI) (n=331) | P Value <sup>a</sup> |
|-----------------------------------|-----------------------------------------------|----------------------|--------------------------------------------------------------|----------------------|-------------------------------------------------------------------------------------------------------------------------------------|----------------------|
| <b>Major cooking oil</b>          |                                               | 0.092                |                                                              | 0.033                |                                                                                                                                     | 0.028                |
| Sunflower oil                     | Reference                                     |                      | Reference                                                    |                      | Reference                                                                                                                           |                      |
| Palm oil                          | 11 (-2, 24)                                   |                      | 15 (1, 29)                                                   |                      | 17 (2, 32)                                                                                                                          |                      |
| <b>Meat intake</b>                |                                               | 0.485                |                                                              | 0.017                |                                                                                                                                     | 0.031                |
| <1 serving/week                   | Reference                                     |                      | Reference                                                    |                      | Reference                                                                                                                           |                      |
| 1-6 servings/week                 | -1 (-19, 16)                                  |                      | -1 (-19, 17)                                                 |                      | -2 (-20, 17)                                                                                                                        |                      |
| ≥1 servings/day                   | 4 (-15, 22)                                   |                      | 18 (-3, 39)                                                  |                      | 16 (-5, 37)                                                                                                                         |                      |
| <b>Fruit and vegetable intake</b> |                                               | 0.028                |                                                              | 0.011                |                                                                                                                                     | 0.024                |
| < 5 servings/day                  | 16 (2,30)                                     |                      | 13 (-3, 29)                                                  |                      | 12 (-5, 29)                                                                                                                         |                      |
| 5-7 servings/day                  | 10 (-6, 25)                                   |                      | 8 (-8, 24)                                                   |                      | 10 (-7, 26)                                                                                                                         |                      |
| > 7 servings/day                  | Reference                                     |                      | Reference                                                    |                      | Reference                                                                                                                           |                      |
| <b>Fish intake</b>                |                                               | 0.399                |                                                              | 0.446                |                                                                                                                                     | 0.309                |
| < 1 serving/week                  | 14 (-8, 36)                                   |                      | 10 (-13, 33)                                                 |                      | 14 (-9, 38)                                                                                                                         |                      |
| 1-7 servings/week                 | 3 (-11, 17)                                   |                      | 2 (-13, 17)                                                  |                      | 4 (-11, 20)                                                                                                                         |                      |
| >1 servings/day                   | Reference                                     |                      | Reference                                                    |                      | Reference                                                                                                                           |                      |
| <b>Dairy intake</b>               |                                               | 0.802                |                                                              | 0.572                |                                                                                                                                     | 0.690                |
| < 1 serving/week                  | Reference                                     |                      | Reference                                                    |                      | Reference                                                                                                                           |                      |
| 1-6 servings/week                 | -9 (-22, 4)                                   |                      | -7 (-21, 6)                                                  |                      | -7 (-21, 7)                                                                                                                         |                      |

| Variable                                      | Interviewer-adjusted mean difference (95% CI) | P Value <sup>a</sup> | Fully-adjusted <sup>b</sup> mean difference (95% CI) (n=347) | P Value <sup>a</sup> | Fully-adjusted <sup>c</sup> mean difference after excluding 16 participants diagnosed or treated for dyslipidaemia (95% CI) (n=331) | P Value <sup>a</sup> |
|-----------------------------------------------|-----------------------------------------------|----------------------|--------------------------------------------------------------|----------------------|-------------------------------------------------------------------------------------------------------------------------------------|----------------------|
| ≥ 1 servings/day                              | -2 (-18, 15)                                  |                      | -2 (-20, 15)                                                 |                      | -1 (-20, 17)                                                                                                                        |                      |
| <b>Total energy intake</b><br>(Per 1000 kcal) | -8 (-21, 5)                                   | 0.226                | -5 (-12, 3)                                                  | 0.209                | -4 (-11, 4)                                                                                                                         | 0.365                |
| <b>Age</b>                                    |                                               | 0.106                |                                                              | 0.071                |                                                                                                                                     | 0.099                |
| 40-49                                         | Reference                                     |                      | Reference                                                    |                      | Reference                                                                                                                           |                      |
| 50-59                                         | 4 (-9, 16)                                    |                      | 6 (-6, 19)                                                   |                      | 5 (-9, 18)                                                                                                                          |                      |
| 60 and above                                  | 11 (-2, 25)                                   |                      | 16 (0, 31)                                                   |                      | 15 (-1, 31)                                                                                                                         |                      |
| <b>Sex</b>                                    |                                               | <0.001               |                                                              | <0.001               |                                                                                                                                     | <0.001               |
| Male                                          | Reference                                     |                      | Reference                                                    |                      | Reference                                                                                                                           |                      |
| Female                                        | 21 (10, 32)                                   |                      | 27 (15, 39)                                                  |                      | 24 (11, 36)                                                                                                                         |                      |
| <b>Employment status</b>                      |                                               | 0.432                |                                                              | 0.567                |                                                                                                                                     | 0.581                |
| Unemployed                                    | Reference                                     |                      | Reference                                                    |                      | Reference                                                                                                                           |                      |
| Employed <sup>d</sup>                         | -7 (-20, 6)                                   |                      | 7 (-9, 22)                                                   |                      | 5 (-12, 21)                                                                                                                         |                      |
| Retired                                       | 2 (-21, 24)                                   |                      | 12 (-13, 36)                                                 |                      | 13 (-12, 39)                                                                                                                        |                      |
| <b>Household Wealth Index</b>                 |                                               | 0.692                |                                                              | 0.754                |                                                                                                                                     | 0.952                |
| 1, Poorest                                    | Reference                                     |                      | Reference                                                    |                      | Reference                                                                                                                           |                      |
| 2                                             | -9 (-22, 4)                                   |                      | -8 (-21, 5)                                                  |                      | -7 (-20, 7)                                                                                                                         |                      |
| 3, Wealthiest                                 | -1 (-15, 12)                                  |                      | 0 (-14, 14)                                                  |                      | 2 (-13, 16)                                                                                                                         |                      |
| <b>Physical activity tertile</b>              |                                               | 0.953                |                                                              | 0.430                |                                                                                                                                     | 0.599                |
| 1, least active                               | Reference                                     |                      | Reference                                                    |                      | Reference                                                                                                                           |                      |



1  
2  
3  
4  
5  
6  
7  
8  
9  
10  
11  
12  
13  
14  
15  
16  
17  
18  
19  
20  
21  
22  
23  
24  
25  
26  
27  
28  
29  
30  
31  
32  
33  
34  
35  
36  
37  
38  
39  
40  
41  
42  
43  
44  
45  
46  
47  
48  
49

| Variable                               | Interviewer-adjusted mean difference (95% CI) | P Value <sup>a</sup> | Fully-adjusted <sup>b</sup> mean difference (95% CI) (n=347) | P Value <sup>a</sup> | Fully-adjusted <sup>c</sup> mean difference after excluding 16 participants diagnosed or treated for dyslipidaemia (95% CI) (n=331) | P Value <sup>a</sup> |
|----------------------------------------|-----------------------------------------------|----------------------|--------------------------------------------------------------|----------------------|-------------------------------------------------------------------------------------------------------------------------------------|----------------------|
| 2                                      | 1 (-13, 15)                                   |                      | 2 (-12, 16)                                                  |                      | 4 (-11, 18)                                                                                                                         |                      |
| 3, most active                         | 0 (-15, 15)                                   |                      | 7 (-9, 24)                                                   |                      | 6 (-11, 24)                                                                                                                         |                      |
| <b>Alcohol consumption<sup>e</sup></b> |                                               | 0.315                |                                                              | 0.666                |                                                                                                                                     | 0.641                |
| Non-drinker                            | Reference                                     |                      | Reference                                                    |                      | Reference                                                                                                                           |                      |
| Drinker                                | -7 (-21, 7)                                   |                      | -3 (-18, 11)                                                 |                      | -4 (-18, 11)                                                                                                                        |                      |

<sup>a</sup> Test for categorical variables (cooking oil, sex, employment status, alcohol consumption); t test for continuous variables (total energy intake); test of trend based on median value in each category for ordinal categorical variables (age category, wealth index tertile, food consumption and physical activity categories)

<sup>b</sup> Adjusted for covariates in column 1 as well as interviewer

<sup>c</sup> Excluding those previously diagnosed with hypercholesterolaemia; adjusted for covariates in column 1 as well as interviewer

<sup>d</sup> Self-employed, or government job, or job in private company

<sup>e</sup> According to report of drinking alcohol in the past 30 days

1  
2  
3  
4 1 Only 11% of women and 5% of men reported having ever had their cholesterol levels  
5 2 checked (TABLE 1; FIGURE 3). Among those with hypercholesterolaemia (n=164), 2% of  
6 3 men (1 of 54), and 11% of women (12 of 110) reported being notified by doctors about  
7 4 it, and 2% of men and 7% of women reported taking cholesterol-lowering medications.  
8  
9  
10  
11  
12

## 13 6 DISCUSSION

14  
15  
16 7 In this cross-sectional study among middle-aged and older adults in a peri-urban ward in  
17 8 Dar es Salaam, Tanzania, we found a high prevalence of hypercholesterolaemia. Slightly  
18 9 more than a third of men and half of women had serum total cholesterol levels greater  
19 10 than or equal to 200mg/dL. After adjusting for major confounders, serum total  
20 11 cholesterol was higher by 15 mg/dL among those who used palm oil compared to those  
21 12 who used sunflower oil as the major cooking oil, and showed a significant increasing  
22 13 trend with higher consumption of meat (P=0.017) and lower consumption of fruits and  
23 14 vegetables (P=0.01).  
24  
25  
26  
27  
28  
29  
30  
31  
32

33 16 Mean serum total cholesterol levels for men and women were similar to that reported  
34 17 in other studies conducted in other urban Tanzanian populations.[32, 39, 40] A repeated  
35 18 cross-sectional study reported an increase over time in the prevalence of  
36 19 hypercholesterolaemia in Dar es Salaam with a prevalence of 17% in 1987 versus 30% in  
37 20 1998 in men, and 7% versus 50% in women.[39] The prevalence of  
38 21 hypercholesterolaemia in our sample was higher than that reported by studies  
39 22 conducted between 2008-2014 in rural Uganda (3% men, 8% women),[9] peri-urban  
40 23 Nigeria (2% men, 6% women),[8] and blacks in urban South-Africa (25% men, 23%  
41 24 women),[41] but is lower than that reported in a study from Senegal (54% men, 61%  
42 25 women) that included both urban and rural participants.[42]  
43  
44  
45  
46  
47  
48  
49  
50  
51  
52

53  
54 27 Our estimated association between palm oil versus sunflower oil use and serum total  
55 28 cholesterol is consistent with findings from dietary observational studies and  
56 29 intervention trials. A recent meta-analysis of 30 dietary intervention trials comparing  
57  
58  
59  
60

1  
2  
3 1 diets rich in palm oil with diets rich in vegetable oils low in saturated fatty acids showed  
4 significantly higher total (13.5 mg/dL) and LDL (9.3 mg/dL) cholesterol, and slightly  
5 higher HDL cholesterol (0.8 mg/dL) 2 to 16 weeks after intervention.[21] In addition, a  
6 large case-control study conducted in Costa Rica found that palm oil use compared to  
7 soybean oil use was independently associated with 33% higher odds of myocardial  
8 infarction. [23].  
9  
10  
11  
12  
13  
14

15  
16  
17 8 Higher meat consumption has previously been reported to be associated with higher  
18 serum total cholesterol in Tanzania.[12, 13] Similar to our finding, daily consumption of  
19 meat was found to be associated with 24 mg/dL higher serum total cholesterol levels,  
20 after adjusting for age, select dietary components and resting energy expenditure.[13]  
21  
22  
23  
24  
25  
26  
27  
28  
29  
30  
31  
32  
33  
34  
35  
36  
37  
38  
39  
40  
41  
42  
43  
44  
45  
46  
47  
48  
49  
50  
51  
52  
53  
54  
55  
56  
57  
58  
59  
60

10 10 meat was found to be associated with 24 mg/dL higher serum total cholesterol levels,  
11 after adjusting for age, select dietary components and resting energy expenditure.[13]  
12 Observational studies have also reported lower LDL cholesterol by 2.3mg/dL for every  
13 additional serving of fruits or vegetables.[43-45] The magnitude of 13 mg/dL reduction  
14 in serum total cholesterol that we found for six or more servings of fruits and vegetables  
15 per day is consistent with the reductions in LDL-cholesterol seen in these studies. We  
16 did not find significant associations between serum total cholesterol and fish intake in  
17 men, as reported in previous studies. [12, 13] This could have been due to insufficient  
18 statistical power due to smaller expected effect size for fish intake or higher  
19 measurement error.

20  
21  
22  
23  
24  
25  
26  
27  
28  
29

21 Palm oil is obtained mostly from the middle section (pulp) of the fruits of the tropical  
22 plant *Elaeis guineensis*. [46] Compared with most other vegetable oils, it contains less  
23 unsaturated fat and more saturated fat (nearly 40 to 50% of total fat content) with the  
24 majority being palmitic acid.[46] However, compared with saturated fat from animal  
25 sources, palm oil may have a smaller impact on serum cholesterol because almost 70%  
26 of the palmitic acid is located in the first and third position of the triglycerides, which is  
27 less absorbable than those in the second position (which is the most common position  
28 of palmitic acid in animal fats). [47, 48] Despite these biological differences, evidence  
29 from both observational and experimental studies, as summarized above, points to

1  
2  
3 1 harmful effects of palm oil on serum cholesterol and CVD when substituted for  
4 2 unsaturated fatty acids.  
5  
6  
7 3

8  
9 4 Our study has several limitations. First, due to logistic and financial limitations, we  
10 5 measured serum total cholesterol instead of a full lipid panel. However, data from  
11 6 recent meta-analysis of randomized trials suggests that the effect of substituting palm  
12 7 oil for vegetable oils low in saturated fat on LDL cholesterol levels is larger than that on  
13 8 HDL.[21] Second, the assessment of diet using any method is prone to measurement  
14 9 error which may have resulted in bias. However, it is unlikely that participants with  
15 10 higher serum cholesterol differentially misreport using palm oil in cooking, limiting the  
16 11 impact of such measurement error on our results. Thirdly, the relatively small sample  
17 12 size may have resulted in insufficient statistical power to detect some associations (e.g.  
18 13 with fish intake). There are some important strengths of this study. To our knowledge,  
19 14 this is the first population-based study to report an association between using palm oil  
20 15 for cooking and serum total cholesterol in East Africa. We used a reliable point-of-care  
21 16 lipid testing system that has good clinical agreement with laboratory reference  
22 17 methods.[31] We systematically collected data on and adjusted for potential  
23 18 confounders of the association between diet and serum total cholesterol.  
24  
25  
26  
27  
28  
29  
30  
31  
32  
33  
34  
35  
36  
37  
38  
39  
40  
41  
42  
43  
44  
45  
46  
47  
48  
49  
50  
51  
52  
53  
54  
55  
56  
57  
58  
59  
60

20 Were our findings to be replicated in other studies, they could have important  
21 implications for nutritional policies aimed at CVD prevention. Palm oil is now the major  
22 edible oil in Tanzania and many other developing countries.[49] In Tanzania, more than  
23 half of the palm oil is imported,[50] and it is the second most imported agricultural  
24 commodity.[51] In our study population, more than three-quarters of participants used  
25 palm oil (cost 2500 Tanzanian Shillings  $\approx$  USD1.1 per litre as the major cooking oil with  
26 94% of participants (n=119) in the lowest tertile of wealth using palm oil. Even in the  
27 wealthiest tertile, only 34% (n=123) used sunflower oil (cost 4000 Tanzanian Shillings  $\approx$   
28 USD1.8 per litre). These socioeconomic differentials in palm oil use may affect

1 socioeonomic disparities in cardiovascular disease in the coming years with the burden  
2 shifting more swiftly to poorer households.

3  
4 Policy interventions to address composition of dietary fat have previously been  
5 implemented in Seychelles, Mauritius and Singapore.[27, 52, 53] In the early 1990s,  
6 Seychelles implemented a nationwide program that included increasing use of  
7 unsaturated vegetable oils, which may have contributed to the fairly high rate of decline  
8 in age-standardized CVD mortality of 44% in men and 28% in women over a 22-year  
9 period.[25,52,54] A national NCD prevention program was also implemented in  
10 Mauritius in the late 1980s to reduce saturated fat content of cooking oil by changing  
11 the government subsidized ration oil from palm oil to soybean oil. The observed 31  
12 mg/dL reduction in serum total cholesterol over a period of 5 years,[26, 53] is  
13 compatible with the estimated impact of replacing palm oil with unsaturated vegetable  
14 oil estimated in a recent meta-analysis of dietary intervention trials.[55] Similar policies  
15 can be considered to reduce palm oil intake in Tanzania. However, it should be noted  
16 that edible oils are viewed as necessities,[56] and increasing their price (e.g. by taxation)  
17 without providing healthier alternatives at comparable prices may have unintended  
18 adverse consequences on overall energy consumption or food security.[57-59] Reducing  
19 saturated fat in edible oil by mixing it with other unsaturated oils has been proposed as  
20 a potential intervention in Costa Rica and India,[23, 60] and could be a feasible short-  
21 term intervention in Tanzania.

22  
23 In conclusion, we found that using palm oil for cooking versus sunflower oil, lower  
24 intake of fruits and vegetables and higher intake of meat was strongly associated with  
25 higher serum total cholesterol in this peri-urban population in Tanzania. Dietary policies  
26 aimed at altering these targets can be used to improve lipid profiles and therefore  
27 prevent cardiovascular diseases in Tanzania and other low-income countries with a  
28 similar dietary profile.

29

1 **CONTRIBUTORS** GD, JK, GHL and RMZ conceived and designed the study. GD obtained  
2 the funding. SSK and SF analyzed the data. GD and SSK interpreted the data and drafted  
3 the article, which was revised critically for substantive content by all authors, who  
4 approved the final version for publication. GD, SSK, SF and RMZ had full access to all of  
5 the data (including statistical reports and tables) in the study and can take responsibility  
6 for the integrity of the data and the accuracy of the data analysis. GD is the study  
7 guarantor.

#### 8 **ACKNOWLEDGEMENTS**

9 We thank participants, interviewers, data entry clerks, administrative and support staff,  
10 who generously contributed time and effort for this study, and Patrick Kazonda for  
11 meticulous data management.  
12  
13  
14

15 **FUNDING:** National Institute of Ageing through the Program on Global Demography of  
16 Ageing (PGDA 116508). SSK was supported by the Bernard Lown Scholars in  
17 Cardiovascular Health Program. RMZ was supported by an NIH T32 training grant (CA  
18 09001). The sponsors had no influence on the design and conduct of the study;  
19 collection, management, analysis, and interpretation of the data; and preparation,  
20 review, or approval of the manuscript.  
21  
22

23 **COMPETING INTERESTS:** All authors have completed the ICMJE uniform disclosure form  
24 at [www.icmje.org/coi\\_disclosure.pdf](http://www.icmje.org/coi_disclosure.pdf) (available on request from the corresponding  
25 author) and declare: no support from companies for the submitted work; no  
26 relationships with companies that might have an interest in the submitted work in the  
27 previous three years; their spouses, partners, or children have no financial relationships  
28 that may be relevant to the submitted work; no non-financial interests that may be  
29 relevant to the submitted work.  
30

1  
2  
3 1 **ETHICAL APPROVAL:** The study protocol was approved by the Institutional Review Board  
4 of the Harvard TH Chan School of Public Health and the Research and Publications  
5  
6 2  
7 3 Committee of Muhimbili University of Health and Allied Sciences. All participants gave  
8 informed consent.  
9 4

10 5  
11 6 **DATA SHARING:** No additional data available  
12 7

13 8 **TRANSPARENCY:** The lead authors affirm that the manuscript is an honest, accurate,  
14 and transparent account of the study being reported; that no important aspects of the  
15 study have been omitted; and that any discrepancies from the study as planned have  
16 been explained.  
17 9  
18 10  
19 11  
20 12  
21 13  
22 14  
23 15  
24  
25  
26  
27  
28  
29  
30  
31  
32  
33  
34  
35  
36  
37  
38  
39  
40  
41  
42  
43  
44  
45  
46  
47  
48  
49  
50  
51  
52  
53  
54  
55  
56  
57  
58  
59  
60

Peer review only

1  
2  
3  
4  
5  
6  
7  
8  
9  
10  
11  
12  
13  
14  
15  
16  
17  
18  
19  
20  
21  
22  
23  
24  
25  
26  
27  
28  
29  
30  
31  
32  
33  
34  
35  
36  
37  
38  
39  
40  
41  
42  
43  
44  
45  
46  
47  
48  
49  
50  
51  
52  
53  
54  
55  
56  
57  
58  
59  
60  
  
1 REFERENCES

- 2 1. Unwin N, Setel P, Rashid S et al. Noncommunicable diseases in sub-Saharan  
3 Africa: where do they feature in the health research agenda?  
4 *Bull World Health Organ* 2001;79(10):947-53.
- 5 2. Dalal S, Beunza JJ, Volmink J et al. Non-communicable diseases in sub-Saharan  
6 Africa: what we know now. *Int J Epidemiol*. 2011;40(4):885-901.
- 7 3. Mathers CD, Loncar D. Projections of global mortality and burden of disease  
8 from 2002 to 2030 [dataset]. *Plos Med*. 2006;3(11):e442.[cited 2016 March 02].  
9 Available from:  
10 [http://www.who.int/healthinfo/global\\_burden\\_disease/projections/en/index.](http://www.who.int/healthinfo/global_burden_disease/projections/en/index.html)  
11 [html](http://www.who.int/healthinfo/global_burden_disease/projections/en/index.html). Referenced in doi: 10.1371/journal.pmed.0030442.sd002
- 12 4. Mathers CD, Stevens GA, Mascarenhas MN. Global health risks: mortality and  
13 burden of disease attributable to selected major risks. Geneva, CH: World Health  
14 Organization; 2009.70p.
- 15 5. Prospective Studies Collaboration. Blood cholesterol and vascular mortality by  
16 age, sex, and blood pressure: a meta-analysis of individual data from 61  
17 prospective studies with 55 000 vascular deaths. *Lancet*. 2007;370(9602):1829-  
18 39.
- 19 6. Farzadfar F, Finucane MM, Danaei G et al. National, regional, and global trends in  
20 serum total cholesterol since 1980: systematic analysis of health examination  
21 surveys and epidemiological studies with 321 country-years and 3.0 million  
22 participants. *Lancet*. 2011;377(9765):578-86.
- 23 7. Pessinaba S, Mbaye A, Yabeta GA et al. Prevalence and determinants of  
24 hypertension and associated cardiovascular risk factors: data from a population-  
25 based, cross-sectional survey in Saint Louis, Senegal. *Cardiovasc J Afr*.  
26 2013;24(5):180-3.
- 27 8. Oluyombo R, Olamoyegun MA, Olaifa O et al. Cardiovascular risk factors in semi-  
28 urban communities in southwest Nigeria: Patterns and prevalence. *J Epidemiol*  
29 *Glob Health*. 2015;5(2):167-74.
- 30 9. Asiki G, Murphy GA, Baisley K et al. Prevalence of dyslipidaemia and associated  
31 risk factors in a rural population in South-Western Uganda: a community based  
32 survey. *PloS One*. 2015;10(5):e0126166.



- 1  
2  
3  
4 10. Forouzanfar MH, Alexander L, Anderson HR et al. Global, regional, and national  
5 2 comparative risk assessment of 79 behavioural, environmental and occupational,  
6 3 and metabolic risks or clusters of risks in 188 countries, 1990–2013: a systematic  
7 4 analysis for the Global Burden of Disease Study 2013 [dataset]. *Lancet*.  
8 5 2015;386(10010):2287-323.[cited 2016 March 02]. Available from:  
9 6 <http://ghdx.healthdata.org/gbd-data-tool>
- 11  
12 7 11. Njelekela M, Ikeda K, Mtabaji J et al. Dietary habits, plasma polyunsaturated fatty  
13 8 acids and selected coronary disease risk factors in Tanzania. *East Afr Med J*.  
14 9 2005;82(11):572-8.
- 15  
16  
17  
18 10 12. Njelekela M, Sato T, Nara Y et al. Nutritional variation and cardiovascular risk  
19 11 factors in Tanzania--rural-urban difference. *S Afr Med J*. 2003;93(4):295-9.
- 20  
21  
22 12 13. Njelekela M, Kuga S, Nara Y et al. Prevalence of obesity and dyslipidemia in middle-  
23 13 aged men and women in Tanzania, Africa: relationship with resting energy  
24 14 expenditure and dietary factors. *J Nutr Sci Vitaminol (Tokyo)*. 2002;48(5):352-8.
- 25  
26  
27 15 14. Pauletto P, Puato M, Angeli MT et al. Blood pressure, serum lipids, and fatty acids in  
28 16 populations on a lake-fish diet or on a vegetarian diet in Tanzania. *Lipids*.  
29 17 1996;31Suppl:S309-12.
- 30  
31  
32 18 15. Marcovina SM, Kennedy H, Bon GB et al. Fish intake, independent of apo(a) size,  
33 19 accounts for lower plasma lipoprotein(a) levels in Bantu fishermen of Tanzania: The  
34 20 Lugalawa Study. *Arterioscler Thromb Vasc Biol*. 1999;19(5):1250-6.
- 35  
36  
37  
38 21 16. Asiki G, Murphy GA, Baisley K et al. Prevalence of dyslipidaemia and associated risk  
39 22 factors in a rural population in South-Western Uganda: a community based survey.  
40 23 *PLoS One*. 2015;10(5):e0126166.
- 41  
42  
43 24 17. Shaper AG, Jones KW. Serum-cholesterol, diet, and coronary heart-disease in  
44 25 Africans and Asians in Uganda. *Int J Epidemiol*. 2012;41(5):1221-5.
- 45  
46  
47 26 18. Devarajan S, Singh R, Chatterjee B et al. A blend of sesame oil and rice bran oil  
48 27 lowers blood pressure and improves the lipid profile in mild-to-moderate  
49 28 hypertensive patients. *J Clin Lipidol*. 2016;10(2):339-49.
- 50  
51  
52 29 19. Huth PJ, Fulgoni VL, Larson BT. A Systematic Review of High-Oleic Vegetable Oil  
53 30 Substitutions for Other Fats and Oils on Cardiovascular Disease Risk Factors:  
54 31 Implications for Novel High-Oleic Soybean Oils. *Adv Nutr*. 2015;6(6):674-93.
- 55  
56  
57  
58  
59  
60

- 1  
2  
3 1 20. Eyres L, Eyres MF, Chisholm A et al. Coconut oil consumption and cardiovascular  
4 risk factors in humans. *Nutr Rev.* 2016:nuw002.  
5  
6  
7 3 21. Sun Y, Neelakantan N, Wu Y et al. Palm Oil Consumption Increases LDL Cholesterol  
8 Compared with Vegetable Oils Low in Saturated Fat in a Meta-Analysis of Clinical  
9 Trials. *J Nutr.* 2015;145(7):1549-58  
10  
11  
12 6 22. Zatonski W, Campos H, Willett W. Rapid declines in coronary heart disease  
13 mortality in Eastern Europe are associated with increased consumption of oils rich  
14 in alpha-linolenic acid. *Eur J Epidemiol.* 2008;23(1):3-10.  
15  
16  
17 9 23. Kabagambe EK, Baylin A, Ascherio A et al. The type of oil used for cooking is  
18 associated with the risk of nonfatal acute myocardial infarction in Costa Rica. *J Nutr.*  
19 2005;135(11):2674-9.  
20  
21  
22  
23 12 24. Zhang J, Kesteloot H. Differences in all-cause, cardiovascular and cancer mortality  
24 between Hong Kong and Singapore: Role of nutrition. *Eur J Epidemiol.*  
25 2001;17(5):469-77.  
26  
27  
28 15 25. Bovet P, Romain S, Shamlaye C et al. Divergent fifteen-year trends in traditional and  
29 cardiometabolic risk factors of cardiovascular diseases in the Seychelles. *Cardiovasc*  
30 *Diabetol.* 2009;8(1):1.  
31  
32  
33  
34 18 26. Uusitalo U, Feskens EJ, Tuomilehto J et al. Fall in total cholesterol concentration  
35 over five years in association with changes in fatty acid composition of cooking oil  
36 in Mauritius: cross sectional survey. *BMJ.* 1996;313(7064):1044-6  
37  
38  
39 21 27. Ho O. Switching to healthier fare just got easier for eateries. The Straits Times  
40 [Internet]. Ministry of Communications and Information, Government of  
41 Singapore.2015 [cited 2016 March 23]. Available from:  
42 [https://www.gov.sg/~media/gov/files/media/20150119\\_st\\_switching\\_to\\_healthie](https://www.gov.sg/~media/gov/files/media/20150119_st_switching_to_healthier_fare_just_got_easier_for_eateries0f1c.pdf)  
43 [r\\_fare\\_just\\_got\\_easier\\_for\\_eateries0f1c.pdf](https://www.gov.sg/~media/gov/files/media/20150119_st_switching_to_healthier_fare_just_got_easier_for_eateries0f1c.pdf)  
44  
45  
46  
47 26 28. Bovet P, Shamlaye C, Gabriel A et al. Prevalence of cardiovascular risk factors in a  
48 middle-income country and estimated cost of a treatment strategy. *BMC Public*  
49 *health.* 2006;6(1):1.  
50  
51  
52 29 29. Kinabo J, Mnkeni AP, Nyaruhucha CN et al. Feeding frequency and nutrient content  
53 of foods commonly consumed in the Iringa and Morogoro regions in Tanzania. *Int J*  
54 *Food Sci Nutr.* 2006;57(1-2):9-17.  
55  
56  
57  
58  
59  
60

- 1  
2  
3 1 30. Matteucci E, Bartola LD, Rossi L et al. Improving CardioCheck PA analytical  
4 2 performance: three-year study. *Clin Chem Lab Med*. 2014;52(9):1291-6.  
5  
6  
7 3 31. dos Santos Ferreira CE, França CN, Correr CJ, Zucker ML et al. Clinical correlation  
8 4 between a point-of-care testing system and laboratory automation for lipid profile.  
9 5 *Clinica Chimica Acta*. 2015;446:263-6.  
10  
11  
12 6 32. Njelekela MA, Mpembeni R, Muhihi A et al. Gender-related differences in the  
13 7 prevalence of cardiovascular disease risk factors and their correlates in urban  
14 8 Tanzania. *BMC Cardiovasc Disord*. 2009;9:30.  
15  
16  
17 9 33. Lukmanji Z, Hertzmark E, Mlingi N et al. Tanzania food composition tables  
18 10 [Internet]. Dar es Salaam, TZ: Muhimbili University of Health and Allied Sciences;  
19 11 Tanzania Food and Nutrition Centre; Harvard School of Public Health; 2008 [cited  
20 12 2015 March 15]. Available from:  
21 13 <https://www.hsph.harvard.edu/nutritionsource/food-tables/>  
22  
23  
24  
25 14 34. World Health Organization. Obesity: Preventing and Managing the Global Epidemic.  
26 15 Report of a WHO Consultation. [Internet]. Geneva, CH: World Health Organization;  
27 16 2000 [cited 2016 March 18].253p. WHO Technical Report Series, No 894. Available  
28 17 from [http://whqlibdoc.who.int/trs/WHO\\_TRS\\_894.pdf](http://whqlibdoc.who.int/trs/WHO_TRS_894.pdf)  
29  
30  
31 18 35. World Health Organization. Prevention of Noncommunicable Diseases Department.  
32 19 Global Physical Activity Questionnaire (GPAQ) Analysis Guide [Internet]. Geneva,  
33 20 CH: World Health Organization; 2014 [cited 2014 January 07].23p. Available from:  
34 21 [http://www.who.int/chp/steps/resources/GPAQ\\_Analysis\\_Guide.pdf](http://www.who.int/chp/steps/resources/GPAQ_Analysis_Guide.pdf)  
35  
36  
37 22  
38 23 36. Filmer D, Pritchett LH. Estimating wealth effects without expenditure data—or  
39 24 tears: an application to educational enrollments in states of India. *Demography*.  
40 25 2001;38(1):115-32.  
41  
42  
43 26 37. Davis RE, Couper MP, Janz NK et al. Interviewer effects in public health surveys.  
44 27 *Health Educ Res*. 2010;25(1):14-26.  
45  
46  
47 28 38. Himelein K. Interviewer effects in subjective survey questions: evidence from  
48 29 Timor-Leste. *Int J Public Opin Res*. 2015:edv031.  
49  
50  
51 30 39. Njelekela M, Negishi H, Nara Y et al. Cardiovascular risk factors in Tanzania: a  
52 31 revisit. *Acta Trop*. 2001;79(3):231-9.  
53  
54  
55 32 40. Njelekela MA, Negishi H, Nara Y et al. Obesity and lipid profiles in middle aged men  
56 33 and women in Tanzania. *East Afr Med J*. 2002;79(2):58-64.  
57  
58  
59  
60

- 1  
2  
3 1 41. Peer N, Steyn K, Lombard C et al. Alarming rise in prevalence of atherogenic  
4 2 dyslipidaemia in the black population of Cape Town: the Cardiovascular Risk in  
5 3 Black South Africans (CRIBSA) study. *Eur J Prev Cardiol*. 2014;21(12):1549-56.  
6  
7  
8  
9 4 42. Doupa D, Seck SM, Dia CA et al. Dyslipidemia, obesity and other cardiovascular risk  
10 5 factors in the adult population in Senegal. *Pan Afr Med J*. 2014;19:181.  
11  
12  
13 6 43. Fornés NS, Martins IS, Hernan M et al. Food frequency consumption and  
14 7 lipoproteins serum levels in the population of an urban area, Brazil. *Rev Saude*  
15 8 *Publica*. 2000;34(4):380-7.  
16  
17  
18 9 44. Mirmiran P, Noori N, Zavareh MB et al. Fruit and vegetable consumption and risk  
19 10 factors for cardiovascular disease. *Metabolism*. 2009;58(4):460-8.  
20  
21  
22 11 45. Djoussé L, Arnett DK, Coon H et al. Fruit and vegetable consumption and LDL  
23 12 cholesterol: the national heart, lung, and blood institute family heart study. *Am J*  
24 13 *Clin Nutr*. 2004;79(2):213-7.  
25  
26  
27 14 46. Edem DO. Palm oil: Biochemical, physiological, nutritional, hematological and  
28 15 toxicological aspects: A review. *Plant Foods Hum Nutr* 2002;57(3-4):319-41.  
29  
30  
31 16 47. Zhao H, Lu Z, Bie X et al. [Analysis of positional distribution of fatty acids in  
32 17 triacylglycerols from lard by high performance liquid chromatography]. *Se pu*.  
33 18 2005;23(2):142-5.  
34  
35  
36  
37 19 48. Hunter JE. Studies on effects of dietary fatty acids as related to their position on  
38 20 triglycerides. *Lipids*. 2001;36(7):655-68.  
39  
40  
41 21 49. Foreign Agricultural Service, United States Department of Agriculture. Oilseeds:  
42 22 World Markets and Trade [Internet]. Washington, DC: USDA; 2017 [cited 2017  
43 23 January 13]. 36 p. Available from:  
44 24 <https://apps.fas.usda.gov/psdonline/circulars/oilseeds.pdf>  
45  
46  
47 25 50. KPMG BPA Co.Ltd. Potential opportunities for investors [Internet].Tabora, TZ:  
48 26 KPMG International; 2011 [cited 2016 March 18]. 44p. Available from:  
49 27 <http://mci.ei.columbia.edu/files/2012/12/kpmg-tabora-report.pdf>  
50  
51  
52 28 51. Tanzania Data Portal [Internet]. Dar es Salaam, TZ: Tanzania National Bureau of  
53 29 Statistics. 2014 [cited 2016 March 23]. Available from:  
54 30 [http://tanzania.opendataforafrica.org/uelwzeb/tanzania-fao-stat-water-resources-](http://tanzania.opendataforafrica.org/uelwzeb/tanzania-fao-stat-water-resources-agriculture-production-and-trade)  
55 31 [agriculture-production-and-trade](http://tanzania.opendataforafrica.org/uelwzeb/tanzania-fao-stat-water-resources-agriculture-production-and-trade)  
56  
57  
58  
59  
60

1  
2  
3  
4  
5  
6  
7  
8  
9  
10  
11  
12  
13  
14  
15  
16  
17  
18  
19  
20  
21  
22  
23  
24  
25  
26  
27  
28  
29  
30  
31  
32  
33  
34  
35  
36  
37  
38  
39  
40  
41  
42  
43  
44  
45  
46  
47  
48  
49  
50  
51  
52  
53  
54  
55  
56  
57  
58  
59  
60

- 1 52. Bovet P, Viswanathan B, Shamlaye C et al. Addressing non-communicable diseases  
2 in the Seychelles: towards a comprehensive plan of action. *Glob Health Promot.*  
3 2010;17(2 suppl):37-40.
- 4 53. Dowse GK, Gareeboo H, Alberti KGM et al. Changes in population cholesterol  
5 concentrations and other cardiovascular risk factor levels after five years of the  
6 non-communicable disease intervention programme in Mauritius. *BMJ.*  
7 1995;311(7015):1255-9.
- 8 54. Stringhini S, Sinon F, Didon J et al. Declining stroke and myocardial infarction  
9 mortality between 1989 and 2010 in a country of the African region. *Stroke.*  
10 2012;43(9):2283-8.
- 11 55. Fattore E, Bosetti C, Brighenti F et al. Palm oil and blood lipid-related markers of  
12 cardiovascular disease: a systematic review and meta-analysis of dietary  
13 intervention trials. *Am J Clin Nutr.* 2014;99(6):1331-50.
- 14 56. Weliwita A, Nyange D, Tsujii H. Food demand patterns in Tanzania: A censored  
15 regression analysis of microdata. *Sri Lankan J Agric Econ.* 2011;5.
- 16 57. Basu S, Babiarz KS, Ebrahim S et al. Palm oil taxes and cardiovascular disease  
17 mortality in India: economic-epidemiologic model. *BMJ* 2013;347:f6048.
- 18 58. Wodon QT, Tsimpo C, Backiny-Yetna P et al. Potential impact of higher food prices  
19 on poverty: summary estimates for a dozen west and central African countries  
20 [Internet]. Washington, DC: World Bank; 2008 [cited 2016 March 18]. 33p. World  
21 Bank Policy Research Working Paper No. 4745. Available from:  
22 <http://documents.worldbank.org/>
- 23 59. Wodon QT, Zaman H. Rising food prices in Sub-Saharan Africa: Poverty impact and  
24 policy responses [Internet]. Washington, DC: World Bank; 2008 [cited 2016 March  
25 18]. 28p. World Bank Policy Research Working Paper No. 4738. Available from:  
26 <http://documents.worldbank.org/>
- 27 60. Downs SM, Thow A-M, Ghosh-Jerath S et al. The feasibility of multisectoral policy  
28 options aimed at reducing trans fats and encouraging its replacement with  
29 healthier oils in India. *Health Policy Plan.* 2014:czu031.

1  
2  
3 **Figure legends**  
4

5  
6 **Figure 1.** Selection of study participants, DUCS-HTN biomarker sub-study, 2014  
7

8  
9 **Figure 2.** Association between diet and serum total cholesterol. Values were adjusted  
10 for age, sex, socioeconomic status, food consumption frequency, total energy intake,  
11 major cooking oil used, physical activity and alcohol consumption.  
12

13  
14 **Figure 3.** Diagnosis, awareness and treatment of hypercholesterolaemia in men (Part A;  
15 n=54 for all percentages) and women (Part B; n=110 for all percentages) in the DUCS-  
16 HTN biomarker sub-study, 2014.  
17  
18  
19  
20  
21  
22  
23  
24  
25  
26  
27  
28  
29  
30  
31  
32  
33  
34  
35  
36  
37  
38  
39  
40  
41  
42  
43  
44  
45  
46  
47  
48  
49  
50  
51  
52  
53  
54  
55  
56  
57  
58  
59  
60

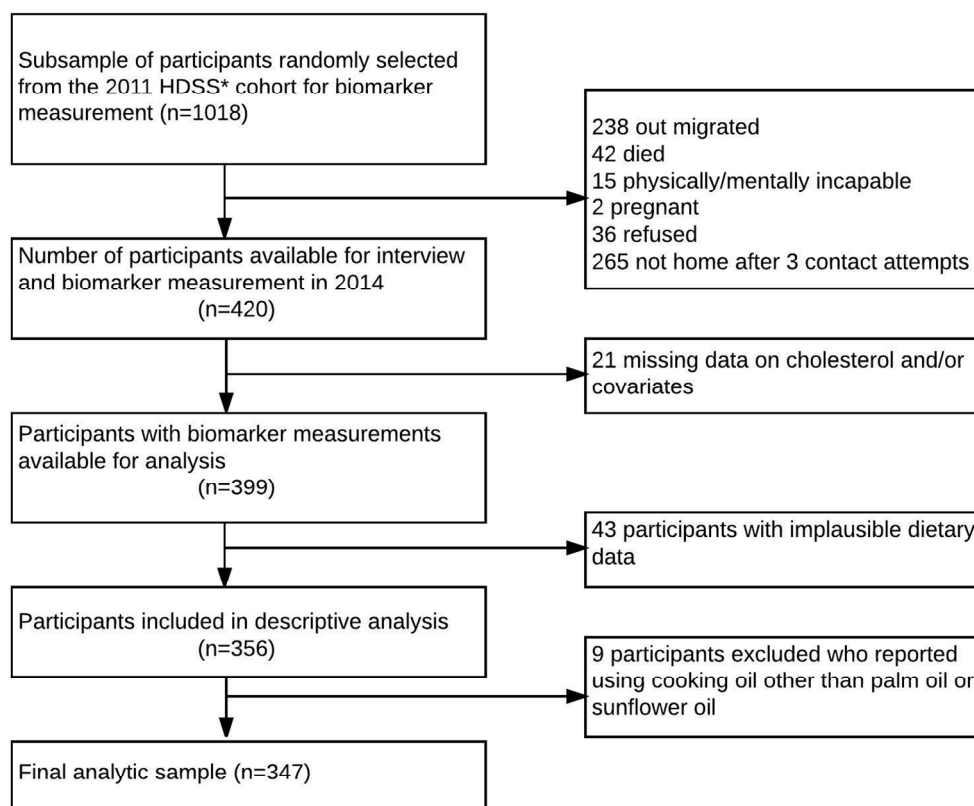

\*Dar Es Salaam Health and Demographic Surveillance System

Figure 1. Selection of study participants, DUCS-HTN biomarker sub-study, 2014

127x111mm (300 x 300 DPI)

only

1  
2  
3  
4  
5  
6  
7  
8  
9  
10  
11  
12  
13  
14  
15  
16  
17  
18  
19  
20  
21  
22  
23  
24  
25  
26  
27  
28  
29  
30  
31  
32  
33  
34  
35  
36  
37  
38  
39  
40  
41  
42  
43  
44  
45  
46  
47  
48  
49  
50  
51  
52  
53  
54  
55  
56  
57  
58  
59  
60

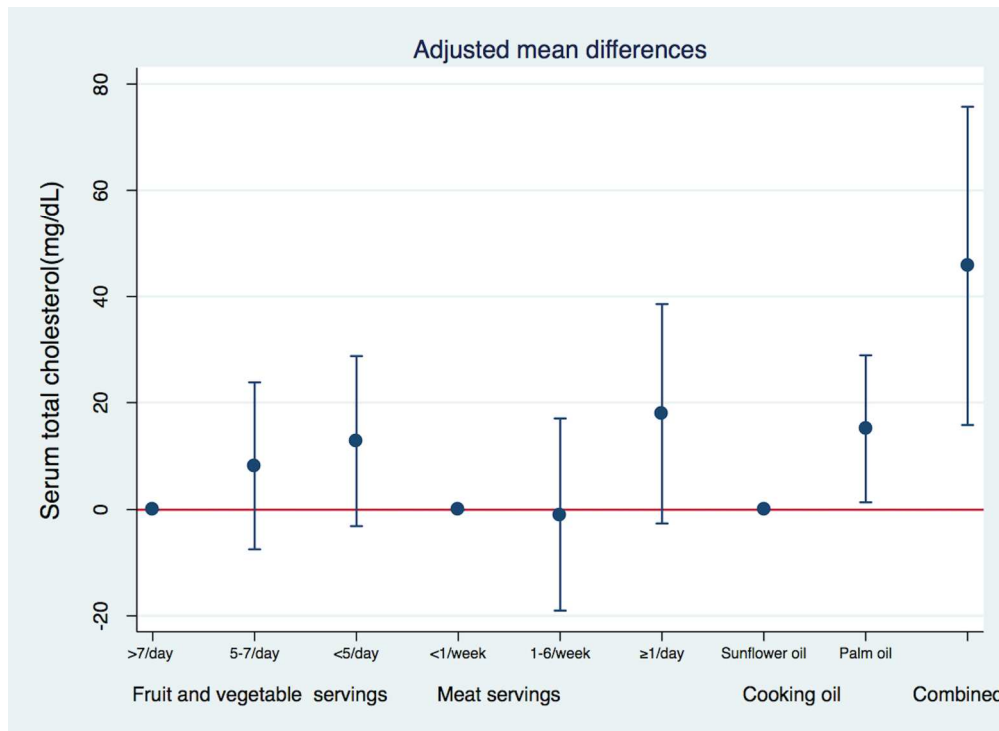

Figure 2. Association between diet and serum total cholesterol. Values were adjusted for age, sex, socioeconomic status, food consumption frequency, total energy intake, cooking oil, physical activity and alcohol consumption.

155x113mm (300 x 300 DPI)

View Only

1  
2  
3  
4  
5  
6  
7  
8  
9  
10  
11  
12  
13  
14  
15  
16  
17  
18  
19  
20  
21  
22  
23  
24  
25  
26  
27  
28  
29  
30  
31  
32  
33  
34  
35  
36  
37  
38  
39  
40  
41  
42  
43  
44  
45  
46  
47  
48  
49  
50  
51  
52  
53  
54  
55  
56  
57  
58  
59  
60



1  
2  
3  
4  
5  
6  
7  
8  
9  
10  
11  
12  
13  
14  
15  
16  
17  
18  
19  
20  
21  
22  
23  
24  
25  
26  
27  
28  
29  
30  
31  
32  
33  
34  
35  
36  
37  
38  
39  
40  
41  
42  
43  
44  
45  
46  
47  
48  
49  
50  
51  
52  
53  
54  
55  
56  
57  
58  
59  
60

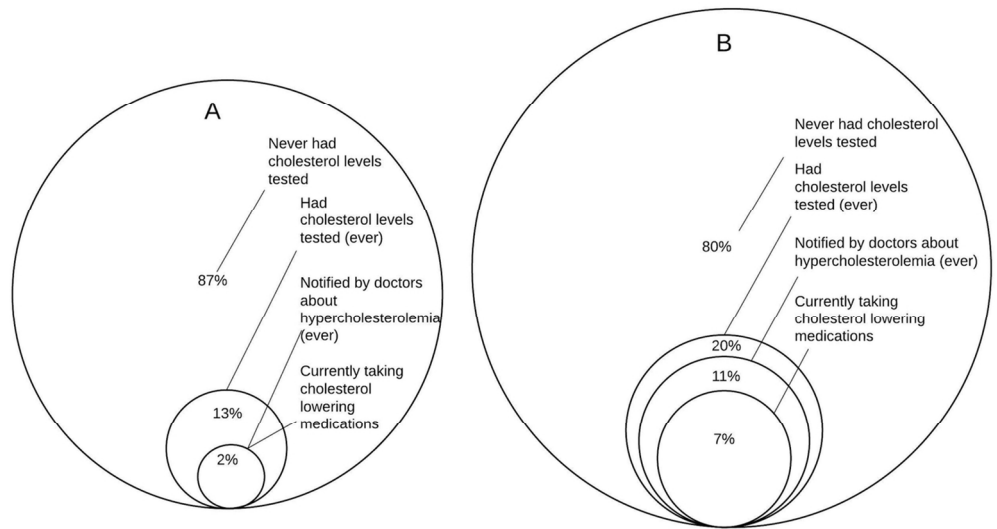

Figure 3. Diagnosis, awareness and treatment of hypercholesterolaemia in men (Part A; n=54 for all percentages) and women (Part B; n=110 for all percentages) in the DUCS-HTN biomarker sub-study, 2014.

114x60mm (300 x 300 DPI)

review only

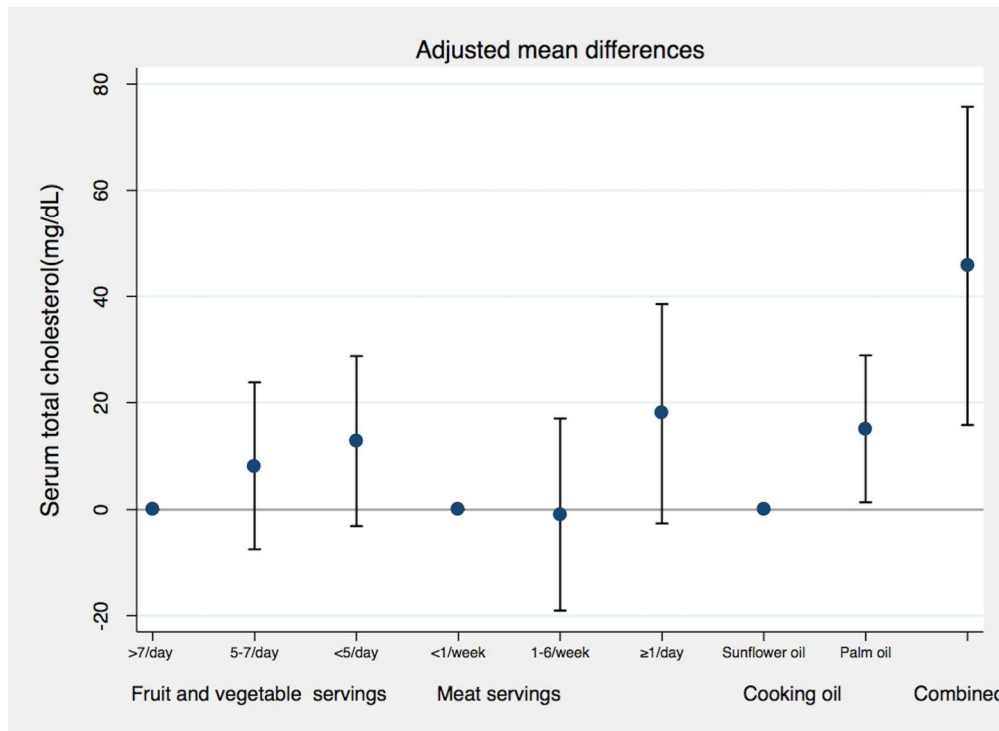

Figure 2. Association between diet and serum total cholesterol. Values were adjusted for age, sex, socioeconomic status, food consumption frequency, total energy intake, cooking oil, physical activity and alcohol consumption

155x112mm (300 x 300 DPI)

ew only

1  
2  
3  
4  
5  
6  
7  
8  
9  
10  
11  
12  
13  
14  
15  
16  
17  
18  
19  
20  
21  
22  
23  
24  
25  
26  
27  
28  
29  
30  
31  
32  
33  
34  
35  
36  
37  
38  
39  
40  
41  
42  
43  
44  
45  
46  
47  
48  
49  
50  
51  
52  
53  
54  
55  
56  
57  
58  
59  
60

STROBE Statement—Checklist of items that should be included in reports of *cross-sectional studies*

|                              | Item No | Recommendation                                                                                                                                                                                                                                                                                                                                                                                                                                                      |
|------------------------------|---------|---------------------------------------------------------------------------------------------------------------------------------------------------------------------------------------------------------------------------------------------------------------------------------------------------------------------------------------------------------------------------------------------------------------------------------------------------------------------|
| <b>Title and abstract</b>    | 1       | (a) Indicate the study's design with a commonly used term in the title or the abstract <a href="#">[Within the title page 1 and method section of the abstract page 2]</a><br>(b) Provide in the abstract an informative and balanced summary of what was done and what was found <a href="#">[See results section of the abstract page 2]</a>                                                                                                                      |
| <b>Introduction</b>          |         |                                                                                                                                                                                                                                                                                                                                                                                                                                                                     |
| Background/rationale         | 2       | Explain the scientific background and rationale for the investigation being reported <a href="#">[page 4]</a>                                                                                                                                                                                                                                                                                                                                                       |
| Objectives                   | 3       | State specific objectives, including any prespecified hypotheses <a href="#">[page 4]</a>                                                                                                                                                                                                                                                                                                                                                                           |
| <b>Methods</b>               |         |                                                                                                                                                                                                                                                                                                                                                                                                                                                                     |
| Study design                 | 4       | Present key elements of study design early in the paper <a href="#">[page 5]</a>                                                                                                                                                                                                                                                                                                                                                                                    |
| Setting                      | 5       | Describe the setting, locations, and relevant dates, including periods of recruitment, exposure, follow-up, and data collection <a href="#">[page 5]</a>                                                                                                                                                                                                                                                                                                            |
| Participants                 | 6       | (a) Give the eligibility criteria, and the sources and methods of selection of participants <a href="#">[page 5]</a>                                                                                                                                                                                                                                                                                                                                                |
| Variables                    | 7       | Clearly define all outcomes, exposures, predictors, potential confounders, and effect modifiers. Give diagnostic criteria, if applicable <a href="#">[page 5-6]</a>                                                                                                                                                                                                                                                                                                 |
| Data sources/<br>measurement | 8*      | For each variable of interest, give sources of data and details of methods of assessment (measurement). Describe comparability of assessment methods if there is more than one group <a href="#">[page 5-6]</a>                                                                                                                                                                                                                                                     |
| Bias                         | 9       | Describe any efforts to address potential sources of bias <a href="#">[page 6]</a>                                                                                                                                                                                                                                                                                                                                                                                  |
| Study size                   | 10      | Explain how the study size was arrived at <a href="#">[page 5]</a>                                                                                                                                                                                                                                                                                                                                                                                                  |
| Quantitative variables       | 11      | Explain how quantitative variables were handled in the analyses. If applicable, describe which groupings were chosen and why <a href="#">[page 6]</a>                                                                                                                                                                                                                                                                                                               |
| Statistical methods          | 12      | (a) Describe all statistical methods, including those used to control for confounding <a href="#">[page 6-7]</a><br>(b) Describe any methods used to examine subgroups and interactions <a href="#">[page 7]</a><br>(c) Explain how missing data were addressed <a href="#">[page 6]</a><br>(d) If applicable, describe analytical methods taking account of sampling strategy <a href="#">[N/A]</a><br>(e) Describe any sensitivity analyses <a href="#">[N/A]</a> |
| <b>Results</b>               |         |                                                                                                                                                                                                                                                                                                                                                                                                                                                                     |
| Participants                 | 13*     | (a) Report numbers of individuals at each stage of study—eg numbers potentially eligible, examined for eligibility, confirmed eligible, included in the study, completing follow-up, and analysed <a href="#">[page 7 and Figure 1]</a><br>(b) Give reasons for non-participation at each stage <a href="#">[Figure 1]</a><br>(c) Consider use of a flow diagram <a href="#">[Figure 1]</a>                                                                         |
| Descriptive data             | 14*     | (a) Give characteristics of study participants (eg demographic, clinical, social) and information on exposures and potential confounders <a href="#">[page 7]</a><br>(b) Indicate number of participants with missing data for each variable of interest <a href="#">[Figure 1]</a>                                                                                                                                                                                 |
| Outcome data                 | 15*     | Report numbers of outcome events or summary measures <a href="#">[page 7-8 and Figure 3]</a>                                                                                                                                                                                                                                                                                                                                                                        |
| Main results                 | 16      | (a) Give unadjusted estimates and, if applicable, confounder-adjusted estimates and their precision (eg, 95% confidence interval). Make clear which confounders were adjusted for and why they were included <a href="#">[page 12 and Table 2]</a>                                                                                                                                                                                                                  |

|                          |    |                                                                                                                                                                                         |
|--------------------------|----|-----------------------------------------------------------------------------------------------------------------------------------------------------------------------------------------|
|                          |    | (b) Report category boundaries when continuous variables were categorized [table 1]                                                                                                     |
|                          |    | (c) If relevant, consider translating estimates of relative risk into absolute risk for a meaningful time period [N/A]                                                                  |
| Other analyses           | 17 | Report other analyses done—eg analyses of subgroups and interactions, and sensitivity analyses [N/A]                                                                                    |
| <b>Discussion</b>        |    |                                                                                                                                                                                         |
| Key results              | 18 | Summarise key results with reference to study objectives [page 14]                                                                                                                      |
| Limitations              | 19 | Discuss limitations of the study, taking into account sources of potential bias or imprecision. Discuss both direction and magnitude of any potential bias [page 16]                    |
| Interpretation           | 20 | Give a cautious overall interpretation of results considering objectives, limitations, multiplicity of analyses, results from similar studies, and other relevant evidence [page 14,16] |
| Generalisability         | 21 | Discuss the generalisability (external validity) of the study results [page 17]                                                                                                         |
| <b>Other information</b> |    |                                                                                                                                                                                         |
| Funding                  | 22 | Give the source of funding and the role of the funders for the present study and, if applicable, for the original study on which the present article is based [page 20]                 |

\*Give information separately for exposed and unexposed groups.

**Note:** An Explanation and Elaboration article discusses each checklist item and gives methodological background and published examples of transparent reporting. The STROBE checklist is best used in conjunction with this article (freely available on the Web sites of PLoS Medicine at <http://www.plosmedicine.org/>, Annals of Internal Medicine at <http://www.annals.org/>, and Epidemiology at <http://www.epidem.com/>). Information on the STROBE Initiative is available at [www.strobe-statement.org](http://www.strobe-statement.org).

# BMJ Open

## Dietary determinants of serum total cholesterol among middle-aged and older adults: a population-based cross-sectional study in Dar es Salaam, Tanzania

|                                 |                                                                                                                                                                                                                                                                                                                                                                                                                                                                                                                                                                                                                                                                                                                                                                                                                                                                                                                                                                                                          |
|---------------------------------|----------------------------------------------------------------------------------------------------------------------------------------------------------------------------------------------------------------------------------------------------------------------------------------------------------------------------------------------------------------------------------------------------------------------------------------------------------------------------------------------------------------------------------------------------------------------------------------------------------------------------------------------------------------------------------------------------------------------------------------------------------------------------------------------------------------------------------------------------------------------------------------------------------------------------------------------------------------------------------------------------------|
| Journal:                        | <i>BMJ Open</i>                                                                                                                                                                                                                                                                                                                                                                                                                                                                                                                                                                                                                                                                                                                                                                                                                                                                                                                                                                                          |
| Manuscript ID                   | bmjopen-2016-015028.R2                                                                                                                                                                                                                                                                                                                                                                                                                                                                                                                                                                                                                                                                                                                                                                                                                                                                                                                                                                                   |
| Article Type:                   | Research                                                                                                                                                                                                                                                                                                                                                                                                                                                                                                                                                                                                                                                                                                                                                                                                                                                                                                                                                                                                 |
| Date Submitted by the Author:   | 07-Feb-2017                                                                                                                                                                                                                                                                                                                                                                                                                                                                                                                                                                                                                                                                                                                                                                                                                                                                                                                                                                                              |
| Complete List of Authors:       | Kakarmath, Sujay; Harvard T.H. Chan School of Public Health, Global Health and Population<br>Zack, Rachel; Harvard T.H. Chan School of Public Health, Epidemiology<br>Leyna, Germana; Muhimbili University of Health and Allied Sciences, Epidemiology & Biostatistics, School of Public Health<br>Fahimi, Saman; Harvard T.H. Chan School of Public Health, Global Health and Population<br>Liu, Enju; Harvard T.H. Chan School of Public Health, Global Health and Population<br>Fawzi, Wafaie; Harvard T.H. Chan School of Public Health, Global Health and Population, Epidemiology, Nutrition<br>Lukmanji, Zohra; World Food Program; Tumaini Hospital<br>Killewo, Japhet; Muhimbili University of Health and Allied Sciences, Epidemiology & Biostatistics, School of Public Health<br>Sacks, Frank; Harvard T.H. Chan School of Public Health, Nutrition, Genetics and Complex Diseases<br>Danaei, Goodarz; Harvard T.H. Chan School of Public Health, Global Health and Population, Epidemiology |
| <b>Primary Subject Heading</b>: | Nutrition and metabolism                                                                                                                                                                                                                                                                                                                                                                                                                                                                                                                                                                                                                                                                                                                                                                                                                                                                                                                                                                                 |
| Secondary Subject Heading:      | Epidemiology, Public health, Global health, Cardiovascular medicine                                                                                                                                                                                                                                                                                                                                                                                                                                                                                                                                                                                                                                                                                                                                                                                                                                                                                                                                      |
| Keywords:                       | cholesterol, palm oil, diet, Nutrition < TROPICAL MEDICINE, Tanzania, sub-Saharan Africa                                                                                                                                                                                                                                                                                                                                                                                                                                                                                                                                                                                                                                                                                                                                                                                                                                                                                                                 |
|                                 |                                                                                                                                                                                                                                                                                                                                                                                                                                                                                                                                                                                                                                                                                                                                                                                                                                                                                                                                                                                                          |

SCHOLARONE™  
Manuscripts

1  
2  
3  
4 1 **Dietary determinants of serum total cholesterol among middle-aged and older adults:**  
5  
6 2 **a population-based cross-sectional study in Dar es Salaam, Tanzania**  
7  
8 3

9  
10 4 **Authors:** Sujay Kakarmath MBBS Master's student<sup>a</sup>, Rachel M Zack MSc Doctoral  
11 student<sup>b</sup>, Germana H Leyna MD PhD Lecturer<sup>c</sup>, Saman Fahimi MD PhD Postdoctoral  
12 Research Fellow<sup>a</sup>, Enju Liu MD PhD Research Scientist<sup>a</sup>, Wafaie W Fawzi DrPH MBBS  
13 MPH MS Professor<sup>a,b,d</sup>, Zohra Lukmanji MSc Nutrition Consultant<sup>e</sup>, Japhet Killewo  
14 MBCHB DPH MSc PhD Professor<sup>c</sup>, Frank Sacks ScD MD Professor<sup>d</sup>, Goodarz Danaei ScD  
15 MD MS Assistant Professor<sup>a,b</sup>  
16  
17  
18

19  
20 <sup>a</sup> Department of Global Health and Population, Harvard T.H. Chan School of Public  
21 Health, Boston, Massachusetts, USA

22  
23 <sup>b</sup> Department of Epidemiology, Harvard T.H. Chan School of Public Health, Boston,  
24 Massachusetts, USA

25  
26 <sup>c</sup> Department of Epidemiology and Biostatistics, School of Public Health, Muhimbili  
27 University of Health and Allied Sciences, Dar es Salaam, United Republic of Tanzania.  
28

29  
30 <sup>d</sup> Department of Nutrition, Harvard T.H. Chan School of Public Health, Boston,  
31 Massachusetts, USA

32  
33 <sup>e</sup> World food program, Dar es Salaam and Tumaini Hospital, Dar es Salaam, Tanzania  
34  
35

36  
37 20 **Correspondence to:** Goodarz Danaei

38  
39 21 677 Huntington Avenue, 1107, Boston MA 02115

40  
41 22 [gdanaei@hsph.harvard.edu](mailto:gdanaei@hsph.harvard.edu)

42  
43 23 Telephone Number:+1 617 432 5722

44  
45 24 **Word count:** 3397  
46  
47  
48  
49  
50  
51  
52  
53  
54  
55  
56  
57  
58  
59  
60

## 1 ABSTRACT

2  
3 **Objective:** To assess the dietary determinants of serum total cholesterol.

4 **Design:** Cross-sectional population-based study.

5 **Setting:** Peri-urban region of Dar es Salaam, Tanzania.

6 **Participants:** 347 adults aged 40 years and older from the Dar es Salaam Urban Cohort  
7 Hypertension Study (DUCS-HTN).

8 **Main outcome measure:** Serum total cholesterol measured using a point-of-care device.

9 **Results:** Mean serum total cholesterol level was 204 mg/dL (Interquartile range (IQR)  
10 169 to 236 mg/dL) in women and 185 mg/dL (IQR 152 to 216 mg/dL) in men. After  
11 adjusting for demographic, socioeconomic, lifestyle and dietary factors, participants  
12 who reported using palm oil as the major cooking oil had serum total cholesterol higher  
13 by 15 mg/dL (95% confidence interval 1 to 29 mg/dL) compared with those who  
14 reported using sunflower oil. Consumption of one or more servings of meat per day (P  
15 for trend= 0.017) and less than five servings of fruits and vegetables per day (P for  
16 trend= 0.024) were also associated with higher serum total cholesterol. A combination  
17 of using palm oil for cooking, eating more than one serving of meat per day and fewer  
18 than five servings of fruits and vegetables per day was associated with 46 mg/dL (95%  
19 confidence interval 16 to 76 mg/dL) higher serum total cholesterol.

20 **Conclusions:** Using palm oil for cooking was associated with higher serum total  
21 cholesterol levels in this peri-urban population in Dar es Salaam. Reduction of saturated  
22 fat content of edible oil may be considered as a population-based strategy for primary  
23 prevention of cardiovascular diseases.

24 **Key words:** cholesterol, palm oil, diet, nutrition, Tanzania, Sub-Saharan Africa

## 25 26 27 28 29 STRENGTHS AND LIMITATIONS OF THIS STUDY

- 1
- 2
- 3
- 4 1 • This is the first population-based study to report an association between using palm
- 5 2 oil for cooking and serum total cholesterol in East Africa.
- 6
- 7 3 • A reliable point-of care lipid testing system was used to measure serum total
- 8 4 cholesterol that has good clinical agreement with laboratory reference methods.
- 9
- 10 5 • Potential confounders of the association between diet and serum total cholesterol
- 11 6 were systematically measured and adjusted for.
- 12
- 13 7 • Only serum total cholesterol was measured instead of a full lipid panel, due to logistic
- 14 8 and financial limitations.
- 15
- 16 9 • The relatively small sample size may have resulted in insufficient statistical power to
- 17 10 detect some associations.
- 18
- 19 11 • The assessment of diet using any method is prone to measurement error, which may
- 20 12 have resulted in bias, although differential misreporting of cooking oil by cholesterol
- 21 13 level is unlikely.
- 22
- 23
- 24
- 25
- 26
- 27
- 28
- 29 14
- 30 15
- 31
- 32
- 33
- 34
- 35
- 36
- 37
- 38
- 39
- 40
- 41
- 42
- 43
- 44
- 45
- 46
- 47
- 48
- 49
- 50
- 51
- 52
- 53
- 54
- 55
- 56
- 57
- 58
- 59
- 60



## 1 INTRODUCTION

2  
3  
4  
5  
6  
7 Sub-Saharan Africa is facing a burgeoning epidemic of non-communicable diseases  
8 (NCDs) due to changing demographic profiles, epidemiologic transition, urbanization,  
9 and lifestyle changes as a result of economic development as well as increasing survival  
10 of HIV patients.[1, 2] In 2015, one third of all estimated NCD deaths in sub-Saharan  
11 Africa were due to cardiovascular diseases (CVD).[3] By 2030, the share of all deaths  
12 attributable to CVD is projected to increase by nearly 40% in this region.[3]

13  
14  
15  
16  
17  
18  
19  
20  
21  
22  
23  
24  
25  
26  
27  
28  
29  
30  
31  
32  
33  
34  
35  
36  
37  
38  
39  
40  
41  
42  
43  
44  
45  
46  
47  
48  
49  
50  
51  
52  
53  
54  
55  
56  
57  
58  
59  
60  
9 Dyslipidaemia is a well-known risk factor for ischemic heart disease (IHD), stroke, and  
10 other vascular diseases.[4, 5] In middle-aged adults, IHD mortality is lower by as much  
11 as 30 to 50% for every 1 mmol/L (38.6mg/dL) lower serum total cholesterol.[5] Sub-  
12 Saharan Africans have historically had a favorable lipid profile [6] but hyperlipidaemia is  
13 becoming increasingly common in these countries, especially in urban areas.[7-9] It is  
14 estimated that thirty-four percent of ischemic heart disease deaths in Tanzania are  
15 attributable to dyslipidaemia.[10]

16 A few studies have already explored the relationship between diet and serum total  
17 cholesterol in eastern sub-Saharan Africa and reported an association between higher  
18 intake of meat and lower intake of fish and green vegetables with higher serum total  
19 cholesterol. [11-15] However, two of these studies compared rural and coastal Bantu  
20 populations that are known to have, respectively, vegetarian and fish-based diets and  
21 did not measure diet in each participant and based their conclusions on known dietary  
22 differences between ethnic populations. [14, 15] Another study included participants  
23 from rural, urban and pastoral regions of Tanzania but did not report the magnitude of  
24 the association[12] The other two studies conducted in urban Tanzania did not adjust  
25 for potential confounders of the relationship between diet and serum total  
26 cholesterol.[11, 13] There are a few studies from other parts of sub-Saharan Africa that  
27 have looked at the association between diet and serum cholesterol. A study conducted  
28 in a rural population in Uganda found that eating fewer than 5 servings of fruits and

1  
2  
3 1 vegetables daily was associated with higher odds of low HDL cholesterol among men,  
4 2 but lower odds among women.[16] Another study in urban Uganda found lower mean  
5 3 serum total cholesterol in lacto-ovo-vegetarians compared to non-vegetarians.[17]  
6 4  
7 5 Another potential dietary determinant of serum cholesterol is the type of oil used in  
8 6 cooking.[18,19] Using cooking oils with higher saturated fat content such as coconut  
9 7 and palm oil has been associated with higher serum total cholesterol levels in clinical  
10 8 trials and observational studies.[20, 21] Population-level differences in CVD morbidity  
11 9 and mortality is associated with differences in type of cooking oil in eastern  
12 10 European,[22] Costa Rica,[23] and Singapore.[24] Mauritius, Seychelles and Singapore  
13 11 have already implemented policy schemes to reduce saturated fat content of cooking oil  
14 12 as population-level interventions to reduce burden of CVD.[25-27]  
15 13 A thorough understanding of the role of dietary determinants of serum cholesterol will  
16 14 be invaluable in designing population-level interventions to address the growing CVD  
17 15 burden especially considering that treatment for dyslipidaemia is either unavailable or  
18 16 prohibitively expensive for most patients in low-income countries.[28] Tanzanian diet  
19 17 consists predominantly of carbohydrates (mainly maize, sweet potatoes, cassava and  
20 18 rice) consumed with green leafy vegetables, beans or peas and occasionally with meat  
21 19 or fish.[29] Palm oil is the major cooking oil, followed by sunflower oil.

22 20 We conducted a cross-sectional population-based study to assess the association of  
23 21 type of cooking oil (palm vs sunflower oil) and diet (meat, fish, fruit and vegetable  
24 22 consumption) with serum total cholesterol in an adult population in a peri-urban area of  
25 23 Dar es Salaam. We hypothesized that use of palm oil for cooking and higher intake of  
26 24 meat and lower intake of fruits and vegetables will be associated with higher serum  
27 25 total cholesterol.

## 26 **METHODS**

### 27 **Study design and population**

1 The Dar es Salaam Health and Demographic Surveillance System (HDSS) is a  
2 demographic surveillance system in Ukonga and Gongo la Mboto wards of Dar es  
3 Salaam, Tanzania with over 100,000 enumerated individuals living in 21,000 households  
4 followed since 2011/12. For the Dar es Salaam Urban Cohort Hypertension Study (DUCS-  
5 HTN), we randomly selected one large and one small neighborhood in the HDSS and  
6 contacted all adult residents aged 40 years and older, who had been registered in the  
7 HDSS database in 2011 or 2012. A random subsample of one-fifth of the eligible  
8 participants was selected for additional assessment of diet and measurement of serum  
9 total cholesterol. The size of this subsample was determined largely based upon the  
10 availability of resources. Pregnant women and those who were physically and mentally  
11 incapable of completing the interview and measurements were excluded. The  
12 participant selection flowchart is shown in Figure 1. Face-to-face interviews and  
13 measurements were conducted in participant's home from March to June 2014 by six  
14 trained interviewers. All interviewers had previous experience conducting public health  
15 surveys. For this study, interviewers received five days of training and two days of field  
16 practice in a nearby neighborhood. At least three attempts were made to contact all  
17 potential participants. Written informed consent was obtained from all participants.  
18 The study protocol was approved by the Institutional Review Board of the Harvard TH  
19 Chan School of Public Health and the Research and Publications Committee of  
20 Muhimbili University of Health and Allied Sciences.

## 21 **Measurements**

22 Non-fasting serum total cholesterol was measured from 30 micro-liters of finger-prick  
23 capillary blood samples using Cardiochek PA devices (Polymer Technology Systems Inc,  
24 IN, USA).[30, 31] The overall coefficient of variation for this device for total cholesterol  
25 has been determined to be in the range of 1.3 to 2.9%.[30]

26 Data on diet was collected using a semi-quantitative food frequency questionnaire  
27 (FFQ). The FFQ assessed intake of 179 food and drink items over the past 30 days. A  
28 shorter 85-item version of this instrument has been previously used in Tanzania.[32]

1  
2  
3 1 Nutrient intakes were calculated by multiplying the frequency of food consumption  
4 2 measured from FFQ by the nutrient content of the specified portion size using the  
5 3 Tanzanian food composition table.[33] Meat intake was defined to include all red and  
6 4 white meat consumption, excluding fish consumption. Fruit and vegetable intake was  
7 5 defined to include consumption of all fruits and vegetables, except for root vegetables  
8 6 and fruit juice. An additional question was asked to assess the main type of cooking oil:  
9 7 “What is the kind of oil used most often in your home for frying food?”. Frying is the  
10 8 most common cooking technique involving oil use in this region. The reference to a  
11 9 cooking technique was made to distinguish it from other oils that may be used in a  
12 10 household, such as fuels.

13 11 All participants completed a socioeconomic, demographic and lifestyle questionnaire  
14 12 and had their height, weight, waist circumference, hip circumference, and blood  
15 13 pressure measured by trained interviewers. Some demographic information (age, sex,  
16 14 neighborhood, components of wealth index) was taken from the HDSS baseline  
17 15 interview. Body mass index was calculated as weight (kg) divided by height (m) squared,  
18 16 and categorized as underweight (<18.5), normal (18.5 to <25.0), overweight (25.0 to  
19 17 <30.0), and obese (≥30.0).[34] Physical activity was assessed using the Global Physical  
20 18 Activity Questionnaire in the domains of work, transportation, and leisure,[35] and  
21 19 categorized into tertiles of Metabolic Equivalent (MET) hours per week. To measure  
22 20 socioeconomic status, we created a household wealth index using a principal  
23 21 component analysis of household characteristics (floor material, roof material, wall  
24 22 material, electricity), household assets (television, radio, shop, sewing machine, sofa,  
25 23 fan, iron, stove with oven, stove without oven, dining table, cupboard, watch, mobile  
26 24 phone, bike, motorcycle, cart, car, motorboat), and animal ownership (goats, sheep,  
27 25 chicken/ducks, pigs).[36] The household wealth index was categorized into tertiles.

## 26 **Statistical analysis**

27 27 We excluded participants with implausible dietary data (total energy intake <500 or  
28 28 >5000 kcal/day), and with missing data on serum total cholesterol, diet and/or any of  
29 29 the potential covariates.

1 Chi-square tests were used to assess binary variables, F-tests were used for categorical  
2 variables and tests of linear trend based on median value within each category for  
3 ordinal variables with a linear association with serum total cholesterol (i.e. age, wealth  
4 index, and food consumption categories). Mean differences and 95% confidence  
5 intervals in serum total cholesterol across categories of dietary factors, including  
6 cooking oil were estimated using multivariable linear regression. Potential confounders  
7 were included in the model based on a-priori knowledge of lifestyle and socio-  
8 demographic determinants of diet and serum total cholesterol. The fully adjusted model  
9 included age, sex, total energy intake, physical activity, alcohol consumption, wealth  
10 index and employment status as covariates. We also adjusted for interviewer to remove  
11 the effect of any extraneous variation in measurement of subjective risk factors across  
12 interviewers. [37, 38] We examined interactions of potential determinants of serum  
13 total cholesterol with sex, but no interactions were statistically significant at 0.2 level,  
14 therefore we did not include these product terms in the final model. We conducted  
15 sensitivity analyses by excluding 16 participants who reported either being previously  
16 diagnosed with hypercholesterolaemia, or currently taking cholesterol-lowering  
17 medications or being advised by a health professional to modify diet to lower  
18 cholesterol.

19 All analyses were performed using STATA software version 13.1 (STATA Corporation,  
20 College Station, Texas).

## 21 22 **RESULTS**

23 A total of 420 participants were enrolled for the random subsample with diet and  
24 cholesterol measurements. Among these, data on serum total cholesterol and selected  
25 covariates was available for 399 participants. We excluded 43 participants due to  
26 implausible caloric intake. In addition, after descriptive analyses we excluded 9 (2%)  
27 participants who reported using cooking oils other than palm or sunflower oil. The final  
28 analytic sample included 347 participants (FIGURE 1).

29 Forty-two percent of the participants (n=347) were men (TABLE 1). Mean age of men

1 was 55 years (SD 11), and that of women was 52 (SD 10). 44% of the women (n=202)  
2 and 19% of men (n=145) were obese, and one third of men and women were  
3 overweight. Mean energy intake per day was 2413 kcal. Thirty-seven percent of men  
4 and 54% of women were hypercholesterolemic (i.e. had total cholesterol  $\geq$ 200 mg/dL).  
5 Mean serum total cholesterol in women was 204 mg/dL (95% confidence interval 197 to  
6 211 mg/dL) and was significantly higher than that of men at 185 mg/dL (177 to 193  
7 mg/dL). Serum total cholesterol levels were higher in older age groups.  
8 79% of participants reported using palm oil as the major cooking oil and the rest  
9 reported using sunflower oil (TABLE 1). Those who reported using palm oil were most  
10 likely to be in the poorest tertile of wealth, whereas those who reported using  
11 sunflower oil were most likely to be in the wealthiest tertile ( $p<0.001$ ). Those who  
12 reported using sunflower oil had a higher energy intake ( $p=0.04$ ), and reported  
13 consuming meat ( $p=0.004$ ) and dairy ( $p=0.02$ ) more frequently than those who reported  
14 using palm oil. Mean serum total cholesterol in those who reported using palm oil was  
15 199 mg/dL (193 to 205) and was significantly higher than those who reported using  
16 sunflower oil 184 mg/dL (173 to 195).

1 **Table 1.** Participants' characteristics in DUCS-HTN biomarker sub-study, 2014

| Variable                               | All (n=347) | Men (n=145) | Women (n=202) | Use palm oil (n=274) | Use sunflower oil (n=73) |
|----------------------------------------|-------------|-------------|---------------|----------------------|--------------------------|
| <b>Age</b>                             |             |             |               |                      |                          |
| 40-49                                  | 150 (43)    | 56 (39)     | 94 (47)       | 123 (45)             | 27 (37)                  |
| 50-59                                  | 113 (33)    | 43 (30)     | 70 (35)       | 82 (30)              | 31 (42)                  |
| 60 and above                           | 84 (24)     | 46 (32)     | 38 (19)       | 69 (25)              | 15 (21)                  |
| <b>Employment status</b>               |             |             |               |                      |                          |
| Unemployed                             | 83 (24)     | 14 (10)     | 69 (34)       | 70 (26)              | 13 (18)                  |
| Employed (includes self-employed)      | 238 (69)    | 112 (77)    | 126 (62)      | 183 (67)             | 55 (75)                  |
| Retired                                | 26 (7)      | 19 (13)     | 7 (3)         | 21 (8)               | 5 (7)                    |
| <b>Household wealth index</b>          |             |             |               |                      |                          |
| Tertile 1, Poorest                     | 115 (33)    | 49 (34)     | 66 (33)       | 109 (40)             | 6 (8)                    |
| Tertile 2                              | 117 (34)    | 53 (37)     | 64 (32)       | 90 (33)              | 27 (37)                  |
| Tertile 3, Wealthiest                  | 115 (33)    | 43 (30)     | 72 (36)       | 75 (27)              | 40 (55)                  |
| <b>BMI (kg/m<sup>2</sup>)</b>          |             |             |               |                      |                          |
| Underweight (<18.50)                   | 19 (5)      | 13 (9)      | 6 (3)         | 19 (7)               | 0 (0)                    |
| Normal weight (18.50-<25.00)           | 100 (29)    | 56 (39)     | 44 (22)       | 91 (33)              | 9 (12)                   |
| Overweight (25-<30.00)                 | 112 (32)    | 48 (33)     | 64 (32)       | 81 (30)              | 31 (42)                  |
| Obese (≥ 30.00)                        | 116 (33)    | 28 (19)     | 88 (44)       | 83 (30)              | 33 (45)                  |
| <b>Physical activity</b>               |             |             |               |                      |                          |
| Tertile 1,<br>(0-14 MET-hours/week)    | 123 (35)    | 46 (32)     | 77 (38)       | 96 (35)              | 27 (37)                  |
| Tertile 2,<br>(15-112 MET-hours/week)  | 108 (31)    | 38 (27)     | 70 (35)       | 86 (31)              | 22 (30)                  |
| Tertile 3,<br>(113-840 MET-hours/week) | 116 (33)    | 61 (42)     | 55 (27)       | 92 (34)              | 24 (33)                  |

| Variable                             | All (n=347) | Men (n=145) | Women (n=202) | Use palm oil (n=274) | Use sunflower oil (n=73) |
|--------------------------------------|-------------|-------------|---------------|----------------------|--------------------------|
| <b>Alcohol drinking<sup>a</sup></b>  |             |             |               |                      |                          |
| Non-drinker                          | 286 (82)    | 103 (71)    | 183 (91)      | 225 (82)             | 61 (84)                  |
| <b>Smoking</b>                       |             |             |               |                      |                          |
| Non-smoker                           | 278 (81)    | 85 (59)     | 193 (97)      | 210 (78)             | 68 (93)                  |
| Former smoker                        | 43 (13)     | 39 (27)     | 4 (2)         | 38 (14)              | 5 (7)                    |
| Current smoker                       | 22 (6)      | 19 (13)     | 3 (2)         | 22 (8)               | 0 (0)                    |
| <b>DIETARY VARIABLES</b>             |             |             |               |                      |                          |
| <b>Palm oil as major cooking oil</b> | 274 (79)    | 119 (82)    | 155 (77)      |                      |                          |
| <b>Meat intake</b>                   |             |             |               |                      |                          |
| <1 serving/week                      | 41 (12)     | 21 (14)     | 20 (10)       | 36 (13)              | 5 (7)                    |
| 1-6 servings/week                    | 173 (50)    | 55 (38)     | 118 (58)      | 145 (53)             | 28 (38)                  |
| ≥1 servings/day                      | 133 (38)    | 69 (48)     | 64 (32)       | 93 (34)              | 40 (55)                  |
| <b>Fish intake</b>                   |             |             |               |                      |                          |
| < 1 serving/week                     | 41 (12)     | 13 (9)      | 28 (14)       | 31 (11)              | 10 (14)                  |
| 1-7 servings/week                    | 196 (56)    | 76 (52)     | 120 (59)      | 154 (56)             | 42 (58)                  |
| > 1 servings/day                     | 110 (32)    | 56 (39)     | 54 (27)       | 89 (32)              | 21 (29)                  |
| <b>Dairy intake</b>                  |             |             |               |                      |                          |
| < 1 serving/week                     | 159 (46)    | 63 (43)     | 96 (48)       | 136 (50)             | 23 (32)                  |
| 1-6 servings/week                    | 133 (38)    | 65 (45)     | 68 (34)       | 99 (36)              | 34 (47)                  |
| ≥ 1 servings/day                     | 55 (16)     | 17 (12)     | 38 (19)       | 39 (14)              | 16 (22)                  |
| <b>Fruit and vegetable</b>           |             |             |               |                      |                          |
| < 5 servings/day                     | 121 (35)    | 49 (34)     | 72 (36)       | 101 (37)             | 20 (27)                  |
| 5-7 servings/day                     | 68 (20)     | 26 (20)     | 42 (21)       | 54 (20)              | 14 (19)                  |



| Variable                                          | All (n=347)          | Men (n=145)          | Women (n=202)        | Use palm oil (n=274) | Use sunflower oil (n=73) |
|---------------------------------------------------|----------------------|----------------------|----------------------|----------------------|--------------------------|
| >7 servings/day                                   | 158 (46)             | 70 (48)              | 88 (44)              | 119 (43)             | 39 (53)                  |
| <b>Nuts and legumes</b>                           |                      |                      |                      |                      |                          |
| < 1 serving/week                                  | 27 (8)               | 7 (5)                | 20 (10)              | 17 (6)               | 10 (14)                  |
| 1-7 servings/week                                 | 200 (58)             | 87 (60)              | 113 (56)             | 162 (59)             | 38 (52)                  |
| > 1 servings/day                                  | 120 (35)             | 51 (35)              | 69 (34)              | 95 (35)              | 25 (34)                  |
| <b>Total energy intake (kcal/day)<sup>b</sup></b> | 2413<br>(1701, 3215) | 2629<br>(1780, 3216) | 2313<br>(1617, 3207) | 2369<br>(1654, 3150) | 2743<br>(1865, 3606)     |
| <b>Fat intake<sup>b</sup></b>                     |                      |                      |                      |                      |                          |
| Total fat (% of energy)                           | 17 (15, 20)          | 17 (15, 21)          | 17 (15, 20)          | 17 (14, 20)          | 20 (15, 22)              |
| Saturated fat (% energy)                          | 10 (8, 13)           | 10 (8, 13)           | 10 (8, 12)           | 10 (8, 13)           | 10 (8, 11)               |
| Monounsaturated fat (% of energy)                 | 4 (3, 5)             | 4 (3, 5)             | 4 (3, 5)             | 4 (3, 5)             | 4 (4, 5)                 |
| Polyunsaturated fat (% of energy)                 | 2 (1, 2)             | 2 (1, 2))            | 2 (1, 2)             | 1 (1, 2)             | 2 (1, 2)                 |
| <b>Cholesterol</b>                                |                      |                      |                      |                      |                          |
| Serum total cholesterol (mg/dl) <sup>c</sup>      | 196 (3)              | 185 (4)              | 204 (4)              | 199 (3)              | 184 (6)                  |
| Hypercholesterolaemia <sup>d</sup>                | 164 (47)             | 54 (37)              | 110 (54)             | 135 (49)             | 29 (40)                  |
| Cholesterol level was previously checked          | 29 (18)              | 7 (13)               | 22 (20)              | 13 (10)              | 16 (55)                  |
| Previously diagnosed hypercholesterolaemia        | 13 (8)               | 1 (2)                | 12 (11)              | 5 (4)                | 8 (28)                   |
| Currently taking cholesterol lowering medications | 9 (5)                | 1 (2)                | 8 (7)                | 3 (2)                | 6 (21)                   |

1  
2  
3  
4  
5  
6  
7  
8  
9  
10  
11  
12  
13  
14  
15  
16  
17  
18  
19  
20  
21  
22  
23  
24  
25  
26  
27  
28  
29  
30  
31  
32  
33  
34  
35  
36  
37  
38  
39  
40  
41  
42  
43  
44  
45  
46  
47  
48  
49

1  
2  
3  
4

Number (%) reported for all variables, except as specified b and c below

<sup>a</sup> According to report of drinking alcohol in the past 30 days

<sup>b</sup> Total energy and fat intake, which is reported as median (interquartile range)

1  
2  
3  
4  
5  
6  
7  
8  
9  
10  
11  
12  
13  
14  
15  
16  
17  
18  
19  
20  
21  
22  
23  
24  
25  
26  
27  
28  
29  
30  
31  
32  
33  
34  
35  
36  
37  
38  
39  
40  
41  
42  
43  
44  
45  
46  
47  
48  
49

- 1 <sup>c</sup> Serum total cholesterol, reported as mean (standard error)
- 2 <sup>d</sup> Hypercholesterolaemia defined as total cholesterol  $\geq$  200 mg/dL

For peer review only

1 In the minimally adjusted model (with interviewer as the only covariate), those who  
2 reported using palm oil as the major cooking oil had serum total cholesterol levels  
3 higher by 11 mg/dL (-2 to 24 mg/dL) compared with those who reported using  
4 sunflower oil (TABLE 2). After adjusting for covariates, participants who used palm oil for  
5 cooking had 15 mg/dL (1 to 29 mg/dL) higher serum total cholesterol (FIGURE 2). The  
6 negative confounding was mostly due to the negative correlation between female  
7 gender and meat intake with palm oil use (both variables were positively correlated with  
8 serum total cholesterol). Serum total cholesterol was also higher in participants who ate  
9 meat more frequently (P for trend 0.017) after adjusting for potential confounders.  
10 Specifically, those who ate more than one serving of meat per day had 18 mg/dL (-3 to  
11 39 mg/dL) higher serum total cholesterol compared with those who ate less than one  
12 serving per week. In this relationship, higher total energy intake was the major  
13 confounder with a positive correlation with meat intake but negative correlation with  
14 serum total cholesterol. Consumption of more than seven servings of fruits and  
15 vegetables per day was associated with 13 mg/dL (-29 to 3 mg/dL) lower serum total  
16 cholesterol, compared to consumption of fewer than five servings per day (P for trend  
17 0.024). A combination of using palm oil for cooking, eating more than one serving of  
18 meat per day and fewer than five servings of fruits and vegetables per day was  
19 associated with 46 mg/dL (16 to 76 mg/dL) higher serum total cholesterol.

20  
21 We found similar associations after excluding 16 participants who reported either being  
22 previously diagnosed with hypercholesterolaemia, or currently taking cholesterol  
23 lowering medications or being advised by a health professional to modify diet to lower  
24 cholesterol. Those who used palm oil had 17 mg/dL (2 to 32 mg/dL) higher serum total  
25 cholesterol compared with those who used sunflower oil (TABLE 2). There was no  
26 significant association between percent energy from saturated fat and total serum  
27 cholesterol after adjusting for total fat, total protein and total carbohydrate (Adjusted  
28 mean difference 1mg/dL (-3 to 5 mg/dL))

29  
30

1  
2  
3  
4  
5 **Table 2.** Adjusted mean differences for serum total cholesterol (mg/dL) by dietary factors; DUCS-HTN biomarker sub-study  
6  
7

| Variable                          | Interviewer-adjusted mean difference (95% CI) | P Value <sup>a</sup> | Fully-adjusted <sup>b</sup> mean difference (95% CI) (n=347) | P Value <sup>a</sup> | Fully-adjusted <sup>c</sup> mean difference after excluding 16 participants diagnosed or treated for dyslipidaemia (95% CI) (n=331) | P Value <sup>a</sup> |
|-----------------------------------|-----------------------------------------------|----------------------|--------------------------------------------------------------|----------------------|-------------------------------------------------------------------------------------------------------------------------------------|----------------------|
| <b>Major cooking oil</b>          |                                               | 0.092                |                                                              | 0.033                |                                                                                                                                     | 0.028                |
| Sunflower oil                     | Reference                                     |                      | Reference                                                    |                      | Reference                                                                                                                           |                      |
| Palm oil                          | 11 (-2, 24)                                   |                      | 15 (1, 29)                                                   |                      | 17 (2, 32)                                                                                                                          |                      |
| <b>Meat intake</b>                |                                               | 0.485                |                                                              | 0.017                |                                                                                                                                     | 0.031                |
| <1 serving/week                   | Reference                                     |                      | Reference                                                    |                      | Reference                                                                                                                           |                      |
| 1-6 servings/week                 | -1 (-19, 16)                                  |                      | -1 (-19, 17)                                                 |                      | -2 (-20, 17)                                                                                                                        |                      |
| ≥1 servings/day                   | 4 (-15, 22)                                   |                      | 18 (-3, 39)                                                  |                      | 16 (-5, 37)                                                                                                                         |                      |
| <b>Fruit and vegetable intake</b> |                                               | 0.028                |                                                              | 0.011                |                                                                                                                                     | 0.024                |
| < 5 servings/day                  | 16 (2,30)                                     |                      | 13 (-3, 29)                                                  |                      | 12 (-5, 29)                                                                                                                         |                      |
| 5-7 servings/day                  | 10 (-6, 25)                                   |                      | 8 (-8, 24)                                                   |                      | 10 (-7, 26)                                                                                                                         |                      |
| > 7 servings/day                  | Reference                                     |                      | Reference                                                    |                      | Reference                                                                                                                           |                      |
| <b>Fish intake</b>                |                                               | 0.399                |                                                              | 0.446                |                                                                                                                                     | 0.309                |
| < 1 serving/week                  | 14 (-8, 36)                                   |                      | 10 (-13, 33)                                                 |                      | 14 (-9, 38)                                                                                                                         |                      |
| 1-7 servings/week                 | 3 (-11, 17)                                   |                      | 2 (-13, 17)                                                  |                      | 4 (-11, 20)                                                                                                                         |                      |
| >1 servings/day                   | Reference                                     |                      | Reference                                                    |                      | Reference                                                                                                                           |                      |
| <b>Dairy intake</b>               |                                               | 0.802                |                                                              | 0.572                |                                                                                                                                     | 0.690                |
| < 1 serving/week                  | Reference                                     |                      | Reference                                                    |                      | Reference                                                                                                                           |                      |
| 1-6 servings/week                 | -9 (-22, 4)                                   |                      | -7 (-21, 6)                                                  |                      | -7 (-21, 7)                                                                                                                         |                      |

| Variable                                      | Interviewer-adjusted mean difference (95% CI) | P Value <sup>a</sup> | Fully-adjusted <sup>b</sup> mean difference (95% CI) (n=347) | P Value <sup>a</sup> | Fully-adjusted <sup>c</sup> mean difference after excluding 16 participants diagnosed or treated for dyslipidaemia (95% CI) (n=331) | P Value <sup>a</sup> |
|-----------------------------------------------|-----------------------------------------------|----------------------|--------------------------------------------------------------|----------------------|-------------------------------------------------------------------------------------------------------------------------------------|----------------------|
| ≥ 1 servings/day                              | -2 (-18, 15)                                  |                      | -2 (-20, 15)                                                 |                      | -1 (-20, 17)                                                                                                                        |                      |
| <b>Total energy intake</b><br>(Per 1000 kcal) | -8 (-21, 5)                                   | 0.226                | -5 (-12, 3)                                                  | 0.209                | -4 (-11, 4)                                                                                                                         | 0.365                |
| <b>Age</b>                                    |                                               | 0.106                |                                                              | 0.071                |                                                                                                                                     | 0.099                |
| 40-49                                         | Reference                                     |                      | Reference                                                    |                      | Reference                                                                                                                           |                      |
| 50-59                                         | 4 (-9, 16)                                    |                      | 6 (-6, 19)                                                   |                      | 5 (-9, 18)                                                                                                                          |                      |
| 60 and above                                  | 11 (-2, 25)                                   |                      | 16 (0, 31)                                                   |                      | 15 (-1, 31)                                                                                                                         |                      |
| <b>Sex</b>                                    |                                               | <0.001               |                                                              | <0.001               |                                                                                                                                     | <0.001               |
| Male                                          | Reference                                     |                      | Reference                                                    |                      | Reference                                                                                                                           |                      |
| Female                                        | 21 (10, 32)                                   |                      | 27 (15, 39)                                                  |                      | 24 (11, 36)                                                                                                                         |                      |
| <b>Employment status</b>                      |                                               | 0.432                |                                                              | 0.567                |                                                                                                                                     | 0.581                |
| Unemployed                                    | Reference                                     |                      | Reference                                                    |                      | Reference                                                                                                                           |                      |
| Employed <sup>d</sup>                         | -7 (-20, 6)                                   |                      | 7 (-9, 22)                                                   |                      | 5 (-12, 21)                                                                                                                         |                      |
| Retired                                       | 2 (-21, 24)                                   |                      | 12 (-13, 36)                                                 |                      | 13 (-12, 39)                                                                                                                        |                      |
| <b>Household Wealth Index</b>                 |                                               | 0.692                |                                                              | 0.754                |                                                                                                                                     | 0.952                |
| 1, Poorest                                    | Reference                                     |                      | Reference                                                    |                      | Reference                                                                                                                           |                      |
| 2                                             | -9 (-22, 4)                                   |                      | -8 (-21, 5)                                                  |                      | -7 (-20, 7)                                                                                                                         |                      |
| 3, Wealthiest                                 | -1 (-15, 12)                                  |                      | 0 (-14, 14)                                                  |                      | 2 (-13, 16)                                                                                                                         |                      |
| <b>Physical activity tertile</b>              |                                               | 0.953                |                                                              | 0.430                |                                                                                                                                     | 0.599                |
| 1, least active                               | Reference                                     |                      | Reference                                                    |                      | Reference                                                                                                                           |                      |

1  
2  
3  
4  
5  
6  
7  
8  
9  
10  
11  
12  
13  
14  
15  
16  
17  
18  
19  
20  
21  
22  
23  
24  
25  
26  
27  
28  
29  
30  
31  
32  
33  
34  
35  
36  
37  
38  
39  
40  
41  
42  
43  
44  
45  
46  
47  
48  
49

| Variable                               | Interviewer-adjusted mean difference (95% CI) | P Value <sup>a</sup> | Fully-adjusted <sup>b</sup> mean difference (95% CI) (n=347) | P Value <sup>a</sup> | Fully-adjusted <sup>c</sup> mean difference after excluding 16 participants diagnosed or treated for dyslipidaemia (95% CI) (n=331) | P Value <sup>a</sup> |
|----------------------------------------|-----------------------------------------------|----------------------|--------------------------------------------------------------|----------------------|-------------------------------------------------------------------------------------------------------------------------------------|----------------------|
| 2                                      | 1 (-13, 15)                                   |                      | 2 (-12, 16)                                                  |                      | 4 (-11, 18)                                                                                                                         |                      |
| 3, most active                         | 0 (-15, 15)                                   |                      | 7 (-9, 24)                                                   |                      | 6 (-11, 24)                                                                                                                         |                      |
| <b>Alcohol consumption<sup>e</sup></b> |                                               | 0.315                |                                                              | 0.666                |                                                                                                                                     | 0.641                |
| Non-drinker                            | Reference                                     |                      | Reference                                                    |                      | Reference                                                                                                                           |                      |
| Drinker                                | -7 (-21, 7)                                   |                      | -3 (-18, 11)                                                 |                      | -4 (-18, 11)                                                                                                                        |                      |

<sup>a</sup> F test for categorical variables (cooking oil, sex, employment status, alcohol consumption); t test for continuous variables (total energy intake); test of trend based on median value in each category for ordinal categorical variables (age category, wealth index tertile, food consumption and physical activity categories)

<sup>b</sup> Adjusted for covariates in column 1 as well as interviewer

<sup>c</sup> Excluding those previously diagnosed with hypercholesterolaemia; adjusted for covariates in column 1 as well as interviewer

<sup>d</sup> Self-employed, or government job, or job in private company

<sup>e</sup> According to report of drinking alcohol in the past 30 days

1  
2  
3  
4 1 Only 11% of women and 5% of men reported having ever had their cholesterol levels  
5 2 checked (TABLE 1; FIGURE 3). Among those with hypercholesterolaemia (n=164), 2% of  
6 3 men (1 of 54), and 11% of women (12 of 110) reported being notified by doctors about  
7 4 it, and 2% of men and 7% of women reported taking cholesterol-lowering medications.  
8  
9  
10  
11  
12  
13

## 14 6 **DISCUSSION**

15  
16 7 In this cross-sectional study among middle-aged and older adults in a peri-urban ward in  
17 8 Dar es Salaam, Tanzania, we found a high prevalence of hypercholesterolaemia. Slightly  
18 9 more than a third of men and half of women had serum total cholesterol levels greater  
19 10 than or equal to 200mg/dL. After adjusting for major confounders, serum total  
20 11 cholesterol was higher by 15 mg/dL among those who used palm oil compared to those  
21 12 who used sunflower oil as the major cooking oil, and showed a significant increasing  
22 13 trend with higher consumption of meat (P=0.017) and lower consumption of fruits and  
23 14 vegetables (P=0.01).  
24  
25  
26  
27  
28  
29  
30  
31  
32

33 16 Mean serum total cholesterol levels for men and women were similar to that reported  
34 17 in other studies conducted in other urban Tanzanian populations.[32, 39, 40] A repeated  
35 18 cross-sectional study reported an increase over time in the prevalence of  
36 19 hypercholesterolaemia in Dar es Salaam with a prevalence of 17% in 1987 versus 30% in  
37 20 1998 in men, and 7% versus 50% in women.[39] The prevalence of  
38 21 hypercholesterolaemia in our sample was higher than that reported by studies  
39 22 conducted between 2008-2014 in rural Uganda (3% men, 8% women),[9] peri-urban  
40 23 Nigeria (2% men, 6% women),[8] and blacks in urban South-Africa (25% men, 23%  
41 24 women),[41] but is lower than that reported in a study from Senegal (54% men, 61%  
42 25 women) that included both urban and rural participants.[42]  
43  
44  
45  
46  
47  
48  
49  
50  
51  
52

53  
54 27 Our estimated association between palm oil versus sunflower oil use and serum total  
55 28 cholesterol is consistent with findings from dietary observational studies and  
56 29 intervention trials. A recent meta-analysis of 30 dietary intervention trials comparing  
57  
58  
59  
60

1 diets rich in palm oil with diets rich in vegetable oils low in saturated fatty acids showed  
2 significantly higher total (13.5 mg/dL) and LDL (9.3 mg/dL) cholesterol, and slightly  
3 higher HDL cholesterol (0.8 mg/dL) 2 to 16 weeks after intervention.[21] In addition, a  
4 large case-control study conducted in Costa Rica found that palm oil use compared to  
5 soybean oil use was independently associated with 33% higher odds of myocardial  
6 infarction. [23].

7  
8 Higher meat consumption has previously been reported to be associated with higher  
9 serum total cholesterol in Tanzania.[12, 13] Similar to our finding, daily consumption of  
10 meat was found to be associated with 24 mg/dL higher serum total cholesterol levels,  
11 after adjusting for age, select dietary components and resting energy expenditure.[13]  
12 Observational studies have also reported lower LDL cholesterol by 2.3mg/dL for every  
13 additional serving of fruits or vegetables.[43-45] The magnitude of 13 mg/dL reduction  
14 in serum total cholesterol that we found for six or more servings of fruits and vegetables  
15 per day is consistent with the reductions in LDL-cholesterol seen in these studies. We  
16 did not find significant associations between serum total cholesterol and fish intake in  
17 men, as reported in previous studies. [12, 13] This could have been due to insufficient  
18 statistical power due to smaller expected effect size for fish intake or higher  
19 measurement error.

20  
21 Palm oil is obtained mostly from the middle section (pulp) of the fruits of the tropical  
22 plant *Elaeis guineensis*. [46] Compared with most other vegetable oils, it contains less  
23 unsaturated fat and more saturated fat (nearly 40 to 50% of total fat content) with the  
24 majority being palmitic acid.[46] However, compared with saturated fat from animal  
25 sources, palm oil may have a smaller impact on serum cholesterol because almost 70%  
26 of the palmitic acid is located in the first and third position of the triglycerides, which is  
27 less absorbable than those in the second position (which is the most common position  
28 of palmitic acid in animal fats). [47, 48] Despite these biological differences, evidence  
29 from both observational and experimental studies, as summarized above, points to



1  
2  
3 1 harmful effects of palm oil on serum cholesterol and CVD when substituted for  
4 2 unsaturated fatty acids.  
5  
6  
7 3

8  
9 4 Our study has several limitations. First, due to logistic and financial limitations, we  
10 5 measured serum total cholesterol instead of a full lipid panel. However, data from  
11 6 recent meta-analysis of randomized trials suggests that the effect of substituting palm  
12 7 oil for vegetable oils low in saturated fat on LDL cholesterol levels is larger than that on  
13 8 HDL.[21] Second, the assessment of diet using any method is prone to measurement  
14 9 error which may have resulted in bias. However, it is unlikely that participants with  
15 10 higher serum cholesterol differentially misreport using palm oil in cooking, limiting the  
16 11 impact of such measurement error on our results. Thirdly, the relatively small sample  
17 12 size may have resulted in insufficient statistical power to detect some associations (e.g.  
18 13 with fish intake). There are some important strengths of this study. To our knowledge,  
19 14 this is the first population-based study to report an association between using palm oil  
20 15 for cooking and serum total cholesterol in East Africa. We used a reliable point-of-care  
21 16 lipid testing system that has good clinical agreement with laboratory reference  
22 17 methods.[31] We systematically collected data on and adjusted for potential  
23 18 confounders of the association between diet and serum total cholesterol.  
24  
25  
26  
27  
28  
29  
30  
31  
32  
33  
34  
35  
36  
37  
38  
39  
40  
41  
42  
43  
44  
45  
46  
47  
48  
49  
50  
51  
52  
53  
54  
55  
56  
57  
58  
59  
60

20 Were our findings to be replicated in other studies, they could have important  
21 22 implications for nutritional policies aimed at CVD prevention. Palm oil is now the major  
23 24 edible oil in Tanzania and many other developing countries.[49] In Tanzania, more than  
25 26 half of the palm oil is imported,[50] and it is the second most imported agricultural  
27 28 commodity.[51] In our study population, more than three-quarters of participants used  
29 30 palm oil (cost 2500 Tanzanian Shillings  $\approx$  USD1.1 per litre as the major cooking oil with  
31 32 94% of participants (n=119) in the lowest tertile of wealth using palm oil. Even in the  
33 34 wealthiest tertile, only 34% (n=123) used sunflower oil (cost 4000 Tanzanian Shillings  $\approx$   
35 36 USD1.8 per litre). These socioeconomic differentials in palm oil use may affect  
37  
38  
39  
40  
41  
42  
43  
44  
45  
46  
47  
48  
49  
50  
51  
52  
53  
54  
55  
56  
57  
58  
59  
60

1 socioeonomic disparities in cardiovascular disease in the coming years with the burden  
2 shifting more swiftly to poorer households.

3  
4 Policy interventions to address composition of dietary fat have previously been  
5 implemented in Seychelles, Mauritius and Singapore.[27, 52, 53] In the early 1990s,  
6 Seychelles implemented a nationwide program that included increasing use of  
7 unsaturated vegetable oils, which may have contributed to the fairly high rate of decline  
8 in age-standardized CVD mortality of 44% in men and 28% in women over a 22-year  
9 period.[25,52,54] A national NCD prevention program was also implemented in  
10 Mauritius in the late 1980s to reduce saturated fat content of cooking oil by changing  
11 the government subsidized ration oil from palm oil to soybean oil. The observed 31  
12 mg/dL reduction in serum total cholesterol over a period of 5 years,[26, 53] is  
13 compatible with the estimated impact of replacing palm oil with unsaturated vegetable  
14 oil estimated in a recent meta-analysis of dietary intervention trials.[55] Similar policies  
15 can be considered to reduce palm oil intake in Tanzania. However, it should be noted  
16 that edible oils are viewed as necessities,[56] and increasing their price (e.g. by taxation)  
17 without providing healthier alternatives at comparable prices may have unintended  
18 adverse consequences on overall energy consumption or food security.[57-59] Reducing  
19 saturated fat in edible oil by mixing it with other unsaturated oils has been proposed as  
20 a potential intervention in Costa Rica and India,[23, 60] and could be a feasible short-  
21 term intervention in Tanzania.

22  
23 In conclusion, our results indicate that using palm oil for cooking, lower intake of fruits  
24 and vegetables and higher intake of meat is strongly associated with higher serum total  
25 cholesterol in this peri-urban population in Tanzania. Dietary policies aimed at altering  
26 these targets can be used to improve lipid profiles and therefore prevent cardiovascular  
27 diseases in Tanzania and other low-income countries with a similar dietary profile.

28

1 **CONTRIBUTORS** GD, JK, GHL and RMZ conceived and designed the study. GD obtained  
2 the funding. SSK and SF analyzed the data. GD and SSK interpreted the data and drafted  
3 the article, which was revised critically for substantive content by all authors, who  
4 approved the final version for publication. GD, SSK, SF and RMZ had full access to all of  
5 the data (including statistical reports and tables) in the study and can take responsibility  
6 for the integrity of the data and the accuracy of the data analysis. GD is the study  
7 guarantor.

#### 8 **ACKNOWLEDGEMENTS**

9 We thank participants, interviewers, data entry clerks, administrative and support staff,  
10 who generously contributed time and effort for this study, and Patrick Kazonda for  
11 meticulous data management.  
12  
13  
14

15 **FUNDING:** National Institute of Ageing through the Program on Global Demography of  
16 Ageing (PGDA 116508). SSK was supported by the Bernard Lown Scholars in  
17 Cardiovascular Health Program. RMZ was supported by an NIH T32 training grant (CA  
18 09001). The sponsors had no influence on the design and conduct of the study;  
19 collection, management, analysis, and interpretation of the data; and preparation,  
20 review, or approval of the manuscript.  
21  
22

23 **COMPETING INTERESTS:** All authors have completed the ICMJE uniform disclosure form  
24 at [www.icmje.org/coi\\_disclosure.pdf](http://www.icmje.org/coi_disclosure.pdf) (available on request from the corresponding  
25 author) and declare: no support from companies for the submitted work; no  
26 relationships with companies that might have an interest in the submitted work in the  
27 previous three years; their spouses, partners, or children have no financial relationships  
28 that may be relevant to the submitted work; no non-financial interests that may be  
29 relevant to the submitted work.  
30

1  
2  
3 1 **ETHICAL APPROVAL:** The study protocol was approved by the Institutional Review Board  
4 of the Harvard TH Chan School of Public Health and the Research and Publications  
5 Committee of Muhimbili University of Health and Allied Sciences. All participants gave  
6 informed consent.  
7  
8  
9  
10

11 5  
12 6 **DATA SHARING:** No additional data available  
13 7

14 8 **TRANSPARENCY:** The lead authors affirm that the manuscript is an honest, accurate,  
15 and transparent account of the study being reported; that no important aspects of the  
16 study have been omitted; and that any discrepancies from the study as planned have  
17 been explained.  
18  
19  
20  
21  
22

23 12  
24 13  
25 14  
26 15  
27  
28  
29  
30  
31  
32  
33  
34  
35  
36  
37  
38  
39  
40  
41  
42  
43  
44  
45  
46  
47  
48  
49  
50  
51  
52  
53  
54  
55  
56  
57  
58  
59  
60

Peer review only

1  
2  
3  
4  
5  
6  
7  
8  
9  
10  
11  
12  
13  
14  
15  
16  
17  
18  
19  
20  
21  
22  
23  
24  
25  
26  
27  
28  
29  
30  
31  
32  
33  
34  
35  
36  
37  
38  
39  
40  
41  
42  
43  
44  
45  
46  
47  
48  
49  
50  
51  
52  
53  
54  
55  
56  
57  
58  
59  
60  
  
1 REFERENCES

- 2 1. Unwin N, Setel P, Rashid S et al. Noncommunicable diseases in sub-Saharan  
3 Africa: where do they feature in the health research agenda?  
4 *Bull World Health Organ* 2001;79(10):947-53.
- 5 2. Dalal S, Beunza JJ, Volmink J et al. Non-communicable diseases in sub-Saharan  
6 Africa: what we know now. *Int J Epidemiol*. 2011;40(4):885-901.
- 7 3. Mathers CD, Loncar D. Projections of global mortality and burden of disease  
8 from 2002 to 2030 [dataset]. *Plos Med*. 2006;3(11):e442.[cited 2016 March 02].  
9 Available from:  
10 [http://www.who.int/healthinfo/global\\_burden\\_disease/projections/en/index.](http://www.who.int/healthinfo/global_burden_disease/projections/en/index.html)  
11 [html](http://www.who.int/healthinfo/global_burden_disease/projections/en/index.html). Referenced in doi: 10.1371/journal.pmed.0030442.sd002
- 12 4. Mathers CD, Stevens GA, Mascarenhas MN. Global health risks: mortality and  
13 burden of disease attributable to selected major risks. Geneva, CH: World Health  
14 Organization; 2009.70p.
- 15 5. Prospective Studies Collaboration. Blood cholesterol and vascular mortality by  
16 age, sex, and blood pressure: a meta-analysis of individual data from 61  
17 prospective studies with 55 000 vascular deaths. *Lancet*. 2007;370(9602):1829-  
18 39.
- 19 6. Farzadfar F, Finucane MM, Danaei G et al. National, regional, and global trends in  
20 serum total cholesterol since 1980: systematic analysis of health examination  
21 surveys and epidemiological studies with 321 country-years and 3.0 million  
22 participants. *Lancet*. 2011;377(9765):578-86.
- 23 7. Pessinaba S, Mbaye A, Yabeta GA et al. Prevalence and determinants of  
24 hypertension and associated cardiovascular risk factors: data from a population-  
25 based, cross-sectional survey in Saint Louis, Senegal. *Cardiovasc J Afr*.  
26 2013;24(5):180-3.
- 27 8. Oluyombo R, Olamoyegun MA, Olaifa O et al. Cardiovascular risk factors in semi-  
28 urban communities in southwest Nigeria: Patterns and prevalence. *J Epidemiol*  
29 *Glob Health*. 2015;5(2):167-74.
- 30 9. Asiki G, Murphy GA, Baisley K et al. Prevalence of dyslipidaemia and associated  
31 risk factors in a rural population in South-Western Uganda: a community based  
32 survey. *PloS One*. 2015;10(5):e0126166.

- 1  
2  
3  
4 10. Forouzanfar MH, Alexander L, Anderson HR et al. Global, regional, and national  
5 2 comparative risk assessment of 79 behavioural, environmental and occupational,  
6 3 and metabolic risks or clusters of risks in 188 countries, 1990–2013: a systematic  
7 4 analysis for the Global Burden of Disease Study 2013 [dataset]. *Lancet*.  
8 5 2015;386(10010):2287-323.[cited 2016 March 02]. Available from:  
9 6 <http://ghdx.healthdata.org/gbd-data-tool>
- 11  
12 7 11. Njelekela M, Ikeda K, Mtabaji J et al. Dietary habits, plasma polyunsaturated fatty  
13 8 acids and selected coronary disease risk factors in Tanzania. *East Afr Med J*.  
14 9 2005;82(11):572-8.
- 15  
16  
17  
18 10 12. Njelekela M, Sato T, Nara Y et al. Nutritional variation and cardiovascular risk  
19 11 factors in Tanzania--rural-urban difference. *S Afr Med J*. 2003;93(4):295-9.
- 20  
21  
22 12 13. Njelekela M, Kuga S, Nara Y et al. Prevalence of obesity and dyslipidemia in middle-  
23 13 aged men and women in Tanzania, Africa: relationship with resting energy  
24 14 expenditure and dietary factors. *J Nutr Sci Vitaminol (Tokyo)*. 2002;48(5):352-8.
- 25  
26  
27 15 14. Pauletto P, Puato M, Angeli MT et al. Blood pressure, serum lipids, and fatty acids in  
28 16 populations on a lake-fish diet or on a vegetarian diet in Tanzania. *Lipids*.  
29 17 1996;31Suppl:S309-12.
- 30  
31  
32 18 15. Marcovina SM, Kennedy H, Bon GB et al. Fish intake, independent of apo(a) size,  
33 19 accounts for lower plasma lipoprotein(a) levels in Bantu fishermen of Tanzania: The  
34 20 Lugalawa Study. *Arterioscler Thromb Vasc Biol*. 1999;19(5):1250-6.
- 35  
36  
37  
38 21 16. Asiki G, Murphy GA, Baisley K et al. Prevalence of dyslipidaemia and associated risk  
39 22 factors in a rural population in South-Western Uganda: a community based survey.  
40 23 *PLoS One*. 2015;10(5):e0126166.
- 41  
42  
43 24 17. Shaper AG, Jones KW. Serum-cholesterol, diet, and coronary heart-disease in  
44 25 Africans and Asians in Uganda. *Int J Epidemiol*. 2012;41(5):1221-5.
- 45  
46  
47 26 18. Devarajan S, Singh R, Chatterjee B et al. A blend of sesame oil and rice bran oil  
48 27 lowers blood pressure and improves the lipid profile in mild-to-moderate  
49 28 hypertensive patients. *J Clin Lipidol*. 2016;10(2):339-49.
- 50  
51  
52 29 19. Huth PJ, Fulgoni VL, Larson BT. A Systematic Review of High-Oleic Vegetable Oil  
53 30 Substitutions for Other Fats and Oils on Cardiovascular Disease Risk Factors:  
54 31 Implications for Novel High-Oleic Soybean Oils. *Adv Nutr*. 2015;6(6):674-93.
- 55  
56  
57  
58  
59  
60

- 1  
2  
3 1 20. Eyres L, Eyres MF, Chisholm A et al. Coconut oil consumption and cardiovascular  
4 risk factors in humans. *Nutr Rev.* 2016:nuw002.  
5  
6  
7 3 21. Sun Y, Neelakantan N, Wu Y et al. Palm Oil Consumption Increases LDL Cholesterol  
8 Compared with Vegetable Oils Low in Saturated Fat in a Meta-Analysis of Clinical  
9 Trials. *J Nutr.* 2015;145(7):1549-58  
10  
11  
12 6 22. Zatonski W, Campos H, Willett W. Rapid declines in coronary heart disease  
13 mortality in Eastern Europe are associated with increased consumption of oils rich  
14 in alpha-linolenic acid. *Eur J Epidemiol.* 2008;23(1):3-10.  
15  
16  
17 9 23. Kabagambe EK, Baylin A, Ascherio A et al. The type of oil used for cooking is  
18 associated with the risk of nonfatal acute myocardial infarction in Costa Rica. *J Nutr.*  
19 2005;135(11):2674-9.  
20  
21  
22  
23 12 24. Zhang J, Kesteloot H. Differences in all-cause, cardiovascular and cancer mortality  
24 between Hong Kong and Singapore: Role of nutrition. *Eur J Epidemiol.*  
25 2001;17(5):469-77.  
26  
27  
28 15 25. Bovet P, Romain S, Shamlaye C et al. Divergent fifteen-year trends in traditional and  
29 cardiometabolic risk factors of cardiovascular diseases in the Seychelles. *Cardiovasc*  
30 *Diabetol.* 2009;8(1):1.  
31  
32  
33  
34 18 26. Uusitalo U, Feskens EJ, Tuomilehto J et al. Fall in total cholesterol concentration  
35 over five years in association with changes in fatty acid composition of cooking oil  
36 in Mauritius: cross sectional survey. *BMJ.* 1996;313(7064):1044-6  
37  
38  
39 21 27. Ho O. Switching to healthier fare just got easier for eateries. The Straits Times  
40 [Internet]. Ministry of Communications and Information, Government of  
41 Singapore.2015 [cited 2016 March 23]. Available from:  
42 [https://www.gov.sg/~media/gov/files/media/20150119\\_st\\_switching\\_to\\_healthie](https://www.gov.sg/~media/gov/files/media/20150119_st_switching_to_healthier_fare_just_got_easier_for_eateries0f1c.pdf)  
43 [r\\_fare\\_just\\_got\\_easier\\_for\\_eateries0f1c.pdf](https://www.gov.sg/~media/gov/files/media/20150119_st_switching_to_healthier_fare_just_got_easier_for_eateries0f1c.pdf)  
44  
45  
46  
47 26 28. Bovet P, Shamlaye C, Gabriel A et al. Prevalence of cardiovascular risk factors in a  
48 middle-income country and estimated cost of a treatment strategy. *BMC Public*  
49 *health.* 2006;6(1):1.  
50  
51  
52 29 29. Kinabo J, Mnkeni AP, Nyaruhucha CN et al. Feeding frequency and nutrient content  
53 of foods commonly consumed in the Iringa and Morogoro regions in Tanzania. *Int J*  
54 *Food Sci Nutr.* 2006;57(1-2):9-17.  
55  
56  
57  
58  
59  
60



- 1  
2  
3 1 30. Matteucci E, Bartola LD, Rossi L et al. Improving CardioCheck PA analytical  
4 2 performance: three-year study. *Clin Chem Lab Med*. 2014;52(9):1291-6.  
5  
6  
7 3 31. dos Santos Ferreira CE, França CN, Correr CJ, Zucker ML et al. Clinical correlation  
8 4 between a point-of-care testing system and laboratory automation for lipid profile.  
9 5 *Clinica Chimica Acta*. 2015;446:263-6.  
10  
11  
12 6 32. Njelekela MA, Mpembeni R, Muhihi A et al. Gender-related differences in the  
13 7 prevalence of cardiovascular disease risk factors and their correlates in urban  
14 8 Tanzania. *BMC Cardiovasc Disord*. 2009;9:30.  
15  
16  
17 9 33. Lukmanji Z, Hertzmark E, Mlingi N et al. Tanzania food composition tables  
18 10 [Internet]. Dar es Salaam, TZ: Muhimbili University of Health and Allied Sciences;  
19 11 Tanzania Food and Nutrition Centre; Harvard School of Public Health; 2008 [cited  
20 12 2015 March 15]. Available from:  
21 13 <https://www.hsph.harvard.edu/nutritionsource/food-tables/>  
22  
23  
24  
25 14 34. World Health Organization. Obesity: Preventing and Managing the Global Epidemic.  
26 15 Report of a WHO Consultation. [Internet]. Geneva, CH: World Health Organization;  
27 16 2000 [cited 2016 March 18].253p. WHO Technical Report Series, No 894. Available  
28 17 from [http://whqlibdoc.who.int/trs/WHO\\_TRS\\_894.pdf](http://whqlibdoc.who.int/trs/WHO_TRS_894.pdf)  
29  
30  
31 18 35. World Health Organization. Prevention of Noncommunicable Diseases Department.  
32 19 Global Physical Activity Questionnaire (GPAQ) Analysis Guide [Internet]. Geneva,  
33 20 CH: World Health Organization; 2014 [cited 2014 January 07].23p. Available from:  
34 21 [http://www.who.int/chp/steps/resources/GPAQ\\_Analysis\\_Guide.pdf](http://www.who.int/chp/steps/resources/GPAQ_Analysis_Guide.pdf)  
35  
36  
37 22  
38 23 36. Filmer D, Pritchett LH. Estimating wealth effects without expenditure data—or  
39 24 tears: an application to educational enrollments in states of India. *Demography*.  
40 25 2001;38(1):115-32.  
41  
42  
43 26 37. Davis RE, Couper MP, Janz NK et al. Interviewer effects in public health surveys.  
44 27 *Health Educ Res*. 2010;25(1):14-26.  
45  
46  
47 28 38. Himelein K. Interviewer effects in subjective survey questions: evidence from  
48 29 Timor-Leste. *Int J Public Opin Res*. 2015:edv031.  
49  
50  
51 30 39. Njelekela M, Negishi H, Nara Y et al. Cardiovascular risk factors in Tanzania: a  
52 31 revisit. *Acta Trop*. 2001;79(3):231-9.  
53  
54  
55 32 40. Njelekela MA, Negishi H, Nara Y et al. Obesity and lipid profiles in middle aged men  
56 33 and women in Tanzania. *East Afr Med J*. 2002;79(2):58-64.  
57  
58  
59  
60



- 1  
2  
3 1 41. Peer N, Steyn K, Lombard C et al. Alarming rise in prevalence of atherogenic  
4 2 dyslipidaemia in the black population of Cape Town: the Cardiovascular Risk in  
5 3 Black South Africans (CRIBSA) study. *Eur J Prev Cardiol*. 2014;21(12):1549-56.  
6 4  
7 8  
8 9 42. Doupa D, Seck SM, Dia CA et al. Dyslipidemia, obesity and other cardiovascular risk  
9 5 factors in the adult population in Senegal. *Pan Afr Med J*. 2014;19:181.  
10 11  
11 12  
12 13 43. Fornés NS, Martins IS, Hernan M et al. Food frequency consumption and  
13 7 lipoproteins serum levels in the population of an urban area, Brazil. *Rev Saude  
14 8 Publica*. 2000;34(4):380-7.  
15 16  
16 17  
17 18 44. Mirmiran P, Noori N, Zavareh MB et al. Fruit and vegetable consumption and risk  
18 9 factors for cardiovascular disease. *Metabolism*. 2009;58(4):460-8.  
19 10  
20 21  
21 22 45. Djoussé L, Arnett DK, Coon H et al. Fruit and vegetable consumption and LDL  
22 12 cholesterol: the national heart, lung, and blood institute family heart study. *Am J  
23 13 Clin Nutr*. 2004;79(2):213-7.  
24 25  
25 26  
26 27  
27 28 46. Edem DO. Palm oil: Biochemical, physiological, nutritional, hematological and  
28 14 toxicological aspects: A review. *Plant Foods Hum Nutr* 2002;57(3-4):319-41.  
29 15  
30 31  
31 32 47. Zhao H, Lu Z, Bie X et al. [Analysis of positional distribution of fatty acids in  
32 16 triacylglycerols from lard by high performance liquid chromatography]. *Se pu*.  
33 17 2005;23(2):142-5.  
34 18  
35 36  
36 37 48. Hunter JE. Studies on effects of dietary fatty acids as related to their position on  
37 19 triglycerides. *Lipids*. 2001;36(7):655-68.  
38 20  
39 40  
40 41 49. Foreign Agricultural Service, United States Department of Agriculture. Oilseeds:  
41 21 World Markets and Trade [Internet]. Washington, DC: USDA; 2017 [cited 2017  
42 22 January 13]. 36 p. Available from:  
43 23 <https://apps.fas.usda.gov/psdonline/circulars/oilseeds.pdf>  
44 24  
45 46  
46 47 50. KPMG BPA Co.Ltd. Potential opportunities for investors [Internet].Tabora, TZ:  
47 25 KPMG International; 2011 [cited 2016 March 18]. 44p. Available from:  
48 26 <http://mci.ei.columbia.edu/files/2012/12/kpmg-tabora-report.pdf>  
49 27  
50 51  
51 52  
52 53 51. Tanzania Data Portal [Internet]. Dar es Salaam, TZ: Tanzania National Bureau of  
53 28 Statistics. 2014 [cited 2016 March 23]. Available from:  
54 29 [http://tanzania.opendataforafrica.org/uelwzeb/tanzania-fao-stat-water-resources-  
55 30 agriculture-production-and-trade](http://tanzania.opendataforafrica.org/uelwzeb/tanzania-fao-stat-water-resources-agriculture-production-and-trade)  
56 31  
57  
58  
59  
60

- 1  
2  
3 1 52. Bovet P, Viswanathan B, Shamlaye C et al. Addressing non-communicable diseases  
4 2 in the Seychelles: towards a comprehensive plan of action. *Glob Health Promot.*  
5 3 2010;17(2 suppl):37-40.  
6  
7  
8  
9 4 53. Dowse GK, Gareeboo H, Alberti KGM et al. Changes in population cholesterol  
10 5 concentrations and other cardiovascular risk factor levels after five years of the  
11 6 non-communicable disease intervention programme in Mauritius. *BMJ.*  
12 7 1995;311(7015):1255-9.  
13  
14  
15 8 54. Stringhini S, Sinon F, Didon J et al. Declining stroke and myocardial infarction  
16 9 mortality between 1989 and 2010 in a country of the African region. *Stroke.*  
17 10 2012;43(9):2283-8.  
18  
19  
20 11 55. Fattore E, Bosetti C, Brighenti F et al. Palm oil and blood lipid-related markers of  
21 12 cardiovascular disease: a systematic review and meta-analysis of dietary  
22 13 intervention trials. *Am J Clin Nutr.* 2014;99(6):1331-50.  
23  
24  
25  
26 14 56. Weliwita A, Nyange D, Tsujii H. Food demand patterns in Tanzania: A censored  
27 15 regression analysis of microdata. *Sri Lankan J Agric Econ.* 2011;5.  
28  
29  
30 16 57. Basu S, Babiarz KS, Ebrahim S et al. Palm oil taxes and cardiovascular disease  
31 17 mortality in India: economic-epidemiologic model. *BMJ* 2013;347:f6048.  
32  
33 18 58. Wodon QT, Tsimpo C, Backiny-Yetna P et al. Potential impact of higher food prices  
34 19 on poverty: summary estimates for a dozen west and central African countries  
35 20 [Internet]. Washington, DC: World Bank; 2008 [cited 2016 March 18]. 33p. World  
36 21 Bank Policy Research Working Paper No. 4745. Available from:  
37 22 <http://documents.worldbank.org/>  
38  
39  
40  
41 23 59. Wodon QT, Zaman H. Rising food prices in Sub-Saharan Africa: Poverty impact and  
42 24 policy responses [Internet]. Washington, DC: World Bank; 2008 [cited 2016 March  
43 25 18]. 28p. World Bank Policy Research Working Paper No. 4738. Available from:  
44 26 <http://documents.worldbank.org/>  
45  
46  
47  
48 27 60. Downs SM, Thow A-M, Ghosh-Jerath S et al. The feasibility of multisectoral policy  
49 28 options aimed at reducing trans fats and encouraging its replacement with  
50 29 healthier oils in India. *Health Policy Plan.* 2014:czu031.  
51  
52  
53  
54  
55  
56  
57  
58  
59  
60

1  
2  
3 **Figure legends**  
4

5  
6 **Figure 1.** Selection of study participants, DUCS-HTN biomarker sub-study, 2014  
7

8  
9 **Figure 2.** Association between diet and serum total cholesterol. Values were adjusted  
10 for age, sex, socioeconomic status, food consumption frequency, total energy intake,  
11 major cooking oil used, physical activity and alcohol consumption.  
12

13  
14 **Figure 3.** Diagnosis, awareness and treatment of hypercholesterolaemia in men (Part A;  
15 n=54 for all percentages) and women (Part B; n=110 for all percentages) in the DUCS-  
16 HTN biomarker sub-study, 2014.  
17  
18  
19  
20  
21  
22  
23  
24  
25  
26  
27  
28  
29  
30  
31  
32  
33  
34  
35  
36  
37  
38  
39  
40  
41  
42  
43  
44  
45  
46  
47  
48  
49  
50  
51  
52  
53  
54  
55  
56  
57  
58  
59  
60

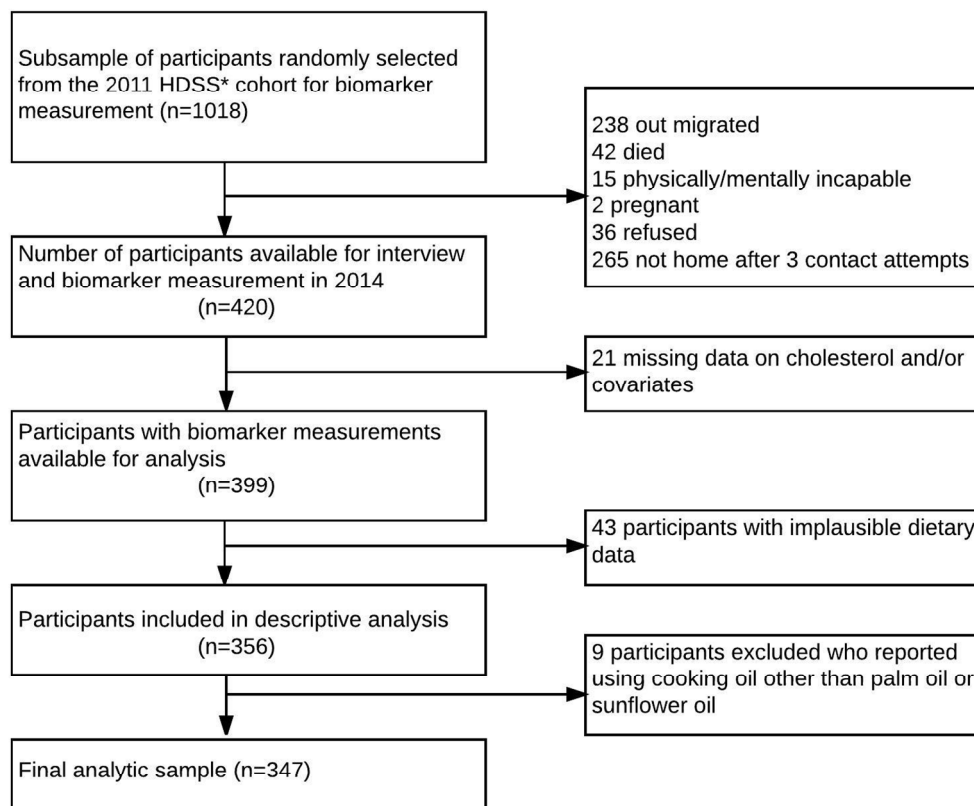

34 \*Dar Es Salaam Health and Demographic Surveillance System

36 Figure 1. Selection of study participants, DUCS-HTN biomarker sub-study, 2014

38 127x111mm (300 x 300 DPI)

40  
41  
42  
43  
44  
45  
46  
47  
48  
49  
50  
51  
52  
53  
54  
55  
56  
57  
58  
59  
60

only

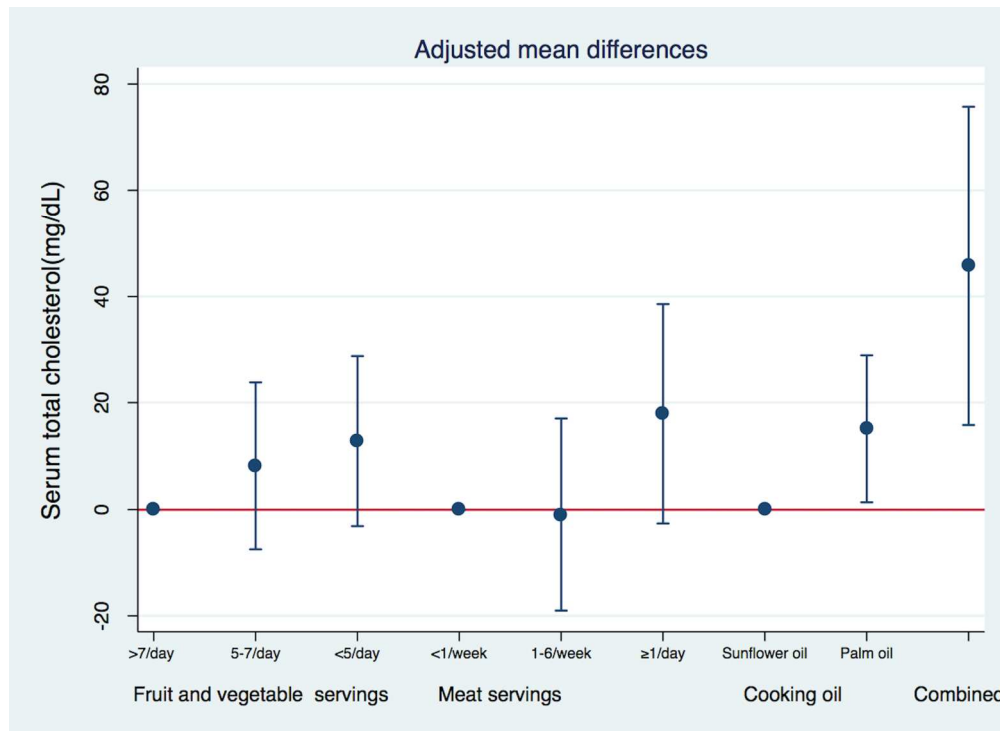

Figure 2. Association between diet and serum total cholesterol. Values were adjusted for age, sex, socioeconomic status, food consumption frequency, total energy intake, cooking oil, physical activity and alcohol consumption.

155x113mm (300 x 300 DPI)

Review Only

1  
2  
3  
4  
5  
6  
7  
8  
9  
10  
11  
12  
13  
14  
15  
16  
17  
18  
19  
20  
21  
22  
23  
24  
25  
26  
27  
28  
29  
30  
31  
32  
33  
34  
35  
36  
37  
38  
39  
40  
41  
42  
43  
44  
45  
46  
47  
48  
49  
50  
51  
52  
53  
54  
55  
56  
57  
58  
59  
60

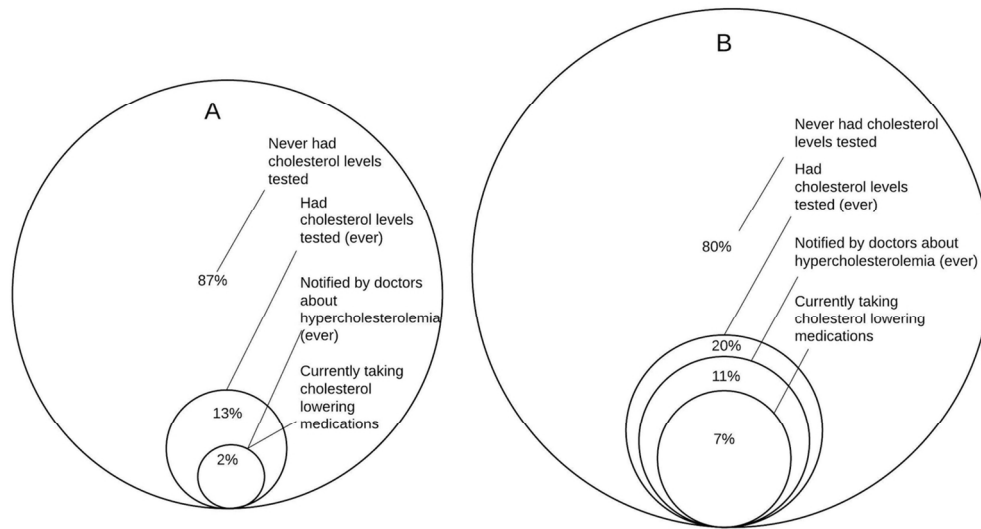

Figure 3. Diagnosis, awareness and treatment of hypercholesterolaemia in men (Part A; n=54 for all percentages) and women (Part B; n=110 for all percentages) in the DUCS-HTN biomarker sub-study, 2014.

114x60mm (300 x 300 DPI)

review only

STROBE Statement—Checklist of items that should be included in reports of *cross-sectional studies*

|                              | Item No | Recommendation                                                                                                                                                                                                                                                                                                                                                                                                                                                      |
|------------------------------|---------|---------------------------------------------------------------------------------------------------------------------------------------------------------------------------------------------------------------------------------------------------------------------------------------------------------------------------------------------------------------------------------------------------------------------------------------------------------------------|
| <b>Title and abstract</b>    | 1       | (a) Indicate the study's design with a commonly used term in the title or the abstract <a href="#">[Within the title page 1 and method section of the abstract page 2]</a><br>(b) Provide in the abstract an informative and balanced summary of what was done and what was found <a href="#">[See results section of the abstract page 2]</a>                                                                                                                      |
| <b>Introduction</b>          |         |                                                                                                                                                                                                                                                                                                                                                                                                                                                                     |
| Background/rationale         | 2       | Explain the scientific background and rationale for the investigation being reported <a href="#">[page 4]</a>                                                                                                                                                                                                                                                                                                                                                       |
| Objectives                   | 3       | State specific objectives, including any prespecified hypotheses <a href="#">[page 4]</a>                                                                                                                                                                                                                                                                                                                                                                           |
| <b>Methods</b>               |         |                                                                                                                                                                                                                                                                                                                                                                                                                                                                     |
| Study design                 | 4       | Present key elements of study design early in the paper <a href="#">[page 5]</a>                                                                                                                                                                                                                                                                                                                                                                                    |
| Setting                      | 5       | Describe the setting, locations, and relevant dates, including periods of recruitment, exposure, follow-up, and data collection <a href="#">[page 5]</a>                                                                                                                                                                                                                                                                                                            |
| Participants                 | 6       | (a) Give the eligibility criteria, and the sources and methods of selection of participants <a href="#">[page 5]</a>                                                                                                                                                                                                                                                                                                                                                |
| Variables                    | 7       | Clearly define all outcomes, exposures, predictors, potential confounders, and effect modifiers. Give diagnostic criteria, if applicable <a href="#">[page 5-6]</a>                                                                                                                                                                                                                                                                                                 |
| Data sources/<br>measurement | 8*      | For each variable of interest, give sources of data and details of methods of assessment (measurement). Describe comparability of assessment methods if there is more than one group <a href="#">[page 5-6]</a>                                                                                                                                                                                                                                                     |
| Bias                         | 9       | Describe any efforts to address potential sources of bias <a href="#">[page 6]</a>                                                                                                                                                                                                                                                                                                                                                                                  |
| Study size                   | 10      | Explain how the study size was arrived at <a href="#">[page 5]</a>                                                                                                                                                                                                                                                                                                                                                                                                  |
| Quantitative variables       | 11      | Explain how quantitative variables were handled in the analyses. If applicable, describe which groupings were chosen and why <a href="#">[page 6]</a>                                                                                                                                                                                                                                                                                                               |
| Statistical methods          | 12      | (a) Describe all statistical methods, including those used to control for confounding <a href="#">[page 6-7]</a><br>(b) Describe any methods used to examine subgroups and interactions <a href="#">[page 7]</a><br>(c) Explain how missing data were addressed <a href="#">[page 6]</a><br>(d) If applicable, describe analytical methods taking account of sampling strategy <a href="#">[N/A]</a><br>(e) Describe any sensitivity analyses <a href="#">[N/A]</a> |
| <b>Results</b>               |         |                                                                                                                                                                                                                                                                                                                                                                                                                                                                     |
| Participants                 | 13*     | (a) Report numbers of individuals at each stage of study—eg numbers potentially eligible, examined for eligibility, confirmed eligible, included in the study, completing follow-up, and analysed <a href="#">[page 7 and Figure 1]</a><br>(b) Give reasons for non-participation at each stage <a href="#">[Figure 1]</a><br>(c) Consider use of a flow diagram <a href="#">[Figure 1]</a>                                                                         |
| Descriptive data             | 14*     | (a) Give characteristics of study participants (eg demographic, clinical, social) and information on exposures and potential confounders <a href="#">[page 7]</a><br>(b) Indicate number of participants with missing data for each variable of interest <a href="#">[Figure 1]</a>                                                                                                                                                                                 |
| Outcome data                 | 15*     | Report numbers of outcome events or summary measures <a href="#">[page 7-8 and Figure 3]</a>                                                                                                                                                                                                                                                                                                                                                                        |
| Main results                 | 16      | (a) Give unadjusted estimates and, if applicable, confounder-adjusted estimates and their precision (eg, 95% confidence interval). Make clear which confounders were adjusted for and why they were included <a href="#">[page 12 and Table 2]</a>                                                                                                                                                                                                                  |

|                          |    |                                                                                                                                                                                         |
|--------------------------|----|-----------------------------------------------------------------------------------------------------------------------------------------------------------------------------------------|
|                          |    | (b) Report category boundaries when continuous variables were categorized [table 1]                                                                                                     |
|                          |    | (c) If relevant, consider translating estimates of relative risk into absolute risk for a meaningful time period [N/A]                                                                  |
| Other analyses           | 17 | Report other analyses done—eg analyses of subgroups and interactions, and sensitivity analyses [N/A]                                                                                    |
| <b>Discussion</b>        |    |                                                                                                                                                                                         |
| Key results              | 18 | Summarise key results with reference to study objectives [page 14]                                                                                                                      |
| Limitations              | 19 | Discuss limitations of the study, taking into account sources of potential bias or imprecision. Discuss both direction and magnitude of any potential bias [page 16]                    |
| Interpretation           | 20 | Give a cautious overall interpretation of results considering objectives, limitations, multiplicity of analyses, results from similar studies, and other relevant evidence [page 14,16] |
| Generalisability         | 21 | Discuss the generalisability (external validity) of the study results [page 17]                                                                                                         |
| <b>Other information</b> |    |                                                                                                                                                                                         |
| Funding                  | 22 | Give the source of funding and the role of the funders for the present study and, if applicable, for the original study on which the present article is based [page 20]                 |

\*Give information separately for exposed and unexposed groups.

**Note:** An Explanation and Elaboration article discusses each checklist item and gives methodological background and published examples of transparent reporting. The STROBE checklist is best used in conjunction with this article (freely available on the Web sites of PLoS Medicine at <http://www.plosmedicine.org/>, Annals of Internal Medicine at <http://www.annals.org/>, and Epidemiology at <http://www.epidem.com/>). Information on the STROBE Initiative is available at [www.strobe-statement.org](http://www.strobe-statement.org).



# BMJ Open

## Dietary determinants of serum total cholesterol among middle-aged and older adults: a population-based cross-sectional study in Dar es Salaam, Tanzania

|                                 |                                                                                                                                                                                                                                                                                                                                                                                                                                                                                                                                                                                                                                                                                                                                                                                                                                                                                                                                                                                                          |
|---------------------------------|----------------------------------------------------------------------------------------------------------------------------------------------------------------------------------------------------------------------------------------------------------------------------------------------------------------------------------------------------------------------------------------------------------------------------------------------------------------------------------------------------------------------------------------------------------------------------------------------------------------------------------------------------------------------------------------------------------------------------------------------------------------------------------------------------------------------------------------------------------------------------------------------------------------------------------------------------------------------------------------------------------|
| Journal:                        | <i>BMJ Open</i>                                                                                                                                                                                                                                                                                                                                                                                                                                                                                                                                                                                                                                                                                                                                                                                                                                                                                                                                                                                          |
| Manuscript ID                   | bmjopen-2016-015028.R3                                                                                                                                                                                                                                                                                                                                                                                                                                                                                                                                                                                                                                                                                                                                                                                                                                                                                                                                                                                   |
| Article Type:                   | Research                                                                                                                                                                                                                                                                                                                                                                                                                                                                                                                                                                                                                                                                                                                                                                                                                                                                                                                                                                                                 |
| Date Submitted by the Author:   | 27-Feb-2017                                                                                                                                                                                                                                                                                                                                                                                                                                                                                                                                                                                                                                                                                                                                                                                                                                                                                                                                                                                              |
| Complete List of Authors:       | Kakarmath, Sujay; Harvard T.H. Chan School of Public Health, Global Health and Population<br>Zack, Rachel; Harvard T.H. Chan School of Public Health, Epidemiology<br>Leyna, Germana; Muhimbili University of Health and Allied Sciences, Epidemiology & Biostatistics, School of Public Health<br>Fahimi, Saman; Harvard T.H. Chan School of Public Health, Global Health and Population<br>Liu, Enju; Harvard T.H. Chan School of Public Health, Global Health and Population<br>Fawzi, Wafaie; Harvard T.H. Chan School of Public Health, Global Health and Population, Epidemiology, Nutrition<br>Lukmanji, Zohra; World Food Program; Tumaini Hospital<br>Killewo, Japhet; Muhimbili University of Health and Allied Sciences, Epidemiology & Biostatistics, School of Public Health<br>Sacks, Frank; Harvard T.H. Chan School of Public Health, Nutrition, Genetics and Complex Diseases<br>Danaei, Goodarz; Harvard T.H. Chan School of Public Health, Global Health and Population, Epidemiology |
| <b>Primary Subject Heading</b>: | Nutrition and metabolism                                                                                                                                                                                                                                                                                                                                                                                                                                                                                                                                                                                                                                                                                                                                                                                                                                                                                                                                                                                 |
| Secondary Subject Heading:      | Epidemiology, Public health, Global health, Cardiovascular medicine                                                                                                                                                                                                                                                                                                                                                                                                                                                                                                                                                                                                                                                                                                                                                                                                                                                                                                                                      |
| Keywords:                       | cholesterol, palm oil, diet, Nutrition < TROPICAL MEDICINE, Tanzania, sub-Saharan Africa                                                                                                                                                                                                                                                                                                                                                                                                                                                                                                                                                                                                                                                                                                                                                                                                                                                                                                                 |
|                                 |                                                                                                                                                                                                                                                                                                                                                                                                                                                                                                                                                                                                                                                                                                                                                                                                                                                                                                                                                                                                          |

SCHOLARONE™  
Manuscripts

1  
2  
3  
4 1 **Dietary determinants of serum total cholesterol among middle-aged and older**  
5  
6 2 **adults: a population-based cross-sectional study in Dar es Salaam, Tanzania**  
7  
8 3

9  
10 4 **Authors:** Sujay Kakarmath MBBS Master's student<sup>a</sup>, Rachel M Zack MSc Doctoral  
11 5 student<sup>b</sup>, Germana H Leyna MD PhD Lecturer<sup>c</sup>, Saman Fahimi MD PhD Postdoctoral  
12 6 Research Fellow<sup>a</sup>, Enju Liu MD PhD Research Scientist<sup>a</sup>, Wafaie W Fawzi DrPH MBBS  
13 7 MPH MS Professor<sup>a,b,d</sup>, Zohra Lukmanji MSc Nutrition Consultant<sup>c</sup>, Japhet Killewo  
14 8 MBCHB DPH MSc PhD Professor<sup>c</sup>, Frank Sacks ScD MD Professor<sup>d</sup>, Goodarz Danaei  
15 9 ScD MD MS Assistant Professor<sup>a,b</sup>

16  
17  
18 10 <sup>a</sup> Department of Global Health and Population, Harvard T.H. Chan School of Public  
19 11 Health, Boston, Massachusetts, USA

20  
21  
22 12 <sup>b</sup> Department of Epidemiology, Harvard T.H. Chan School of Public Health, Boston,  
23 13 Massachusetts, USA

24  
25 14 <sup>c</sup> Department of Epidemiology and Biostatistics, School of Public Health, Muhimbili  
26 15 University of Health and Allied Sciences, Dar es Salaam, United Republic of Tanzania.

27  
28 16 <sup>d</sup> Department of Nutrition, Harvard T.H. Chan School of Public Health, Boston,  
29 17 Massachusetts, USA

30  
31 18 <sup>e</sup> World food program, Dar es Salaam and Tumaini Hospital, Dar es Salaam, Tanzania  
32  
33 19

34  
35 20 **Correspondence to:** Goodarz Danaei

36  
37 21 677 Huntington Avenue, 1107, Boston MA 02115

38  
39 22 [gdanaei@hsph.harvard.edu](mailto:gdanaei@hsph.harvard.edu)

40  
41 23 Telephone Number:+1 617 432 5722

42  
43 24 **Word count:** 3448  
44  
45 25  
46  
47 26  
48  
49 27  
50  
51 28  
52  
53  
54  
55  
56  
57  
58  
59  
60

1  
2  
3 **ABSTRACT**  
4

5  
6 **Objective:** To assess the dietary determinants of serum total cholesterol.  
7

8 **Design:** Cross-sectional population-based study.  
9

10 **Setting:** Peri-urban region of Dar es Salaam, Tanzania.  
11

12 **Participants:** 347 adults aged 40 years and older from the Dar es Salaam Urban Cohort  
13 Hypertension Study (DUCS-HTN).  
14

15 **Main outcome measure:** Serum total cholesterol measured using a point-of-care device.  
16

17 **Results:** Mean serum total cholesterol level was 204 mg/dL (Interquartile range (IQR)  
18 169 to 236 mg/dL) in women and 185 mg/dL (IQR 152 to 216 mg/dL) in men. After  
19 adjusting for demographic, socioeconomic, lifestyle and dietary factors, participants who  
20 reported using palm oil as the major cooking oil had serum total cholesterol higher by 15  
21 mg/dL (95% confidence interval 1 to 29 mg/dL) compared with those who reported using  
22 sunflower oil. Consumption of one or more servings of meat per day (P for trend= 0.017)  
23 and less than five servings of fruits and vegetables per day (P for trend= 0.024) were also  
24 associated with higher serum total cholesterol. A combination of using palm oil for  
25 cooking, eating more than one serving of meat per day and fewer than five servings of  
26 fruits and vegetables per day was associated with 46 mg/dL (95% confidence interval 16  
27 to 76 mg/dL) higher serum total cholesterol.  
28

29 **Conclusions:** Using palm oil for cooking was associated with higher serum total  
30 cholesterol levels in this peri-urban population in Dar es Salaam. Reduction of saturated  
31 fat content of edible oil may be considered as a population-based strategy for primary  
32 prevention of cardiovascular diseases.  
33

34 **Key words:** cholesterol, palm oil, diet, nutrition, Tanzania, Sub-Saharan Africa  
35  
36  
37  
38  
39  
40  
41  
42  
43  
44  
45  
46  
47  
48  
49  
50  
51  
52  
53  
54  
55  
56  
57  
58  
59  
60

1

2 **STRENGTHS AND LIMITATIONS OF THIS STUDY**

- 3 • A reliable point-of care lipid testing system was used to measure serum total
- 4 cholesterol that has good clinical agreement with laboratory reference methods.
- 5 • Potential confounders of the association between diet and serum total cholesterol were
- 6 systematically measured and adjusted for.
- 7 • Only serum total cholesterol was measured instead of a full lipid panel, due to logistic
- 8 and financial limitations.
- 9 • The relatively small sample size may have resulted in insufficient statistical power to
- 10 detect smaller associations.
- 11 • The assessment of diet using any method is prone to measurement error, which may
- 12 have resulted in bias, although differential misreporting of cooking oil by cholesterol
- 13 level is unlikely.

14

15

## 1 INTRODUCTION

2  
3  
4  
5  
6  
7 Sub-Saharan Africa is facing a burgeoning epidemic of non-communicable diseases  
8 (NCDs) due to changing demographic profiles, epidemiologic transition, urbanization,  
9 and lifestyle changes as a result of economic development as well as increasing survival  
10 of HIV patients.[1, 2] In 2015, one third of all estimated NCD deaths in sub-Saharan  
11 Africa were due to cardiovascular diseases (CVD).[3] By 2030, the share of all deaths  
12 attributable to CVD is projected to increase by nearly 40% in this region.[3]

13  
14  
15  
16  
17  
18  
19  
20  
21  
22  
23  
24  
25  
26  
27  
28  
29  
30  
31  
32  
33  
34  
35  
36  
37  
38  
39  
40  
41  
42  
43  
44  
45  
46  
47  
48  
49  
50  
51  
52  
53  
54  
55  
56  
57  
58  
59  
60  
9  
10  
11  
12  
13  
14  
15  
16  
17  
18  
19  
20  
21  
22  
23  
24  
25  
26  
27  
28  
29  
30  
31  
32  
33  
34  
35  
36  
37  
38  
39  
40  
41  
42  
43  
44  
45  
46  
47  
48  
49  
50  
51  
52  
53  
54  
55  
56  
57  
58  
59  
60  
Dyslipidaemia is a well-known risk factor for ischemic heart disease (IHD), stroke, and  
other vascular diseases.[4, 5] In middle-aged adults, IHD mortality is lower by as much  
as 30 to 50% for every 1 mmol/L (38.6mg/dL) lower serum total cholesterol.[5] Sub-  
Saharan Africans have historically had a favorable lipid profile [6] but hyperlipidaemia is  
becoming increasingly common in these countries, especially in urban areas.[7-9] It is  
estimated that thirty-four percent of ischemic heart disease deaths in Tanzania are  
attributable to dyslipidaemia.[10]

16  
17  
18  
19  
20  
21  
22  
23  
24  
25  
26  
27  
28  
29  
A few studies have already explored the relationship between diet and serum total  
cholesterol in eastern sub-Saharan Africa and reported an association between higher  
intake of meat and lower intake of fish and green vegetables with higher serum total  
cholesterol. [11-15] However, two of these studies compared rural and coastal Bantu  
populations that are known to have, respectively, vegetarian and fish-based diets and did  
not measure diet in each participant and based their conclusions on known dietary  
differences between ethnic populations. [14, 15] Another study included participants  
from rural, urban and pastoral regions of Tanzania but did not report the magnitude of the  
association[12] The other two studies conducted in urban Tanzania did not adjust for  
potential confounders of the relationship between diet and serum total cholesterol.[11,  
13] There are a few studies from other parts of sub-Saharan Africa that have looked at the  
association between diet and serum cholesterol. A study conducted in a rural population  
in Uganda found that eating fewer than 5 servings of fruits and vegetables daily was  
associated with higher odds of low HDL cholesterol among men, but lower odds among

1 women.[16] Another study in urban Uganda found lower mean serum total cholesterol in  
2 lacto-ovo-vegetarians compared to non-vegetarians.[17]

3  
4 Another potential dietary determinant of serum cholesterol is the type of oil used in  
5 cooking.[18,19] Using cooking oils with higher saturated fat content such as coconut and  
6 palm oil has been associated with higher serum total cholesterol levels in clinical trials  
7 and observational studies.[20, 21] Population-level differences in CVD morbidity and  
8 mortality is associated with differences in type of cooking oil in eastern European,[22]  
9 Costa Rica,[23] and Singapore.[24] Mauritius, Seychelles and Singapore have already  
10 implemented policy schemes to reduce saturated fat content of cooking oil as population-  
11 level interventions to reduce burden of CVD.[25-27]

12 A thorough understanding of the role of dietary determinants of serum cholesterol will be  
13 invaluable in designing population-level interventions to address the growing CVD  
14 burden especially considering that treatment for dyslipidaemia is either unavailable or  
15 prohibitively expensive for most patients in low-income countries.[28] Tanzanian diet  
16 consists predominantly of carbohydrates (mainly maize, sweet potatoes, cassava and rice)  
17 consumed with green leafy vegetables, beans or peas and occasionally with meat or  
18 fish.[29] Palm oil is the major cooking oil, followed by sunflower oil.

19 We conducted a cross-sectional population-based study to assess the association of type  
20 of cooking oil (palm vs sunflower oil) and diet (meat, fish, fruit and vegetable  
21 consumption) with serum total cholesterol in an adult population in a peri-urban area of  
22 Dar es Salaam. We hypothesized that use of palm oil for cooking and higher intake of  
23 meat and lower intake of fruits and vegetables will be associated with higher serum total  
24 cholesterol.

25

## 1 METHODS

### 2 Study design and population

3 The Dar es Salaam Health and Demographic Surveillance System (HDSS) is a  
4 demographic surveillance system in Ukonga and Gongo la Mboti wards of Dar es  
5 Salaam, Tanzania with over 100,000 enumerated individuals living in 21,000 households  
6 followed since 2011/12. For the Dar es Salaam Urban Cohort Hypertension Study  
7 (DUCS-HTN), we randomly selected one large and one small neighborhood in the HDSS  
8 and contacted all adult residents aged 40 years and older, who had been registered in the  
9 HDSS database in 2011 or 2012. A random subsample of one-fifth of the eligible  
10 participants was selected for additional assessment of diet and measurement of serum  
11 total cholesterol. The size of this subsample was determined largely based upon the  
12 availability of resources. Pregnant women and those who were physically and mentally  
13 incapable of completing the interview and measurements were excluded. The participant  
14 selection flowchart is shown in Figure 1. Face-to-face interviews and measurements were  
15 conducted in participant's home from March to June 2014 by six trained interviewers. All  
16 interviewers had previous experience conducting public health surveys. For this study,  
17 interviewers received five days of training and two days of field practice in a nearby  
18 neighborhood. At least three attempts were made to contact all potential participants.  
19 Written informed consent was obtained from all participants.

20 The study protocol was approved by the Institutional Review Board of the Harvard TH  
21 Chan School of Public Health and the Research and Publications Committee of  
22 Muhimbili University of Health and Allied Sciences.

### 23 Measurements

24 Non-fasting serum total cholesterol was measured from 30 micro-liters of finger-prick  
25 capillary blood samples using Cardiochek PA devices (Polymer Technology Systems Inc,  
26 IN, USA).[30, 31] The overall coefficient of variation for this device for total cholesterol  
27 has been determined to be in the range of 1.3 to 2.9%.[30]

28 Data on diet was collected using a semi-quantitative food frequency questionnaire (FFQ).  
29 The FFQ assessed intake of 179 food and drink items over the past 30 days. A shorter 85-

1  
2  
3 1 item version of this instrument has been previously used in Tanzania.[32] Nutrient  
4  
5 2 intakes were calculated by multiplying the frequency of food consumption measured  
6  
7 3 from FFQ by the nutrient content of the specified portion size using the Tanzanian food  
8  
9 4 composition table.[33] Meat intake was defined to include all red and white meat  
10  
11 5 consumption, excluding fish consumption. Fruit and vegetable intake was defined to  
12  
13 6 include consumption of all fruits and vegetables, except for root vegetables and fruit  
14  
15 7 juice. An additional question was asked to assess the main type of cooking oil: “What is  
16  
17 8 the kind of oil used most often in your home for frying food?”. Frying is the most  
18  
19 9 common cooking technique involving oil use in this region. The reference to a cooking  
20  
21 10 technique was made to distinguish it from other oils that may be used in a household,  
22  
23 11 such as fuels.

24  
25 12 All participants completed a socioeconomic, demographic and lifestyle questionnaire and  
26  
27 13 had their height, weight, waist circumference, hip circumference, and blood pressure  
28  
29 14 measured by trained interviewers. Some demographic information (age, sex,  
30  
31 15 neighborhood, components of wealth index) was taken from the HDSS baseline  
32  
33 16 interview. Body mass index was calculated as weight (kg) divided by height (m) squared,  
34  
35 17 and categorized as underweight (<18.5), normal (18.5 to <25.0), overweight (25.0 to  
36  
37 18 <30.0), and obese ( $\geq 30.0$ ).[34] Physical activity was assessed using the Global Physical  
38  
39 19 Activity Questionnaire in the domains of work, transportation, and leisure,[35] and  
40  
41 20 categorized into tertiles of Metabolic Equivalent (MET) hours per week. To measure  
42  
43 21 socioeconomic status, we created a household wealth index using a principal component  
44  
45 22 analysis of household characteristics (floor material, roof material, wall material,  
46  
47 23 electricity), household assets (television, radio, shop, sewing machine, sofa, fan, iron,  
48  
49 24 stove with oven, stove without oven, dining table, cupboard, watch, mobile phone, bike,  
50  
51 25 motorcycle, cart, car, motorboat), and animal ownership (goats, sheep, chicken/ducks,  
52  
53 26 pigs).[36] The household wealth index was categorized into tertiles.

54  
55  
56  
57  
58  
59  
60  
27

## 28 **Statistical analysis**



1 We excluded participants with implausible dietary data (total energy intake <500 or  
2 >5000 kcal/day), and with missing data on serum total cholesterol, diet and/or any of the  
3 potential covariates.

4 Chi-square tests were used to assess binary variables, F-tests were used for categorical  
5 variables and tests of linear trend based on median value within each category for ordinal  
6 variables with a linear association with serum total cholesterol (i.e. age, wealth index, and  
7 food consumption categories). Mean differences and 95% confidence intervals in serum  
8 total cholesterol across categories of dietary factors, including cooking oil were estimated  
9 using multivariable linear regression. Potential confounders were included in the model  
10 based on a-priori knowledge of lifestyle and socio-demographic determinants of diet and  
11 serum total cholesterol. The fully adjusted model included age, sex, total energy intake,  
12 physical activity, alcohol consumption, wealth index and employment status as  
13 covariates. We also adjusted for interviewer to remove the effect of any extraneous  
14 variation in measurement of subjective risk factors across interviewers. [37, 38] We  
15 examined interactions of potential determinants of serum total cholesterol with sex, but  
16 no interactions were statistically significant at 0.2 level, therefore we did not include  
17 these product terms in the final model. We conducted sensitivity analyses by excluding  
18 16 participants who reported either being previously diagnosed with  
19 hypercholesterolaemia, or currently taking cholesterol-lowering medications or being  
20 advised by a health professional to modify diet to lower cholesterol.

21 All analyses were performed using STATA software version 13.1 (STATA Corporation,  
22 College Station, Texas).

23

1  
2  
3 1  
4 2 **RESULTS**

5 3 A total of 420 participants were enrolled for the random subsample with diet and  
6 4 cholesterol measurements. Among these, data on serum total cholesterol and selected  
7 5 covariates was available for 399 participants. We excluded 43 participants due to  
8 6 implausible caloric intake. In addition, after descriptive analyses we excluded 9 (2%)  
9 7 participants who reported using cooking oils other than palm or sunflower oil. The final  
10 8 analytic sample included 347 participants (FIGURE 1).

11 9 Forty-two percent of the participants (n=347) were men (TABLE 1). Mean age of men  
12 10 was 55 years (SD 11), and that of women was 52 (SD 10). 44% of the women (n=202)  
13 11 and 19% of men (n=145) were obese, and one third of men and women were overweight.  
14 12 Mean energy intake per day was 2413 kcal. Thirty-seven percent of men and 54% of  
15 13 women were hypercholesterolemic (i.e. had total cholesterol  $\geq 200$  mg/dL). Mean serum  
16 14 total cholesterol in women was 204 mg/dL (95% confidence interval 197 to 211 mg/dL)  
17 15 and was significantly higher than that of men at 185 mg/dL (177 to 193 mg/dL). Serum  
18 16 total cholesterol levels were higher in older age groups.

19 17 79% of participants reported using palm oil as the major cooking oil and the rest reported  
20 18 using sunflower oil (TABLE 1). Those who reported using palm oil were most likely to  
21 19 be in the poorest tertile of wealth, whereas those who reported using sunflower oil were  
22 20 most likely to be in the wealthiest tertile ( $p < 0.001$ ). Those who reported using sunflower  
23 21 oil had a higher energy intake ( $p = 0.04$ ), and reported consuming meat ( $p = 0.004$ ) and  
24 22 dairy ( $p = 0.02$ ) more frequently than those who reported using palm oil. Mean serum total  
25 23 cholesterol in those who reported using palm oil was 199 mg/dL (193 to 205) and was  
26 24 significantly higher than those who reported using sunflower oil 184 mg/dL (173 to 195).

1 **Table 1.** Participants' characteristics in DUCS-HTN biomarker sub-study, 2014

| Variable                               | All (n=347) | Men (n=145) | Women (n=202) | Use palm oil (n=274) | Use sunflower oil (n=73) |
|----------------------------------------|-------------|-------------|---------------|----------------------|--------------------------|
| <b>Age</b>                             |             |             |               |                      |                          |
| 40-49                                  | 150 (43)    | 56 (39)     | 94 (47)       | 123 (45)             | 27 (37)                  |
| 50-59                                  | 113 (33)    | 43 (30)     | 70 (35)       | 82 (30)              | 31 (42)                  |
| 60 and above                           | 84 (24)     | 46 (32)     | 38 (19)       | 69 (25)              | 15 (21)                  |
| <b>Employment status</b>               |             |             |               |                      |                          |
| Unemployed                             | 83 (24)     | 14 (10)     | 69 (34)       | 70 (26)              | 13 (18)                  |
| Employed (includes self-               | 238 (69)    | 112 (77)    | 126 (62)      | 183 (67)             | 55 (75)                  |
| Retired                                | 26 (7)      | 19 (13)     | 7 (3)         | 21 (8)               | 5 (7)                    |
| <b>Household wealth index</b>          |             |             |               |                      |                          |
| Tertile 1, Poorest                     | 115 (33)    | 49 (34)     | 66 (33)       | 109 (40)             | 6 (8)                    |
| Tertile 2                              | 117 (34)    | 53 (37)     | 64 (32)       | 90 (33)              | 27 (37)                  |
| Tertile 3, Wealthiest                  | 115 (33)    | 43 (30)     | 72 (36)       | 75 (27)              | 40 (55)                  |
| <b>BMI (kg/m<sup>2</sup>)</b>          |             |             |               |                      |                          |
| Underweight (<18.50)                   | 19 (5)      | 13 (9)      | 6 (3)         | 19 (7)               | 0 (0)                    |
| Normal weight (18.50-<25.00)           | 100 (29)    | 56 (39)     | 44 (22)       | 91 (33)              | 9 (12)                   |
| Overweight (25-<30.00)                 | 112 (32)    | 48 (33)     | 64 (32)       | 81 (30)              | 31 (42)                  |
| Obese (≥ 30.00)                        | 116 (33)    | 28 (19)     | 88 (44)       | 83 (30)              | 33 (45)                  |
| <b>Physical activity</b>               |             |             |               |                      |                          |
| Tertile 1,<br>(0-14 MET-hours/week)    | 123 (35)    | 46 (32)     | 77 (38)       | 96 (35)              | 27 (37)                  |
| Tertile 2,<br>(15-112 MET-hours/week)  | 108 (31)    | 38 (27)     | 70 (35)       | 86 (31)              | 22 (30)                  |
| Tertile 3,<br>(113-840 MET-hours/week) | 116 (33)    | 61 (42)     | 55 (27)       | 92 (34)              | 24 (33)                  |
| <b>Alcohol drinking<sup>a</sup></b>    |             |             |               |                      |                          |

| Variable                             | All (n=347) | Men (n=145) | Women (n=202) | Use palm oil (n=274) | Use sunflower oil (n=73) |
|--------------------------------------|-------------|-------------|---------------|----------------------|--------------------------|
| Non-drinker                          | 286 (82)    | 103 (71)    | 183 (91)      | 225 (82)             | 61 (84)                  |
| <b>Smoking</b>                       |             |             |               |                      |                          |
| Non-smoker                           | 278 (81)    | 85 (59)     | 193 (97)      | 210 (78)             | 68 (93)                  |
| Former smoker                        | 43 (13)     | 39 (27)     | 4 (2)         | 38 (14)              | 5 (7)                    |
| Current smoker                       | 22 (6)      | 19 (13)     | 3 (2)         | 22 (8)               | 0 (0)                    |
| <b>DIETARY VARIABLES</b>             |             |             |               |                      |                          |
| <b>Palm oil as major cooking oil</b> | 274 (79)    | 119 (82)    | 155 (77)      |                      |                          |
| <b>Meat intake</b>                   |             |             |               |                      |                          |
| <1 serving/week                      | 41 (12)     | 21 (14)     | 20 (10)       | 36 (13)              | 5 (7)                    |
| 1-6 servings/week                    | 173 (50)    | 55 (38)     | 118 (58)      | 145 (53)             | 28 (38)                  |
| ≥1 servings/day                      | 133 (38)    | 69 (48)     | 64 (32)       | 93 (34)              | 40 (55)                  |
| <b>Fish intake</b>                   |             |             |               |                      |                          |
| < 1 serving/week                     | 41 (12)     | 13 (9)      | 28 (14)       | 31 (11)              | 10 (14)                  |
| 1-7 servings/week                    | 196 (56)    | 76 (52)     | 120 (59)      | 154 (56)             | 42 (58)                  |
| > 1 servings/day                     | 110 (32)    | 56 (39)     | 54 (27)       | 89 (32)              | 21 (29)                  |
| <b>Dairy intake</b>                  |             |             |               |                      |                          |
| < 1 serving/week                     | 159 (46)    | 63 (43)     | 96 (48)       | 136 (50)             | 23 (32)                  |
| 1-6 servings/week                    | 133 (38)    | 65 (45)     | 68 (34)       | 99 (36)              | 34 (47)                  |
| ≥ 1 servings/day                     | 55 (16)     | 17 (12)     | 38 (19)       | 39 (14)              | 16 (22)                  |
| <b>Fruit and vegetable</b>           |             |             |               |                      |                          |
| < 5 servings/day                     | 121 (35)    | 49 (34)     | 72 (36)       | 101 (37)             | 20 (27)                  |
| 5-7 servings/day                     | 68 (20)     | 26 (20)     | 42 (21)       | 54 (20)              | 14 (19)                  |
| >7 servings/day                      | 158 (46)    | 70 (48)     | 88 (44)       | 119 (43)             | 39 (53)                  |

| Variable                                          | All (n=347)          | Men (n=145)          | Women (n=202)        | Use palm oil (n=274) | Use sunflower oil (n=73) |
|---------------------------------------------------|----------------------|----------------------|----------------------|----------------------|--------------------------|
| <b>Nuts and legumes</b>                           |                      |                      |                      |                      |                          |
| < 1 serving/week                                  | 27 (8)               | 7 (5)                | 20 (10)              | 17 (6)               | 10 (14)                  |
| 1-7 servings/week                                 | 200 (58)             | 87 (60)              | 113 (56)             | 162 (59)             | 38 (52)                  |
| > 1 servings/day                                  | 120 (35)             | 51 (35)              | 69 (34)              | 95 (35)              | 25 (34)                  |
| <b>Total energy intake (kcal/day)<sup>b</sup></b> | 2413<br>(1701, 3215) | 2629<br>(1780, 3216) | 2313<br>(1617, 3207) | 2369<br>(1654, 3150) | 2743<br>(1865, 3606)     |
| <b>Fat intake<sup>b</sup></b>                     |                      |                      |                      |                      |                          |
| Total fat (% of energy)                           | 17 (15, 20)          | 17 (15, 21)          | 17 (15, 20)          | 17 (14, 20)          | 20 (15, 22)              |
| Saturated fat (% energy)                          | 10 (8, 13)           | 10 (8, 13)           | 10 (8, 12)           | 10 (8, 13)           | 10 (8, 11)               |
| Monounsaturated fat (% of energy)                 | 4 (3, 5)             | 4 (3, 5)             | 4 (3, 5)             | 4 (3, 5)             | 4 (4, 5)                 |
| Polyunsaturated fat (% of energy)                 | 2 (1, 2)             | 2 (1, 2)             | 2 (1, 2)             | 1 (1, 2)             | 2 (1, 2)                 |
| <b>Cholesterol</b>                                |                      |                      |                      |                      |                          |
| Serum total cholesterol (mg/dl) <sup>c</sup>      | 196 (3)              | 185 (4)              | 204 (4)              | 199 (3)              | 184 (6)                  |
| Hypercholesterolaemia <sup>d</sup>                | 164 (47)             | 54 (37)              | 110 (54)             | 135 (49)             | 29 (40)                  |
| Cholesterol level was previously checked          | 29 (18)              | 7 (13)               | 22 (20)              | 13 (10)              | 16 (55)                  |
| Previously diagnosed hypercholesterolaemia        | 13 (8)               | 1 (2)                | 12 (11)              | 5 (4)                | 8 (28)                   |
| Currently taking cholesterol lowering medications | 9 (5)                | 1 (2)                | 8 (7)                | 3 (2)                | 6 (21)                   |

Number (%) reported for all variables, except as specified b and c below

<sup>a</sup> According to report of drinking alcohol in the past 30 days

<sup>b</sup> Total energy and fat intake, which is reported as median (interquartile range)

<sup>c</sup> Serum total cholesterol, reported as mean (standard error)

1  
2  
3  
4  
5  
6  
7  
8  
9  
10  
11  
12  
13  
14  
15  
16  
17  
18  
19  
20  
21  
22  
23  
24  
25  
26  
27  
28  
29  
30  
31  
32  
33  
34  
35  
36  
37  
38  
39  
40  
41  
42  
43  
44  
45  
46  
47  
48  
49

1 <sup>d</sup> Hypercholesterolaemia defined as total cholesterol  $\geq$  200 mg/dL

For peer review only

1  
2  
3  
4 1 In the minimally adjusted model (with interviewer as the only covariate), those who  
5 2 reported using palm oil as the major cooking oil had serum total cholesterol levels higher  
6 3 by 11 mg/dL (-2 to 24 mg/dL) compared with those who reported using sunflower oil  
7 4 (TABLE 2). After adjusting for covariates, participants who used palm oil for cooking  
8 5 had 15 mg/dL (1 to 29 mg/dL) higher serum total cholesterol (FIGURE 2). The negative  
9 6 confounding was mostly due to the negative correlation between female gender and meat  
10 7 intake with palm oil use (both variables were positively correlated with serum total  
11 8 cholesterol). Serum total cholesterol was also higher in participants who ate meat more  
12 9 frequently (P for trend 0.017) after adjusting for potential confounders. Specifically,  
13 10 those who ate more than one serving of meat per day had 18 mg/dL (-3 to 39 mg/dL)  
14 11 higher serum total cholesterol compared with those who ate less than one serving per  
15 12 week. In this relationship, higher total energy intake was the major confounder with a  
16 13 positive correlation with meat intake but negative correlation with serum total  
17 14 cholesterol. Consumption of more than seven servings of fruits and vegetables per day  
18 15 was associated with 13 mg/dL (-29 to 3 mg/dL) lower serum total cholesterol, compared  
19 16 to consumption of fewer than five servings per day (P for trend 0.024). A combination of  
20 17 using palm oil for cooking, eating more than one serving of meat per day and fewer than  
21 18 five servings of fruits and vegetables per day was associated with 46 mg/dL (16 to 76  
22 19 mg/dL) higher serum total cholesterol.

23  
24  
25  
26  
27  
28  
29  
30  
31  
32  
33  
34  
35  
36  
37  
38  
39 21 We found similar associations after excluding 16 participants who reported either being  
40 22 previously diagnosed with hypercholesterolaemia, or currently taking cholesterol  
41 23 lowering medications or being advised by a health professional to modify diet to lower  
42 24 cholesterol. Those who used palm oil had 17 mg/dL (2 to 32 mg/dL) higher serum total  
43 25 cholesterol compared with those who used sunflower oil (TABLE 2). There was no  
44 26 significant association between percent energy from saturated fat and total serum  
45 27 cholesterol after adjusting for total fat, total protein and total carbohydrate (Adjusted  
46 28 mean difference 1mg/dL (-3 to 5 mg/dL))

47  
48  
49  
50  
51  
52  
53  
54  
55  
56  
57  
58  
59  
60

1  
2  
3  
4  
5 **Table 2.** Adjusted mean differences for serum total cholesterol (mg/dL) by dietary factors; DUCS-HTN biomarker sub-study  
6  
7

| Variable                          | Interviewer-adjusted mean difference (95% CI) | P Value <sup>a</sup> | Fully-adjusted <sup>b</sup> mean difference (95% CI) (n=347) | P Value <sup>a</sup> | Fully-adjusted <sup>c</sup> mean difference after excluding 16 participants diagnosed or treated for dyslipidaemia (95% CI) (n=331) | P Value <sup>a</sup> |
|-----------------------------------|-----------------------------------------------|----------------------|--------------------------------------------------------------|----------------------|-------------------------------------------------------------------------------------------------------------------------------------|----------------------|
| <b>Major cooking oil</b>          |                                               | 0.092                |                                                              | 0.033                |                                                                                                                                     | 0.028                |
| Sunflower oil                     | Reference                                     |                      | Reference                                                    |                      | Reference                                                                                                                           |                      |
| Palm oil                          | 11 (-2, 24)                                   |                      | 15 (1, 29)                                                   |                      | 17 (2, 32)                                                                                                                          |                      |
| <b>Meat intake</b>                |                                               | 0.485                |                                                              | 0.017                |                                                                                                                                     | 0.031                |
| <1 serving/week                   | Reference                                     |                      | Reference                                                    |                      | Reference                                                                                                                           |                      |
| 1-6 servings/week                 | -1 (-19, 16)                                  |                      | -1 (-19, 17)                                                 |                      | -2 (-20, 17)                                                                                                                        |                      |
| ≥1 servings/day                   | 4 (-15, 22)                                   |                      | 18 (-3, 39)                                                  |                      | 16 (-5, 37)                                                                                                                         |                      |
| <b>Fruit and vegetable intake</b> |                                               | 0.028                |                                                              | 0.011                |                                                                                                                                     | 0.024                |
| < 5 servings/day                  | 16 (2,30)                                     |                      | 13 (-3, 29)                                                  |                      | 12 (-5, 29)                                                                                                                         |                      |
| 5-7 servings/day                  | 10 (-6, 25)                                   |                      | 8 (-8, 24)                                                   |                      | 10 (-7, 26)                                                                                                                         |                      |
| > 7 servings/day                  | Reference                                     |                      | Reference                                                    |                      | Reference                                                                                                                           |                      |
| <b>Fish intake</b>                |                                               | 0.399                |                                                              | 0.446                |                                                                                                                                     | 0.309                |
| < 1 serving/week                  | 14 (-8, 36)                                   |                      | 10 (-13, 33)                                                 |                      | 14 (-9, 38)                                                                                                                         |                      |
| 1-7 servings/week                 | 3 (-11, 17)                                   |                      | 2 (-13, 17)                                                  |                      | 4 (-11, 20)                                                                                                                         |                      |
| >1 servings/day                   | Reference                                     |                      | Reference                                                    |                      | Reference                                                                                                                           |                      |
| <b>Dairy intake</b>               |                                               | 0.802                |                                                              | 0.572                |                                                                                                                                     | 0.690                |
| < 1 serving/week                  | Reference                                     |                      | Reference                                                    |                      | Reference                                                                                                                           |                      |
| 1-6 servings/week                 | -9 (-22, 4)                                   |                      | -7 (-21, 6)                                                  |                      | -7 (-21, 7)                                                                                                                         |                      |
| ≥ 1 servings/day                  | -2 (-18, 15)                                  |                      | -2 (-20, 15)                                                 |                      | -1 (-20, 17)                                                                                                                        |                      |



| Variable                                      | Interviewer-adjusted mean difference (95% CI) | P Value <sup>a</sup> | Fully-adjusted <sup>b</sup> mean difference (95% CI) (n=347) | P Value <sup>a</sup> | Fully-adjusted <sup>c</sup> mean difference after excluding 16 participants diagnosed or treated for dyslipidaemia (95% CI) (n=331) | P Value <sup>a</sup> |
|-----------------------------------------------|-----------------------------------------------|----------------------|--------------------------------------------------------------|----------------------|-------------------------------------------------------------------------------------------------------------------------------------|----------------------|
| <b>Total energy intake</b><br>(Per 1000 kcal) | -8 (-21, 5)                                   | 0.226                | -5 (-12, 3)                                                  | 0.209                | -4 (-11, 4)                                                                                                                         | 0.365                |
| <b>Age</b>                                    |                                               | 0.106                |                                                              | 0.071                |                                                                                                                                     | 0.099                |
| 40-49                                         | Reference                                     |                      | Reference                                                    |                      | Reference                                                                                                                           |                      |
| 50-59                                         | 4 (-9, 16)                                    |                      | 6 (-6, 19)                                                   |                      | 5 (-9, 18)                                                                                                                          |                      |
| 60 and above                                  | 11 (-2, 25)                                   |                      | 16 (0, 31)                                                   |                      | 15 (-1, 31)                                                                                                                         |                      |
| <b>Sex</b>                                    |                                               | <0.001               |                                                              | <0.001               |                                                                                                                                     | <0.001               |
| Male                                          | Reference                                     |                      | Reference                                                    |                      | Reference                                                                                                                           |                      |
| Female                                        | 21 (10, 32)                                   |                      | 27 (15, 39)                                                  |                      | 24 (11, 36)                                                                                                                         |                      |
| <b>Employment status</b>                      |                                               | 0.432                |                                                              | 0.567                |                                                                                                                                     | 0.581                |
| Unemployed                                    | Reference                                     |                      | Reference                                                    |                      | Reference                                                                                                                           |                      |
| Employed <sup>d</sup>                         | -7 (-20, 6)                                   |                      | 7 (-9, 22)                                                   |                      | 5 (-12, 21)                                                                                                                         |                      |
| Retired                                       | 2 (-21, 24)                                   |                      | 12 (-13, 36)                                                 |                      | 13 (-12, 39)                                                                                                                        |                      |
| <b>Household Wealth Index</b>                 |                                               | 0.692                |                                                              | 0.754                |                                                                                                                                     | 0.952                |
| 1, Poorest                                    | Reference                                     |                      | Reference                                                    |                      | Reference                                                                                                                           |                      |
| 2                                             | -9 (-22, 4)                                   |                      | -8 (-21, 5)                                                  |                      | -7 (-20, 7)                                                                                                                         |                      |
| 3, Wealthiest                                 | -1 (-15, 12)                                  |                      | 0 (-14, 14)                                                  |                      | 2 (-13, 16)                                                                                                                         |                      |
| <b>Physical activity tertile</b>              |                                               | 0.953                |                                                              | 0.430                |                                                                                                                                     | 0.599                |
| 1, least active                               | Reference                                     |                      | Reference                                                    |                      | Reference                                                                                                                           |                      |
| 2                                             | 1 (-13, 15)                                   |                      | 2 (-12, 16)                                                  |                      | 4 (-11, 18)                                                                                                                         |                      |
| 3, most active                                | 0 (-15, 15)                                   |                      | 7 (-9, 24)                                                   |                      | 6 (-11, 24)                                                                                                                         |                      |

1  
2  
3  
4  
5  
6  
7  
8  
9  
10  
11  
12  
13  
14  
15  
16  
17  
18  
19  
20  
21  
22  
23  
24  
25  
26  
27  
28  
29  
30  
31  
32  
33  
34  
35  
36  
37  
38  
39  
40  
41  
42  
43  
44  
45  
46  
47  
48  
49

| Variable                               | Interviewer-adjusted mean difference (95% CI) | P Value <sup>a</sup> | Fully-adjusted <sup>b</sup> mean difference (95% CI) (n=347) | P Value <sup>a</sup> | Fully-adjusted <sup>c</sup> mean difference after excluding 16 participants diagnosed or treated for dyslipidaemia (95% CI) (n=331) | P Value <sup>a</sup> |
|----------------------------------------|-----------------------------------------------|----------------------|--------------------------------------------------------------|----------------------|-------------------------------------------------------------------------------------------------------------------------------------|----------------------|
| <b>Alcohol consumption<sup>e</sup></b> |                                               | 0.315                |                                                              | 0.666                |                                                                                                                                     | 0.641                |
| Non-drinker                            | Reference                                     |                      | Reference                                                    |                      | Reference                                                                                                                           |                      |
| Drinker                                | -7 (-21, 7)                                   |                      | -3 (-18, 11)                                                 |                      | -4 (-18, 11)                                                                                                                        |                      |

<sup>a</sup>  $\chi^2$  test for categorical variables (cooking oil, sex, employment status, alcohol consumption); t test for continuous variables (total energy intake); test of trend based on median value in each category for ordinal categorical variables (age category, wealth index tertile, food consumption and physical activity categories)

<sup>b</sup> Adjusted for covariates in column 1 as well as interviewer

<sup>c</sup> Excluding those previously diagnosed with hypercholesterolaemia; adjusted for covariates in column 1 as well as interviewer

<sup>d</sup> Self-employed, or government job, or job in private company

<sup>e</sup> According to report of drinking alcohol in the past 30 days

1 Only 11% of women and 5% of men reported having ever had their cholesterol levels  
2 checked (TABLE 1; FIGURE 3). Among those with hypercholesterolaemia (n=164), 2%  
3 of men (1 of 54), and 11% of women (12 of 110) reported being notified by doctors about  
4 it, and 2% of men and 7% of women reported taking cholesterol-lowering medications.

## 6 DISCUSSION

7 In this cross-sectional study among middle-aged and older adults in a peri-urban ward in  
8 Dar es Salaam, Tanzania, we found a high prevalence of hypercholesterolaemia. Slightly  
9 more than a third of men and half of women had serum total cholesterol levels greater  
10 than or equal to 200mg/dL. After adjusting for major confounders, serum total cholesterol  
11 was higher by 15 mg/dL among those who used palm oil compared to those who used  
12 sunflower oil as the major cooking oil, and showed a significant increasing trend with  
13 higher consumption of meat (P=0.017) and lower consumption of fruits and vegetables  
14 (P=0.01).

15  
16 Mean serum total cholesterol levels for men and women were similar to that reported in  
17 other studies conducted in other urban Tanzanian populations.[32, 39, 40] A repeated  
18 cross-sectional study reported an increase over time in the prevalence of  
19 hypercholesterolaemia in Dar es Salaam with a prevalence of 17% in 1987 versus 30% in  
20 1998 in men, and 7% versus 50% in women.[39] The prevalence of  
21 hypercholesterolaemia in our sample was higher than that reported by studies conducted  
22 between 2008-2014 in rural Uganda (3% men, 8% women),[9] peri-urban Nigeria (2%  
23 men, 6% women),[8] and blacks in urban South-Africa (25% men, 23% women),[41] but  
24 is lower than that reported in a study from Senegal (54% men, 61% women) that included  
25 both urban and rural participants.[42]

26  
27 Our estimated association between palm oil versus sunflower oil use and serum total  
28 cholesterol is consistent with findings from dietary observational studies and intervention  
29 trials. A recent meta-analysis of 30 dietary intervention trials comparing diets rich in  
30 palm oil with diets rich in vegetable oils low in saturated fatty acids showed significantly

1  
2  
3 1 higher total (13.5 mg/dL) and LDL (9.3 mg/dL) cholesterol, and slightly higher HDL  
4 2 cholesterol (0.8 mg/dL) 2 to 16 weeks after intervention.[21] In addition, a large case-  
5 3 control study conducted in Costa Rica found that palm oil use compared to soybean oil  
6 4 use was independently associated with 33% higher odds of myocardial infarction. [23].  
7  
8  
9

10  
11  
12 6 Higher meat consumption has previously been reported to be associated with higher  
13 7 serum total cholesterol in Tanzania.[12, 13] Similar to our finding, daily consumption of  
14 8 meat was found to be associated with 24 mg/dL higher serum total cholesterol levels,  
15 9 after adjusting for age, select dietary components and resting energy expenditure.[13]  
16 10 Observational studies have also reported lower LDL cholesterol by 2.3mg/dL for every  
17 11 additional serving of fruits or vegetables.[43-45] The magnitude of 13 mg/dL reduction  
18 12 in serum total cholesterol that we found for six or more servings of fruits and vegetables  
19 13 per day is consistent with the reductions in LDL-cholesterol seen in these studies. We did  
20 14 not find significant associations between serum total cholesterol and fish intake in men,  
21 15 as reported in previous studies. [12, 13] This could have been due to insufficient  
22 16 statistical power due to smaller expected effect size for fish intake or higher measurement  
23 17 error.  
24  
25  
26  
27  
28  
29  
30  
31  
32  
33

34  
35 19 Palm oil is obtained mostly from the middle section (pulp) of the fruits of the tropical  
36 20 plant *Elaeis guineensis*. [46] Compared with most other vegetable oils, it contains less  
37 21 unsaturated fat and more saturated fat (nearly 40 to 50% of total fat content) with the  
38 22 majority being palmitic acid.[46] However, compared with saturated fat from animal  
39 23 sources, palm oil may have a smaller impact on serum cholesterol because almost 70% of  
40 24 the palmitic acid is located in the first and third position of the triglycerides, which is less  
41 25 absorbable than those in the second position (which is the most common position of  
42 26 palmitic acid in animal fats). [47, 48] Despite these biological differences, evidence from  
43 27 both observational and experimental studies, as summarized above, points to harmful  
44 28 effects of palm oil on serum cholesterol and CVD when substituted for unsaturated fatty  
45 29 acids.  
46  
47  
48  
49  
50  
51  
52  
53  
54  
55

56  
57  
58  
59  
60  
30

1  
2  
3 1 Our study has several limitations. First, due to logistic and financial limitations, we  
4 2 measured serum total cholesterol instead of a full lipid panel. However, data from recent  
5 3 meta-analysis of randomized trials suggests that the effect of substituting palm oil for  
6 4 vegetable oils low in saturated fat on LDL cholesterol levels is larger than that on  
7 5 HDL.[21] Second, the assessment of diet using any method is prone to measurement  
8 6 error which may have resulted in bias. However, it is unlikely that participants with  
9 7 higher serum cholesterol differentially misreport using palm oil in cooking, limiting the  
10 8 impact of such measurement error on our results. Thirdly, the relatively small sample size  
11 9 may have resulted in insufficient statistical power to detect some associations (e.g. with  
12 10 fish intake). There are some important strengths of this study. To our knowledge, this is  
13 11 the first population-based study to report an association between using palm oil for  
14 12 cooking and serum total cholesterol in East Africa. We used a reliable point-of-care lipid  
15 13 testing system that has good clinical agreement with laboratory reference methods.[31]  
16 14 We systematically collected data on and adjusted for potential confounders of the  
17 15 association between diet and serum total cholesterol.

18  
19 17 Were our findings to be replicated in other studies, they could have important  
20 18 implications for nutritional policies aimed at CVD prevention. Palm oil is now the major  
21 19 edible oil in Tanzania and many other developing countries.[49] In Tanzania, more than  
22 20 half of the palm oil is imported,[50] and it is the second most imported agricultural  
23 21 commodity.[51] In our study population, more than three-quarters of participants used  
24 22 palm oil (cost 2500 Tanzanian Shillings  $\approx$  USD1.1 per litre as the major cooking oil with  
25 23 94% of participants (n=119) in the lowest tertile of wealth using palm oil. Even in the  
26 24 wealthiest tertile, only 34% (n=123) used sunflower oil (cost 4000 Tanzanian Shillings  $\approx$   
27 25 USD1.8 per litre). These socioeconomic differentials in palm oil use may affect  
28 26 socioeconomic disparities in cardiovascular disease in the coming years with the burden  
29 27 shifting more swiftly to poorer households.

30  
31 29 Policy interventions to address composition of dietary fat have previously been  
32 30 implemented in Seychelles, Mauritius and Singapore.[27, 52, 53] In the early 1990s,  
33 31 Seychelles implemented a nationwide program that included increasing use of

1  
2  
3 1 unsaturated vegetable oils, which may have contributed to the fairly high rate of decline  
4 in age-standardized CVD mortality of 44% in men and 28% in women over a 22-year  
5 period.[25,52,54] A national NCD prevention program was also implemented in  
6 Mauritius in the late 1980s to reduce saturated fat content of cooking oil by changing the  
7 government subsidized ration oil from palm oil to soybean oil. The observed 31 mg/dL  
8 reduction in serum total cholesterol over a period of 5 years,[26, 53] is compatible with  
9 the estimated impact of replacing palm oil with unsaturated vegetable oil estimated in a  
10 recent meta-analysis of dietary intervention trials.[55] Similar policies can be considered  
11 to reduce palm oil intake in Tanzania. However, it should be noted that edible oils are  
12 viewed as necessities,[56] and increasing their price (e.g. by taxation) without providing  
13 healthier alternatives at comparable prices may have unintended adverse consequences on  
14 overall energy consumption or food security.[57-59] Reducing saturated fat in edible oil  
15 by mixing it with other unsaturated oils has been proposed as a potential intervention in  
16 Costa Rica and India,[23, 60] and could be a feasible short-term intervention in Tanzania.

16 In conclusion, our results indicate that using palm oil for cooking, lower intake of fruits  
17 and vegetables and higher intake of meat is strongly associated with higher serum total  
18 cholesterol in this peri-urban population in Tanzania. Our findings are generalisable to  
19 other peri-urban populations in Tanzania and possibly to populations in low-income  
20 countries with a similar dietary profile. Dietary policies aimed at altering the targets  
21 identified in this study can be used to improve lipid profiles and therefore prevent  
22 cardiovascular diseases in these countries.

1 **CONTRIBUTORS** GD, JK, GHJ and RMZ conceived and designed the study. GD  
2 obtained the funding. SSK and SF analyzed the data. GD and SSK interpreted the data  
3 and drafted the article, which was revised critically for substantive content by all authors,  
4 who approved the final version for publication. GD, SSK, SF and RMZ had full access to  
5 all of the data (including statistical reports and tables) in the study and can take  
6 responsibility for the integrity of the data and the accuracy of the data analysis. GD is the  
7 study guarantor.

## 8 **ACKNOWLEDGEMENTS**

9 We thank participants, interviewers, data entry clerks, administrative and support staff,  
10 who generously contributed time and effort for this study, and Patrick Kazonda for  
11 meticulous data management.  
12  
13  
14

15  
16 **FUNDING:** National Institute of Ageing through the Program on Global Demography of  
17 Ageing (PGDA 116508). SSK was supported by the Bernard Lown Scholars in  
18 Cardiovascular Health Program. RMZ was supported by an NIH T32 training grant (CA  
19 09001). The sponsors had no influence on the design and conduct of the study; collection,  
20 management, analysis, and interpretation of the data; and preparation, review, or approval  
21 of the manuscript.  
22

23 **COMPETING INTERESTS:** All authors have completed the ICMJE uniform  
24 disclosure form at [www.icmje.org/coi\\_disclosure.pdf](http://www.icmje.org/coi_disclosure.pdf) (available on request from the  
25 corresponding author) and declare: no support from companies for the submitted work;  
26 no relationships with companies that might have an interest in the submitted work in the  
27 previous three years; their spouses, partners, or children have no financial relationships  
28 that may be relevant to the submitted work; no non-financial interests that may be  
29 relevant to the submitted work.  
30

31 **ETHICAL APPROVAL:** The study protocol was approved by the Institutional Review  
32 Board of the Harvard TH Chan School of Public Health and the Research and  
33

1  
2  
3 1 Publications Committee of Muhimbili University of Health and Allied Sciences. All  
4  
5 2 participants gave informed consent.  
6

7 3  
8 4 **DATA SHARING:** No additional data available  
9 5

10 6 **TRANSPARENCY:** The lead authors affirm that the manuscript is an honest, accurate,  
11 7 and transparent account of the study being reported; that no important aspects of the  
12 8 study have been omitted; and that any discrepancies from the study as planned have been  
13 9 explained.  
14  
15  
16  
17

18 10  
19 11  
20 12  
21 13  
22  
23  
24  
25  
26  
27  
28  
29  
30  
31  
32  
33  
34  
35  
36  
37  
38  
39  
40  
41  
42  
43  
44  
45  
46  
47  
48  
49  
50  
51  
52  
53  
54  
55  
56  
57  
58  
59  
60



1  
2  
3  
4  
5  
6  
7  
8  
9  
10  
11  
12  
13  
14  
15  
16  
17  
18  
19  
20  
21  
22  
23  
24  
25  
26  
27  
28  
29  
30  
31  
32  
33  
34  
35  
36  
37  
38  
39  
40  
41  
42  
43  
44  
45  
46  
47  
48  
49  
50  
51  
52  
53  
54  
55  
56  
57  
58  
59  
60  

## 1 REFERENCES

- 2 1. Unwin N, Setel P, Rashid S et al. Noncommunicable diseases in sub-Saharan  
3 Africa: where do they feature in the health research agenda?  
4 *Bull World Health Organ* 2001;79(10):947-53.
- 5 2. Dalal S, Beunza JJ, Volmink J et al. Non-communicable diseases in sub-Saharan  
6 Africa: what we know now. *Int J Epidemiol*. 2011;40(4):885-901.
- 7 3. Mathers CD, Loncar D. Projections of global mortality and burden of disease  
8 from 2002 to 2030 [dataset]. *Plos Med*. 2006;3(11):e442.[cited 2016 March 02].  
9 Available from:  
10 [http://www.who.int/healthinfo/global\\_burden\\_disease/projections/en/index.html](http://www.who.int/healthinfo/global_burden_disease/projections/en/index.html).  
11 Referenced in doi: 10.1371/journal.pmed.0030442.sd002
- 12 4. Mathers CD, Stevens GA, Mascarenhas MN. Global health risks: mortality and  
13 burden of disease attributable to selected major risks. Geneva, CH: World Health  
14 Organization; 2009.70p.
- 15 5. Prospective Studies Collaboration. Blood cholesterol and vascular mortality by  
16 age, sex, and blood pressure: a meta-analysis of individual data from 61  
17 prospective studies with 55 000 vascular deaths. *Lancet*. 2007;370(9602):1829-39.
- 18 6. Farzadfar F, Finucane MM, Danaei G et al. National, regional, and global trends  
19 in serum total cholesterol since 1980: systematic analysis of health examination  
20 surveys and epidemiological studies with 321 country-years and 3·0 million  
21 participants. *Lancet*. 2011;377(9765):578-86.
- 22 7. Pessinaba S, Mbaye A, Yabeta GA et al. Prevalence and determinants of  
23 hypertension and associated cardiovascular risk factors: data from a population-  
24 based, cross-sectional survey in Saint Louis, Senegal. *Cardiovasc J Afr*.  
25 2013;24(5):180-3.
- 26 8. Oluyombo R, Olamoyegun MA, Olaifa O et al. Cardiovascular risk factors in  
27 semi-urban communities in southwest Nigeria: Patterns and prevalence. *J*  
28 *Epidemiol Glob Health*. 2015;5(2):167-74.
- 29 9. Asiki G, Murphy GA, Baisley K et al. Prevalence of dyslipidaemia and associated  
30 risk factors in a rural population in South-Western Uganda: a community based  
31 survey. *PloS One*. 2015;10(5):e0126166.
- 32 10. Forouzanfar MH, Alexander L, Anderson HR et al. Global, regional, and national  
33 comparative risk assessment of 79 behavioural, environmental and occupational, and  
34 metabolic risks or clusters of risks in 188 countries, 1990–2013: a systematic

- 1  
2  
3 1 analysis for the Global Burden of Disease Study 2013 [dataset]. *Lancet*.  
4 2 2015;386(10010):2287-323.[cited 2016 March 02]. Available from:  
5 3 <http://ghdx.healthdata.org/gbd-data-tool>  
6  
7  
8  
9 4 11. Njelekela M, Ikeda K, Mtabaji J et al. Dietary habits, plasma polyunsaturated fatty  
10 5 acids and selected coronary disease risk factors in Tanzania. *East Afr Med J*.  
11 6 2005;82(11):572-8.
- 12  
13  
14 7 12. Njelekela M, Sato T, Nara Y et al. Nutritional variation and cardiovascular risk  
15 8 factors in Tanzania--rural-urban difference. *S Afr Med J*. 2003;93(4):295-9.
- 16  
17  
18 9 13. Njelekela M, Kuga S, Nara Y et al. Prevalence of obesity and dyslipidemia in  
19 10 middle-aged men and women in Tanzania, Africa: relationship with resting energy  
20 11 expenditure and dietary factors. *J Nutr Sci Vitaminol (Tokyo)*. 2002;48(5):352-8.
- 21  
22  
23 12 14. Pauletto P, Puato M, Angeli MT et al. Blood pressure, serum lipids, and fatty acids  
24 13 in populations on a lake-fish diet or on a vegetarian diet in Tanzania. *Lipids*.  
25 14 1996;31Suppl:S309-12.
- 26  
27  
28 15 15. Marcovina SM, Kennedy H, Bon GB et al. Fish intake, independent of apo(a) size,  
29 16 accounts for lower plasma lipoprotein(a) levels in Bantu fishermen of Tanzania: The  
30 17 Lugalawa Study. *Arterioscler Thromb Vasc Biol*. 1999;19(5):1250-6.
- 31  
32  
33 18 16. Asiki G, Murphy GA, Baisley K et al. Prevalence of dyslipidaemia and associated  
34 19 risk factors in a rural population in South-Western Uganda: a community based  
35 20 survey. *PloS One*. 2015;10(5):e0126166.
- 36  
37  
38 21 17. Shaper AG, Jones KW. Serum-cholesterol, diet, and coronary heart-disease in  
39 22 Africans and Asians in Uganda. *Int J Epidemiol*. 2012;41(5):1221-5.
- 40  
41  
42 23 18. Devarajan S, Singh R, Chatterjee B et al. A blend of sesame oil and rice bran oil  
43 24 lowers blood pressure and improves the lipid profile in mild-to-moderate  
44 25 hypertensive patients. *J Clin Lipidol*. 2016;10(2):339-49.
- 46  
47 26 19. Huth PJ, Fulgoni VL, Larson BT. A Systematic Review of High-Oleic Vegetable Oil  
48 27 Substitutions for Other Fats and Oils on Cardiovascular Disease Risk Factors:  
49 28 Implications for Novel High-Oleic Soybean Oils. *Adv Nutr*. 2015;6(6):674-93.
- 50  
51  
52 29 20. Eyres L, Eyres MF, Chisholm A et al. Coconut oil consumption and cardiovascular  
53 30 risk factors in humans. *Nutr Rev*. 2016:nuw002.
- 54  
55  
56  
57  
58  
59  
60

- 1  
2  
3 1 21. Sun Y, Neelakantan N, Wu Y et al. Palm Oil Consumption Increases LDL  
4 Cholesterol Compared with Vegetable Oils Low in Saturated Fat in a Meta-Analysis  
5 of Clinical Trials. *J Nutr.* 2015;145(7):1549-58  
6  
7  
8  
9 4 22. Zatonski W, Campos H, Willett W. Rapid declines in coronary heart disease  
10 mortality in Eastern Europe are associated with increased consumption of oils rich in  
11 alpha-linolenic acid. *Eur J Epidemiol.* 2008;23(1):3-10.  
12  
13  
14 7 23. Kabagambe EK, Baylin A, Ascherio A et al. The type of oil used for cooking is  
15 associated with the risk of nonfatal acute myocardial infarction in Costa Rica. *J*  
16 *Nutr.* 2005;135(11):2674-9.  
17  
18  
19 10 24. Zhang J, Kesteloot H. Differences in all-cause, cardiovascular and cancer mortality  
20 between Hong Kong and Singapore: Role of nutrition. *Eur J Epidemiol.*  
21 2001;17(5):469-77.  
22  
23  
24 13 25. Bovet P, Romain S, Shamlaye C et al. Divergent fifteen-year trends in traditional  
25 and cardiometabolic risk factors of cardiovascular diseases in the Seychelles.  
26 *Cardiovasc Diabetol.* 2009;8(1):1.  
27  
28  
29 16 26. Uusitalo U, Feskens EJ, Tuomilehto J et al. Fall in total cholesterol concentration  
30 over five years in association with changes in fatty acid composition of cooking oil  
31 in Mauritius: cross sectional survey. *BMJ.* 1996;313(7064):1044-6  
32  
33  
34 19 27. Ho O. Switching to healthier fare just got easier for eateries. The Straits Times  
35 [Internet]. Ministry of Communications and Information, Government of  
36 Singapore.2015 [cited 2016 March 23]. Available from:  
37 [https://www.gov.sg/~media/gov/files/media/20150119\\_st\\_switching\\_to\\_healthier\\_f](https://www.gov.sg/~media/gov/files/media/20150119_st_switching_to_healthier_fare_just_got_easier_for_eateries0f1c.pdf)  
38 [are\\_just\\_got\\_easier\\_for\\_eateries0f1c.pdf](https://www.gov.sg/~media/gov/files/media/20150119_st_switching_to_healthier_fare_just_got_easier_for_eateries0f1c.pdf)  
39  
40  
41 24 28. Bovet P, Shamlaye C, Gabriel A et al. Prevalence of cardiovascular risk factors in a  
42 middle-income country and estimated cost of a treatment strategy. *BMC Public*  
43 *health.* 2006;6(1):1.  
44  
45  
46 27 29. Kinabo J, Mnkeni AP, Nyaruhucha CN et al. Feeding frequency and nutrient content  
47 of foods commonly consumed in the Iringa and Morogoro regions in Tanzania. *Int J*  
48 *Food Sci Nutr.* 2006;57(1-2):9-17.  
49  
50  
51 30 30. Matteucci E, Bartola LD, Rossi L et al. Improving CardioCheck PA analytical  
52 performance: three-year study. *Clin Chem Lab Med.* 2014;52(9):1291-6.  
53  
54  
55  
56  
57  
58  
59  
60

- 1  
2  
3 1 31. dos Santos Ferreira CE, França CN, Correr CJ, Zucker ML et al. Clinical correlation  
4 2 between a point-of-care testing system and laboratory automation for lipid profile.  
5 3 *Clinica Chimica Acta*. 2015;446:263-6.  
6  
7  
8 4 32. Njelekela MA, Mpembeni R, Muhihi A et al. Gender-related differences in the  
9 5 prevalence of cardiovascular disease risk factors and their correlates in urban  
10 6 Tanzania. *BMC Cardiovasc Disord*. 2009;9:30.  
11  
12  
13 7 33. Lukmanji Z, Hertzmark E, Mlingi N et al. Tanzania food composition tables  
14 8 [Internet]. Dar es Salaam, TZ: Muhimbili University of Health and Allied Sciences;  
15 9 Tanzania Food and Nutrition Centre; Harvard School of Public Health; 2008 [cited  
16 10 2015 March 15]. Available from:  
17 11 <https://www.hsph.harvard.edu/nutritionsource/food-tables/>  
18  
19  
20  
21 12 34. World Health Organization. Obesity: Preventing and Managing the Global  
22 13 Epidemic. Report of a WHO Consultation. [Internet]. Geneva, CH: World Health  
23 14 Organization; 2000 [cited 2016 March 18].253p. WHO Technical Report Series, No  
24 15 894. Available from [http://whqlibdoc.who.int/trs/WHO\\_TRS\\_894.pdf](http://whqlibdoc.who.int/trs/WHO_TRS_894.pdf)  
25  
26  
27 16 35. World Health Organization. Prevention of Noncommunicable Diseases Department.  
28 17 Global Physical Activity Questionnaire (GPAQ) Analysis Guide [Internet]. Geneva,  
29 18 CH: World Health Organization; 2014 [cited 2014 January 07].23p. Available from:  
30 19 [http://www.who.int/chp/steps/resources/GPAQ\\_Analysis\\_Guide.pdf](http://www.who.int/chp/steps/resources/GPAQ_Analysis_Guide.pdf)  
31  
32  
33 20  
34 21 36. Filmer D, Pritchett LH. Estimating wealth effects without expenditure data—or  
35 22 tears: an application to educational enrollments in states of India. *Demography*.  
36 23 2001;38(1):115-32.  
37  
38 24 37. Davis RE, Couper MP, Janz NK et al. Interviewer effects in public health surveys.  
39 25 *Health Educ Res*. 2010;25(1):14-26.  
40  
41  
42 26 38. Himelein K. Interviewer effects in subjective survey questions: evidence from  
43 27 Timor-Leste. *Int J Public Opin Res*. 2015:edv031.  
44  
45  
46 28 39. Njelekela M, Negishi H, Nara Y et al. Cardiovascular risk factors in Tanzania: a  
47 29 revisit. *Acta Trop*. 2001;79(3):231-9.  
48  
49  
50 30 40. Njelekela MA, Negishi H, Nara Y et al. Obesity and lipid profiles in middle aged  
51 31 men and women in Tanzania. *East Afr Med J*. 2002;79(2):58-64.  
52  
53  
54 32 41. Peer N, Steyn K, Lombard C et al. Alarming rise in prevalence of atherogenic  
55 33 dyslipidaemia in the black population of Cape Town: the Cardiovascular Risk in  
56 34 Black South Africans (CRIBSA) study. *Eur J Prev Cardiol*. 2014;21(12):1549-56.  
57  
58  
59  
60

- 1  
2  
3 42. Doupa D, Seck SM, Dia CA et al. Dyslipidemia, obesity and other cardiovascular  
4 risk factors in the adult population in Senegal. *Pan Afr Med J.* 2014;19:181.  
5  
6  
7 43. Fornés NS, Martins IS, Hernan M et al. Food frequency consumption and  
8 lipoproteins serum levels in the population of an urban area, Brazil. *Rev Saude*  
9 *Publica.* 2000;34(4):380-7.  
10  
11  
12 44. Mirmiran P, Noori N, Zavareh MB et al. Fruit and vegetable consumption and risk  
13 factors for cardiovascular disease. *Metabolism.* 2009;58(4):460-8.  
14  
15  
16 45. Djoussé L, Arnett DK, Coon H et al. Fruit and vegetable consumption and LDL  
17 cholesterol: the national heart, lung, and blood institute family heart study. *Am J Clin*  
18 *Nutr.* 2004;79(2):213-7.  
19  
20  
21 46. Edem DO. Palm oil: Biochemical, physiological, nutritional, hematological and  
22 toxicological aspects: A review. *Plant Foods Hum Nutr* 2002;57(3-4):319-41.  
23  
24  
25 47. Zhao H, Lu Z, Bie X et al. [Analysis of positional distribution of fatty acids in  
26 triacylglycerols from lard by high performance liquid chromatography]. *Se pu.*  
27 2005;23(2):142-5.  
28  
29  
30 48. Hunter JE. Studies on effects of dietary fatty acids as related to their position on  
31 triglycerides. *Lipids.* 2001;36(7):655-68.  
32  
33  
34 49. Foreign Agricultural Service, United States Department of Agriculture. Oilseeds:  
35 World Markets and Trade [Internet]. Washington, DC: USDA; 2017 [cited 2017  
36 January 13]. 36 p. Available from:  
37 <http://apps.fas.usda.gov/psdonline/circulars/oilseeds.pdf>  
38  
39  
40 50. KPMG BPA Co.Ltd. Potential opportunities for investors [Internet]. Tabora, TZ:  
41 KPMG International; 2011 [cited 2016 March 18]. 44p. Available from:  
42 <http://mci.ei.columbia.edu/files/2012/12/kpmg-tabora-report.pdf>  
43  
44  
45 51. Tanzania Data Portal [Internet]. Dar es Salaam, TZ: Tanzania National Bureau of  
46 Statistics. 2014 [cited 2016 March 23]. Available from:  
47 [http://tanzania.opendataforafrica.org/uclwzeb/tanzania-fao-stat-water-resources-](http://tanzania.opendataforafrica.org/uclwzeb/tanzania-fao-stat-water-resources-agriculture-production-and-trade)  
48 [agriculture-production-and-trade](http://tanzania.opendataforafrica.org/uclwzeb/tanzania-fao-stat-water-resources-agriculture-production-and-trade)  
49  
50  
51  
52 52. Bovet P, Viswanathan B, Shamlaye C et al. Addressing non-communicable diseases  
53 in the Seychelles: towards a comprehensive plan of action. *Glob Health Promot.*  
54 2010;17(2 suppl):37-40.  
55  
56  
57  
58  
59  
60

- 1  
2  
3 1 53. Dowse GK, Gareeboo H, Alberti KGM et al. Changes in population cholesterol  
4 2 concentrations and other cardiovascular risk factor levels after five years of the non-  
5 3 communicable disease intervention programme in Mauritius. *BMJ*.  
6 4 1995;311(7015):1255-9.  
7  
8  
9  
10 5 54. Stringhini S, Sinon F, Didon J et al. Declining stroke and myocardial infarction  
11 6 mortality between 1989 and 2010 in a country of the African region. *Stroke*.  
12 7 2012;43(9):2283-8.  
13  
14  
15 8 55. Fattore E, Bosetti C, Brighenti F et al. Palm oil and blood lipid-related markers of  
16 9 cardiovascular disease: a systematic review and meta-analysis of dietary intervention  
17 10 trials. *Am J Clin Nutr*. 2014;99(6):1331-50.  
18  
19  
20 11 56. Weliwita A, Nyange D, Tsujii H. Food demand patterns in Tanzania: A censored  
21 12 regression analysis of microdata. *Sri Lankan J Agric Econ*. 2011;5.  
22  
23  
24 13 57. Basu S, Babiarz KS, Ebrahim S et al. Palm oil taxes and cardiovascular disease  
25 14 mortality in India: economic-epidemiologic model. *BMJ* 2013;347:f6048.  
26  
27 15 58. Wodon QT, Tsimpo C, Backiny-Yetna P et al. Potential impact of higher food prices  
28 16 on poverty: summary estimates for a dozen west and central African countries  
29 17 [Internet]. Washington, DC: World Bank; 2008 [cited 2016 March 18]. 33p. World  
30 18 Bank Policy Research Working Paper No. 4745. Available from:  
31 19 <http://documents.worldbank.org/>  
32  
33  
34 20 59. Wodon QT, Zaman H. Rising food prices in Sub-Saharan Africa: Poverty impact and  
35 21 policy responses [Internet]. Washington, DC: World Bank; 2008 [cited 2016 March  
36 22 18]. 28p. World Bank Policy Research Working Paper No. 4738. Available from:  
37 23 <http://documents.worldbank.org/>  
38  
39  
40  
41 24 60. Downs SM, Thow A-M, Ghosh-Jerath S et al. The feasibility of multisectoral policy  
42 25 options aimed at reducing trans fats and encouraging its replacement with healthier  
43 26 oils in India. *Health Policy Plan*. 2014:czu031.  
44  
45  
46  
47  
48  
49  
50  
51  
52  
53  
54  
55  
56  
57  
58  
59  
60

1  
2  
3 **Figure legends**  
4

5  
6 **Figure 1.** Selection of study participants, DUCS-HTN biomarker sub-study, 2014  
7

8 **Figure 2.** Association between diet and serum total cholesterol. Values were adjusted for  
9 age, sex, socioeconomic status, food consumption frequency, total energy intake, major  
10 cooking oil used, physical activity and alcohol consumption.  
11

12  
13 **Figure 3.** Diagnosis, awareness and treatment of hypercholesterolaemia in men (Part A;  
14 n=54 for all percentages) and women (Part B; n=110 for all percentages) in the DUCS-  
15 HTN biomarker sub-study, 2014.  
16  
17  
18  
19  
20  
21  
22  
23  
24  
25  
26  
27  
28  
29  
30  
31  
32  
33  
34  
35  
36  
37  
38  
39  
40  
41  
42  
43  
44  
45  
46  
47  
48  
49  
50  
51  
52  
53  
54  
55  
56  
57  
58  
59  
60



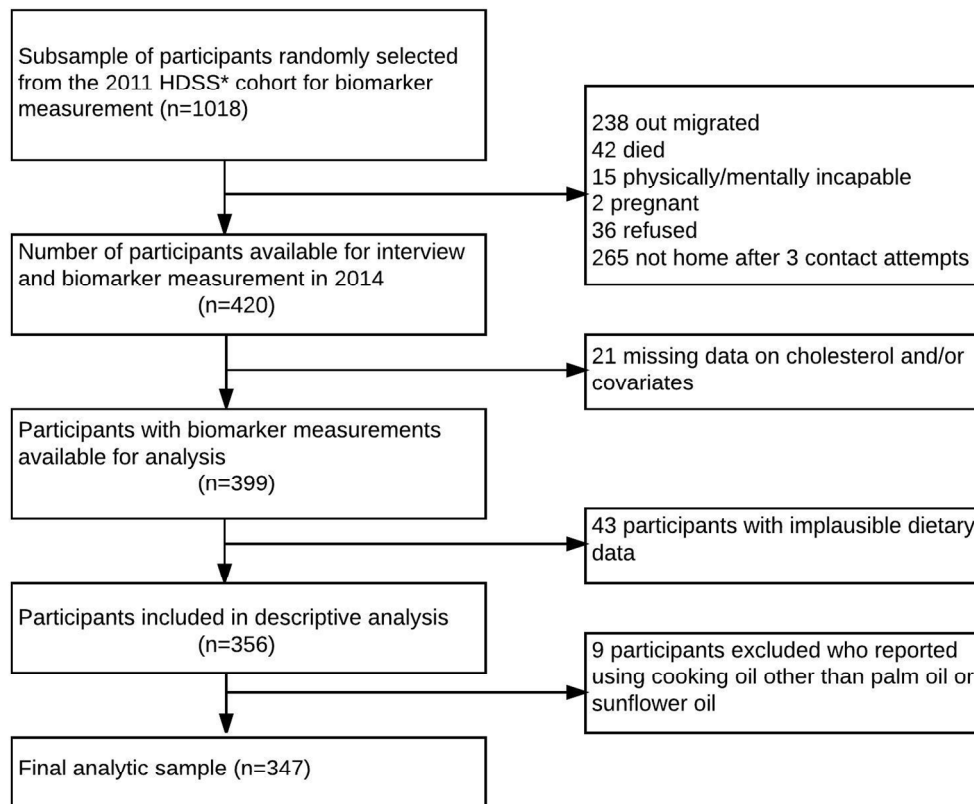

34 \*Dar Es Salaam Health and Demographic Surveillance System

36 Figure 1. Selection of study participants, DUCS-HTN biomarker sub-study, 2014

38 127x111mm (300 x 300 DPI)

40  
41  
42  
43  
44  
45  
46  
47  
48  
49  
50  
51  
52  
53  
54  
55  
56  
57  
58  
59  
60

only





Figure 2. Association between diet and serum total cholesterol. Values were adjusted for age, sex, socioeconomic status, food consumption frequency, total energy intake, cooking oil, physical activity and alcohol consumption.

155x113mm (300 x 300 DPI)

ew only

1  
2  
3  
4  
5  
6  
7  
8  
9  
10  
11  
12  
13  
14  
15  
16  
17  
18  
19  
20  
21  
22  
23  
24  
25  
26  
27  
28  
29  
30  
31  
32  
33  
34  
35  
36  
37  
38  
39  
40  
41  
42  
43  
44  
45  
46  
47  
48  
49  
50  
51  
52  
53  
54  
55  
56  
57  
58  
59  
60



Figure 3. Diagnosis, awareness and treatment of hypercholesterolaemia in men (Part A; n=54 for all percentages) and women (Part B; n=110 for all percentages) in the DUCS-HTN biomarker sub-study, 2014.

114x60mm (300 x 300 DPI)

review only

STROBE Statement—Checklist of items that should be included in reports of *cross-sectional studies*

|                              | Item No | Recommendation                                                                                                                                                                                                                                                                                                                                                                                                                                                       |
|------------------------------|---------|----------------------------------------------------------------------------------------------------------------------------------------------------------------------------------------------------------------------------------------------------------------------------------------------------------------------------------------------------------------------------------------------------------------------------------------------------------------------|
| <b>Title and abstract</b>    | 1       | (a) Indicate the study's design with a commonly used term in the title or the abstract <a href="#">[Within the title page 1 and method section of the abstract page 2]</a><br>(b) Provide in the abstract an informative and balanced summary of what was done and what was found <a href="#">[See results section of the abstract page 2]</a>                                                                                                                       |
| <b>Introduction</b>          |         |                                                                                                                                                                                                                                                                                                                                                                                                                                                                      |
| Background/rationale         | 2       | Explain the scientific background and rationale for the investigation being reported <a href="#">[pages 4,5]</a>                                                                                                                                                                                                                                                                                                                                                     |
| Objectives                   | 3       | State specific objectives, including any prespecified hypotheses <a href="#">[page 5]</a>                                                                                                                                                                                                                                                                                                                                                                            |
| <b>Methods</b>               |         |                                                                                                                                                                                                                                                                                                                                                                                                                                                                      |
| Study design                 | 4       | Present key elements of study design early in the paper <a href="#">[page 6]</a>                                                                                                                                                                                                                                                                                                                                                                                     |
| Setting                      | 5       | Describe the setting, locations, and relevant dates, including periods of recruitment, exposure, follow-up, and data collection <a href="#">[page 6]</a>                                                                                                                                                                                                                                                                                                             |
| Participants                 | 6       | (a) Give the eligibility criteria, and the sources and methods of selection of participants <a href="#">[page 6]</a>                                                                                                                                                                                                                                                                                                                                                 |
| Variables                    | 7       | Clearly define all outcomes, exposures, predictors, potential confounders, and effect modifiers. Give diagnostic criteria, if applicable <a href="#">[page 6-8]</a>                                                                                                                                                                                                                                                                                                  |
| Data sources/<br>measurement | 8*      | For each variable of interest, give sources of data and details of methods of assessment (measurement). Describe comparability of assessment methods if there is more than one group <a href="#">[page 6-8]</a>                                                                                                                                                                                                                                                      |
| Bias                         | 9       | Describe any efforts to address potential sources of bias <a href="#">[page 8]</a>                                                                                                                                                                                                                                                                                                                                                                                   |
| Study size                   | 10      | Explain how the study size was arrived at <a href="#">[page 6]</a>                                                                                                                                                                                                                                                                                                                                                                                                   |
| Quantitative variables       | 11      | Explain how quantitative variables were handled in the analyses. If applicable, describe which groupings were chosen and why <a href="#">[pages 7, 8]</a>                                                                                                                                                                                                                                                                                                            |
| Statistical methods          | 12      | (a) Describe all statistical methods, including those used to control for confounding <a href="#">[page 8]</a><br>(b) Describe any methods used to examine subgroups and interactions <a href="#">[page 8]</a><br>(c) Explain how missing data were addressed <a href="#">[page 8]</a><br>(d) If applicable, describe analytical methods taking account of sampling strategy <a href="#">[N/A]</a><br>(e) Describe any sensitivity analyses <a href="#">[page 8]</a> |
| <b>Results</b>               |         |                                                                                                                                                                                                                                                                                                                                                                                                                                                                      |
| Participants                 | 13*     | (a) Report numbers of individuals at each stage of study—eg numbers potentially eligible, examined for eligibility, confirmed eligible, included in the study, completing follow-up, and analysed <a href="#">[pages 6, 9 and Figure 1]</a><br>(b) Give reasons for non-participation at each stage <a href="#">[Figure 1]</a><br>(c) Consider use of a flow diagram <a href="#">[Figure 1]</a>                                                                      |
| Descriptive data             | 14*     | (a) Give characteristics of study participants (eg demographic, clinical, social) and information on exposures and potential confounders <a href="#">[page 9 and Table 1]</a><br>(b) Indicate number of participants with missing data for each variable of interest <a href="#">[Figure 1]</a>                                                                                                                                                                      |
| Outcome data                 | 15*     | Report numbers of outcome events or summary measures <a href="#">[pages 9, 18 and Figure 3]</a>                                                                                                                                                                                                                                                                                                                                                                      |
| Main results                 | 16      | (a) Give unadjusted estimates and, if applicable, confounder-adjusted estimates and their precision (eg, 95% confidence interval). Make clear which confounders were                                                                                                                                                                                                                                                                                                 |

|                          |    |                                                                                                                                                                                       |
|--------------------------|----|---------------------------------------------------------------------------------------------------------------------------------------------------------------------------------------|
|                          |    | adjusted for and why they were included [page 14 and Table 2]                                                                                                                         |
|                          |    | (b) Report category boundaries when continuous variables were categorized [table 1]                                                                                                   |
|                          |    | (c) If relevant, consider translating estimates of relative risk into absolute risk for a meaningful time period [N/A]                                                                |
| Other analyses           | 17 | Report other analyses done—eg analyses of subgroups and interactions, and sensitivity analyses [page 14]                                                                              |
| <b>Discussion</b>        |    |                                                                                                                                                                                       |
| Key results              | 18 | Summarise key results with reference to study objectives [pages 18, 19]                                                                                                               |
| Limitations              | 19 | Discuss limitations of the study, taking into account sources of potential bias or imprecision. Discuss both direction and magnitude of any potential bias [page 20]                  |
| Interpretation           | 20 | Give a cautious overall interpretation of results considering objectives, limitations, multiplicity of analyses, results from similar studies, and other relevant evidence [pages 21] |
| Generalisability         | 21 | Discuss the generalisability (external validity) of the study results [pages 21]                                                                                                      |
| <b>Other information</b> |    |                                                                                                                                                                                       |
| Funding                  | 22 | Give the source of funding and the role of the funders for the present study and, if applicable, for the original study on which the present article is based [page 22]               |

\*Give information separately for exposed and unexposed groups.

**Note:** An Explanation and Elaboration article discusses each checklist item and gives methodological background and published examples of transparent reporting. The STROBE checklist is best used in conjunction with this article (freely available on the Web sites of PLoS Medicine at <http://www.plosmedicine.org/>, Annals of Internal Medicine at <http://www.annals.org/>, and Epidemiology at <http://www.epidem.com/>). Information on the STROBE Initiative is available at [www.strobe-statement.org](http://www.strobe-statement.org).
